# Supplementary material for: A “green” variation of the Hirao reaction: the P–C coupling of diethyl phosphite, alkyl phenyl-H-phosphinates and secondary phosphine oxides with bromoarenes using a P-ligand-free Pd(OAc)2catalyst under microwave and solvent-free conditions
Source: Royal Society of Chemistry journal article supplement (doi:10.1039/c4ra03292f), 2014-01-01

## Supplementary Information

**A “green” variation of the Hirao reaction: the P–C coupling of diethyl phosphite, alkyl phenyl-*H*-phosphinates and secondary phosphine oxides with bromoarenes using P-ligand-free Pd(OAc)<sub>2</sub> catalyst under microwave and solvent-free conditions**

**György Keglevich,\* Erzsébet Jablonkai and László B. Balázs**

*Department of Organic Chemistry and Technology, Budapest University of Technology and Economics,  
1521 Budapest, Hungary, E-mail: gkeglevich@mail.bme.hu*

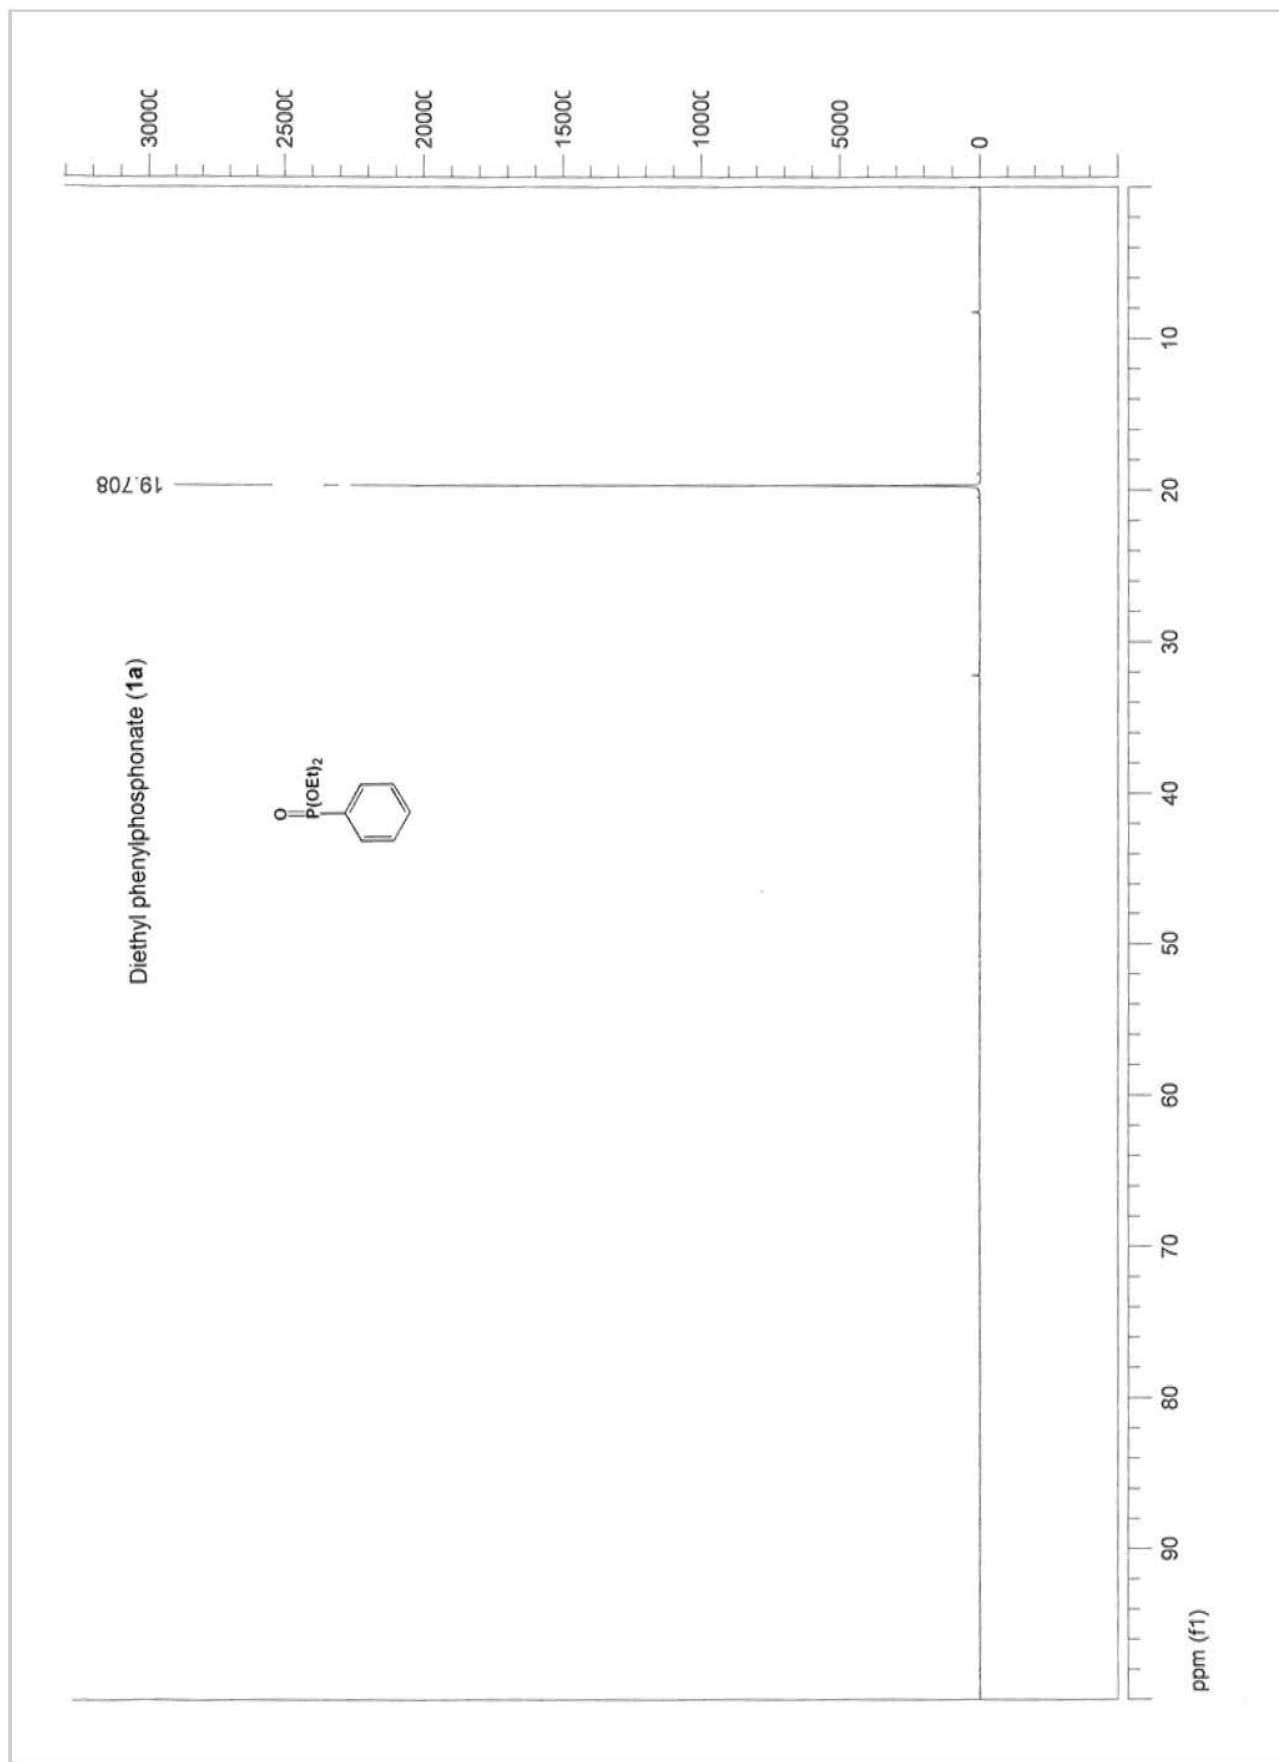

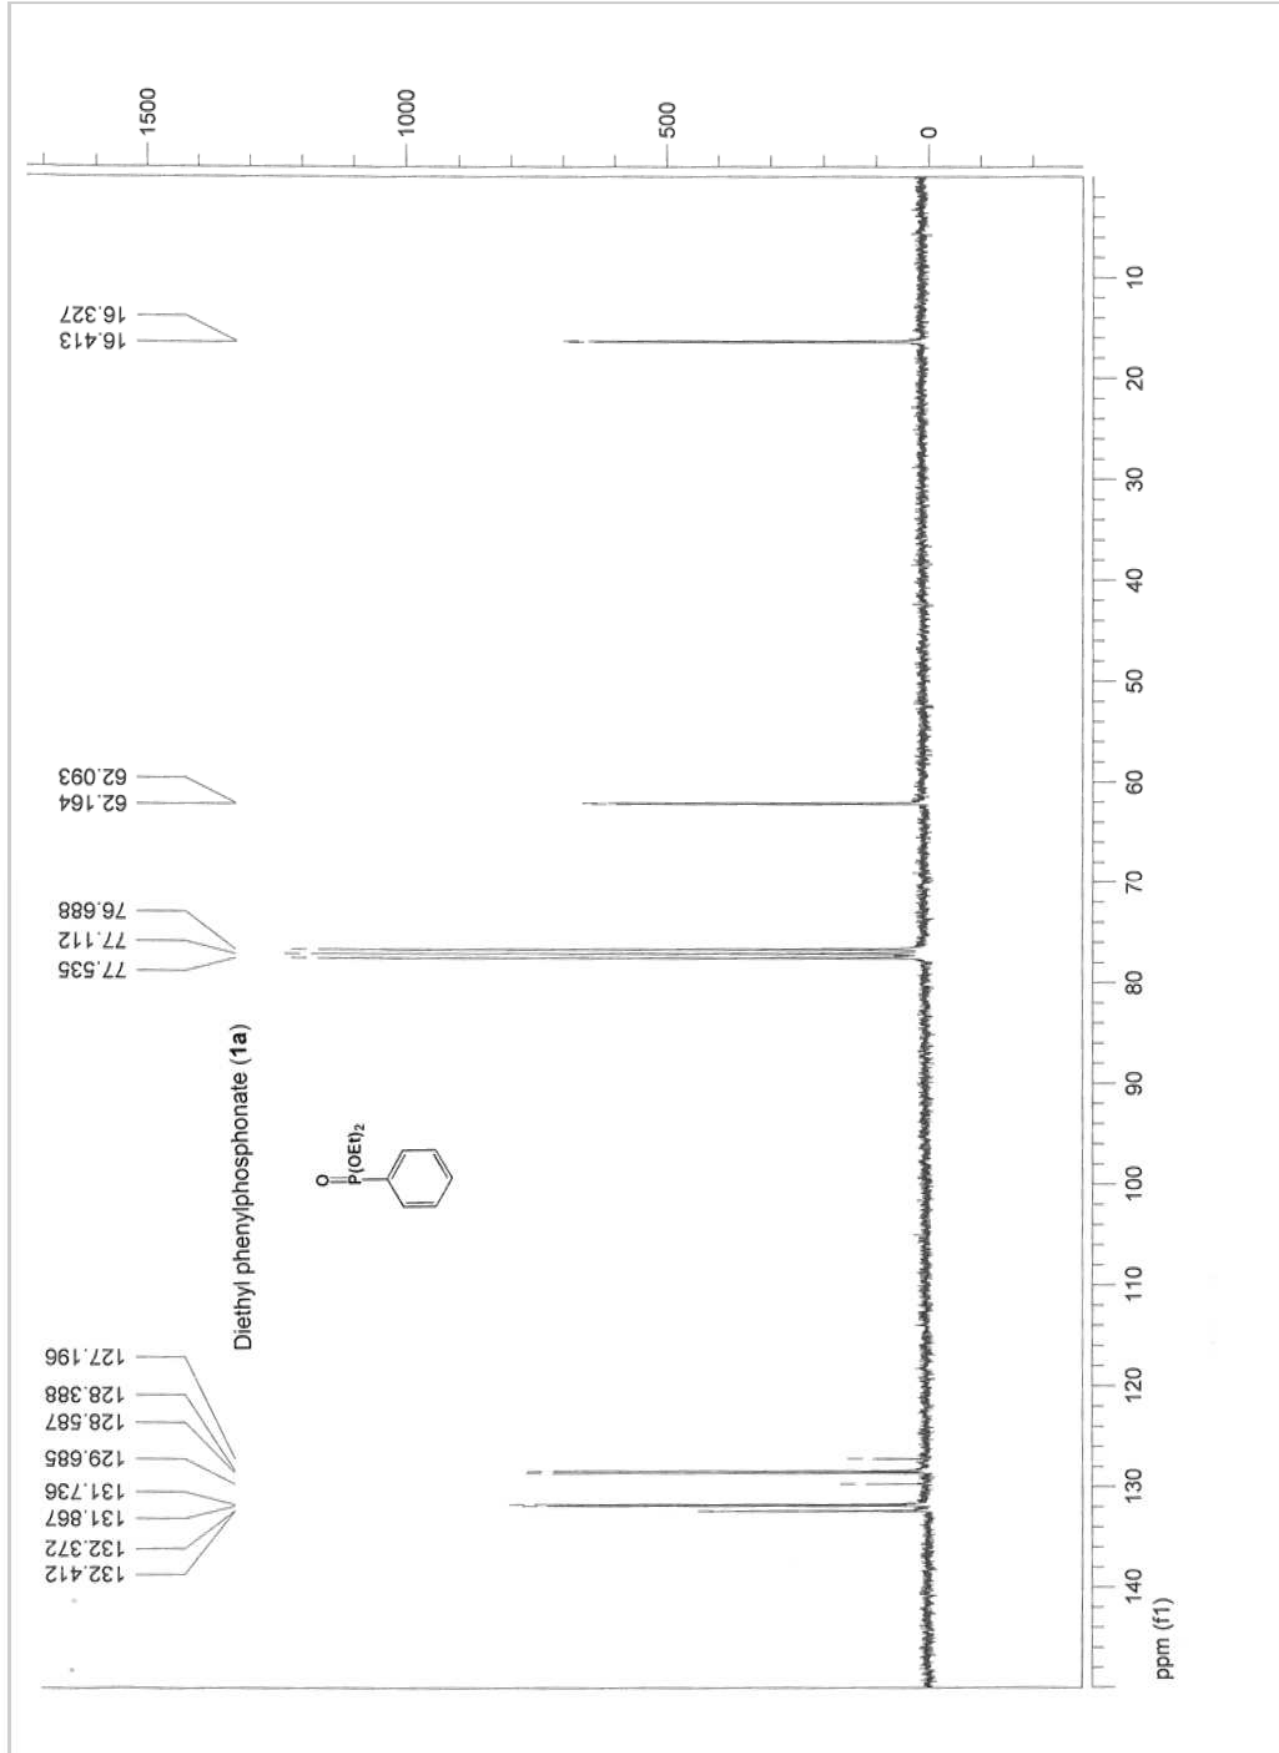

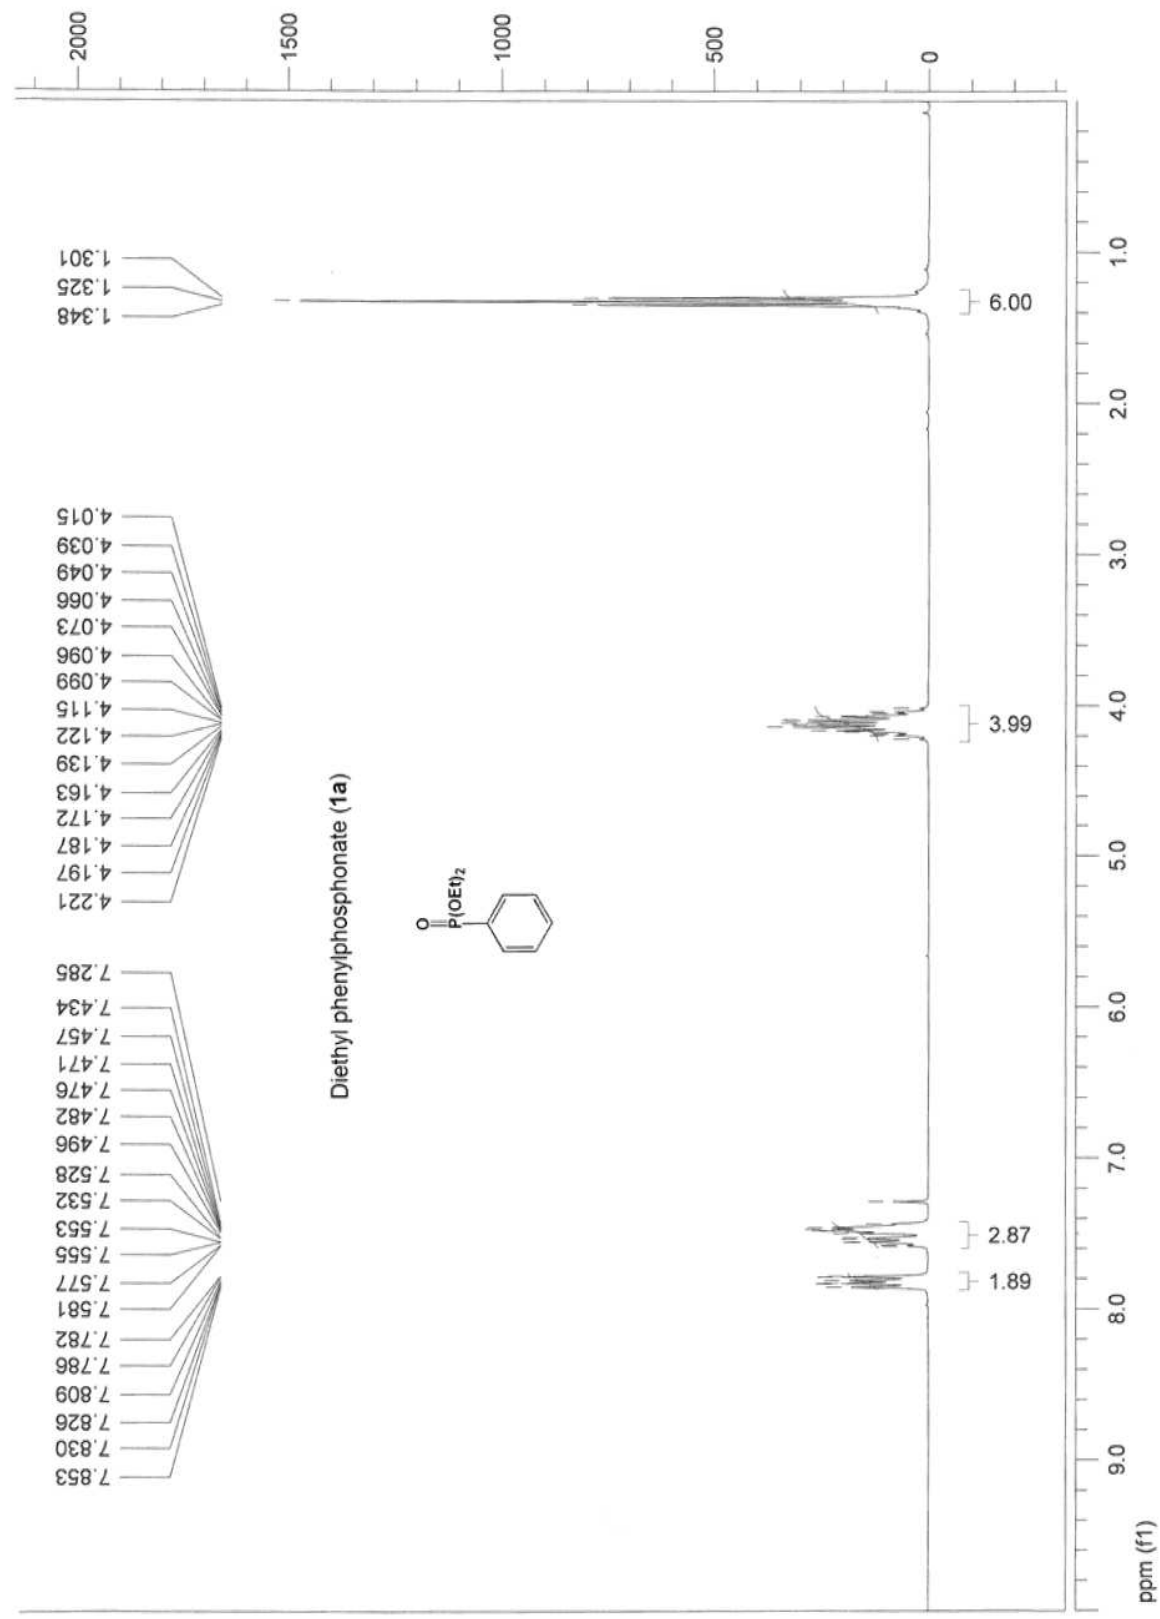

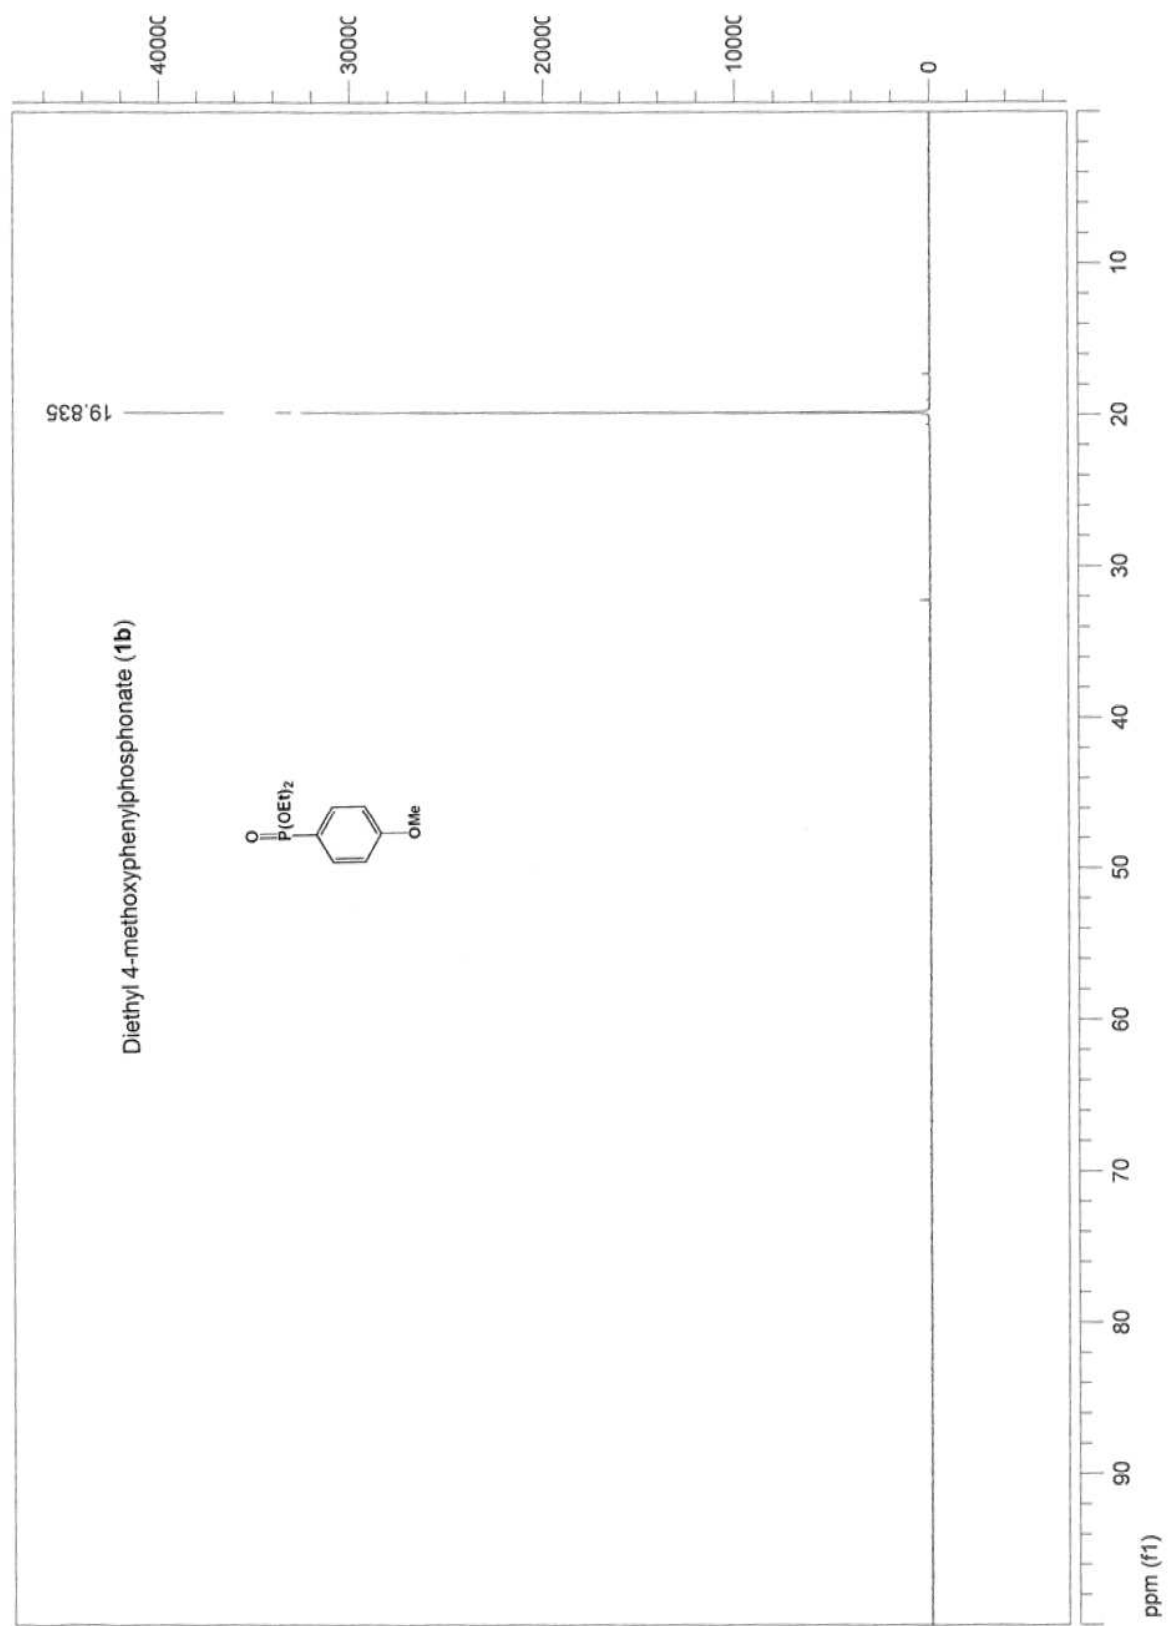

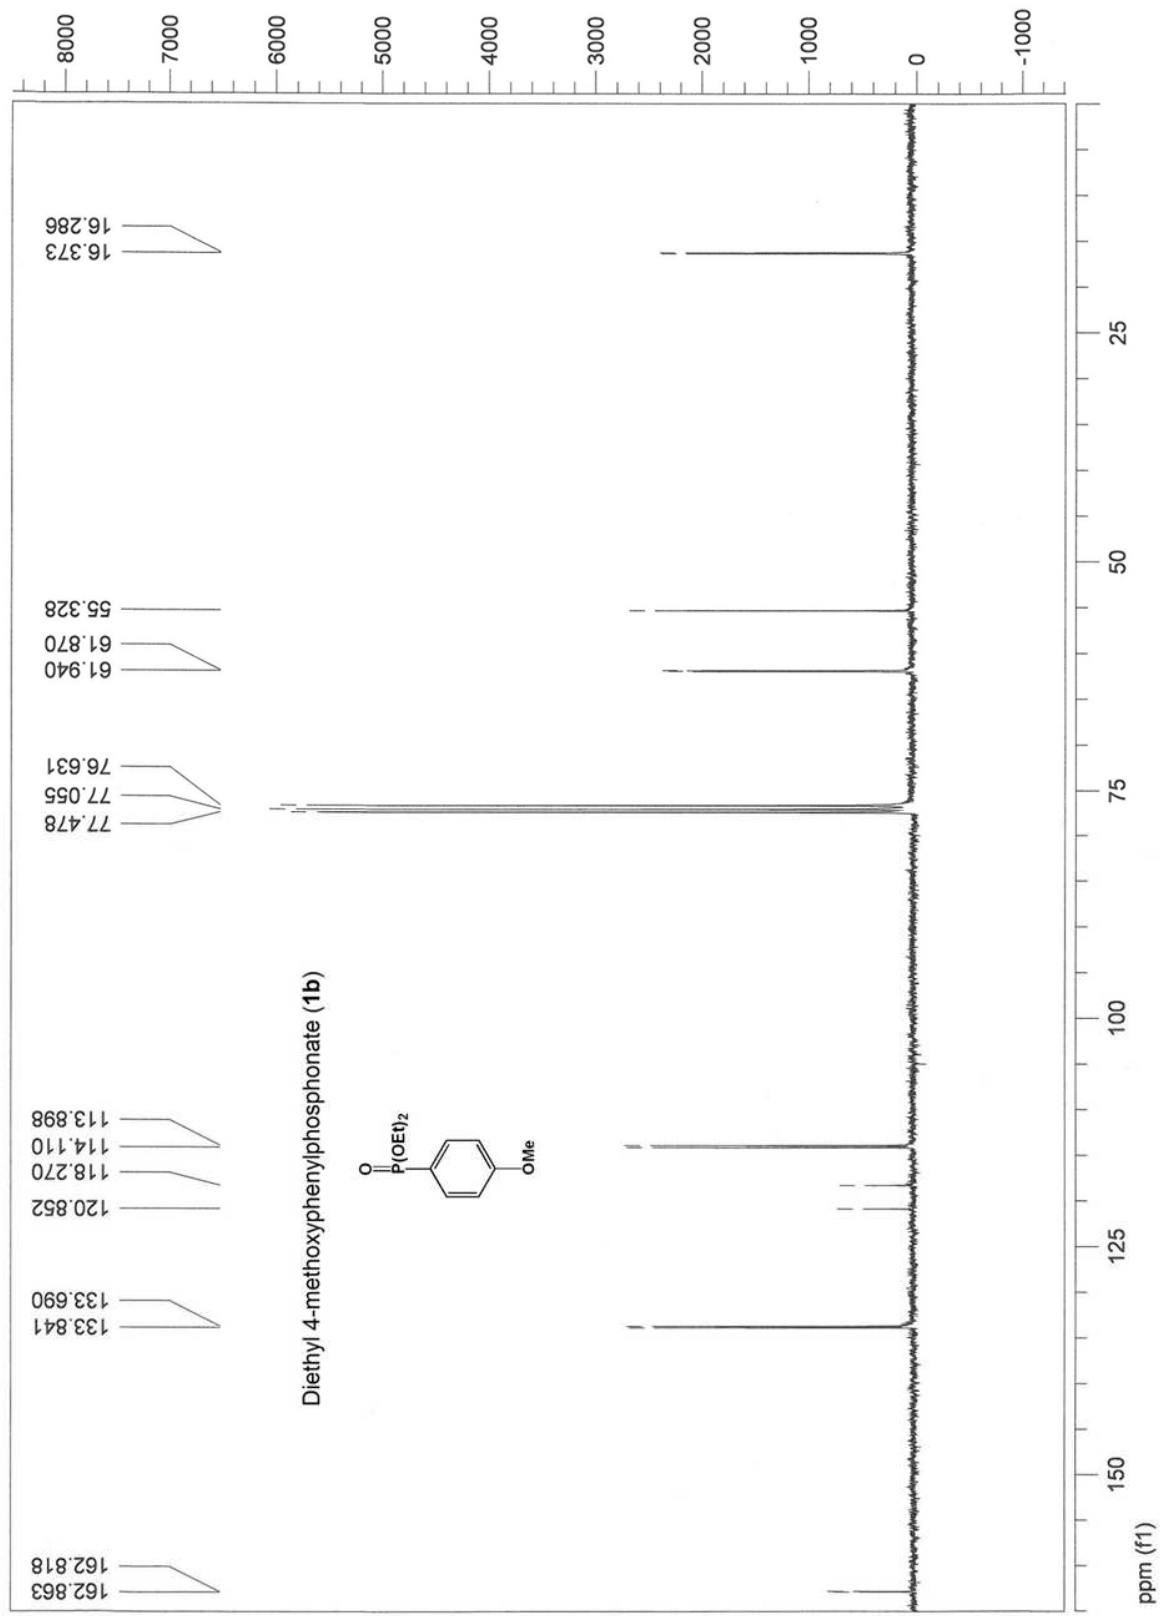

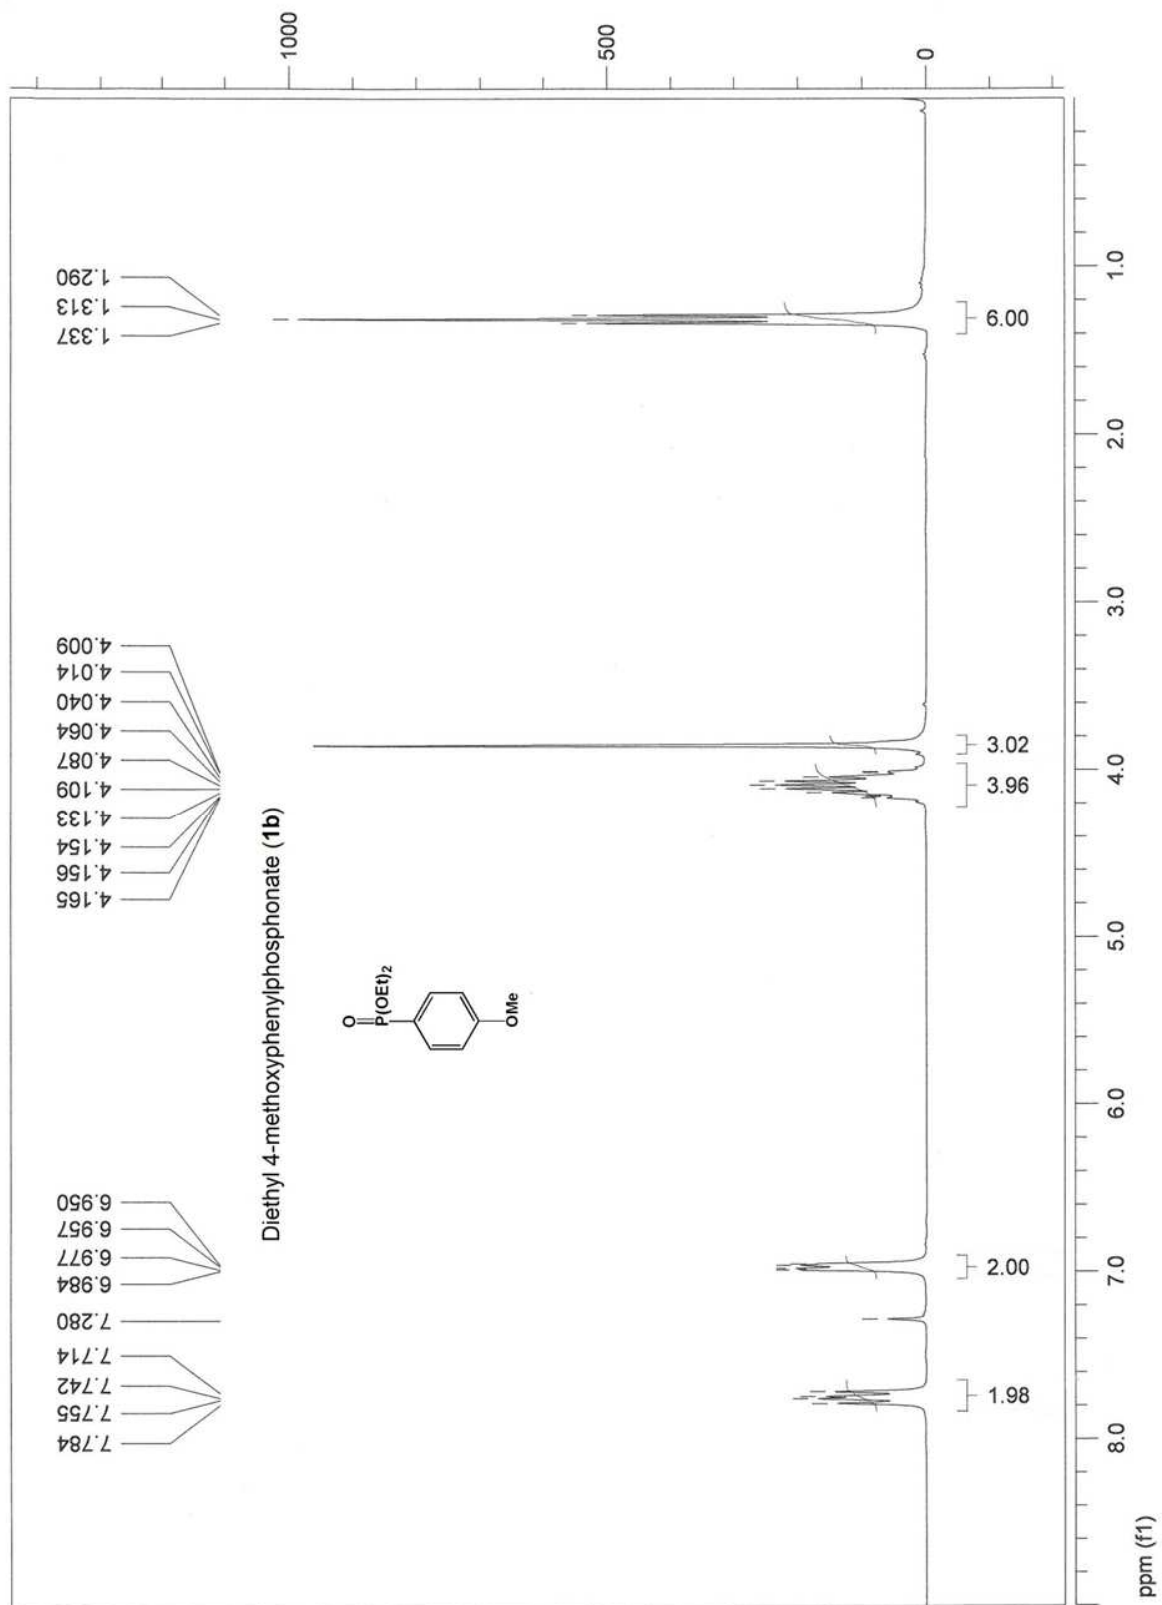

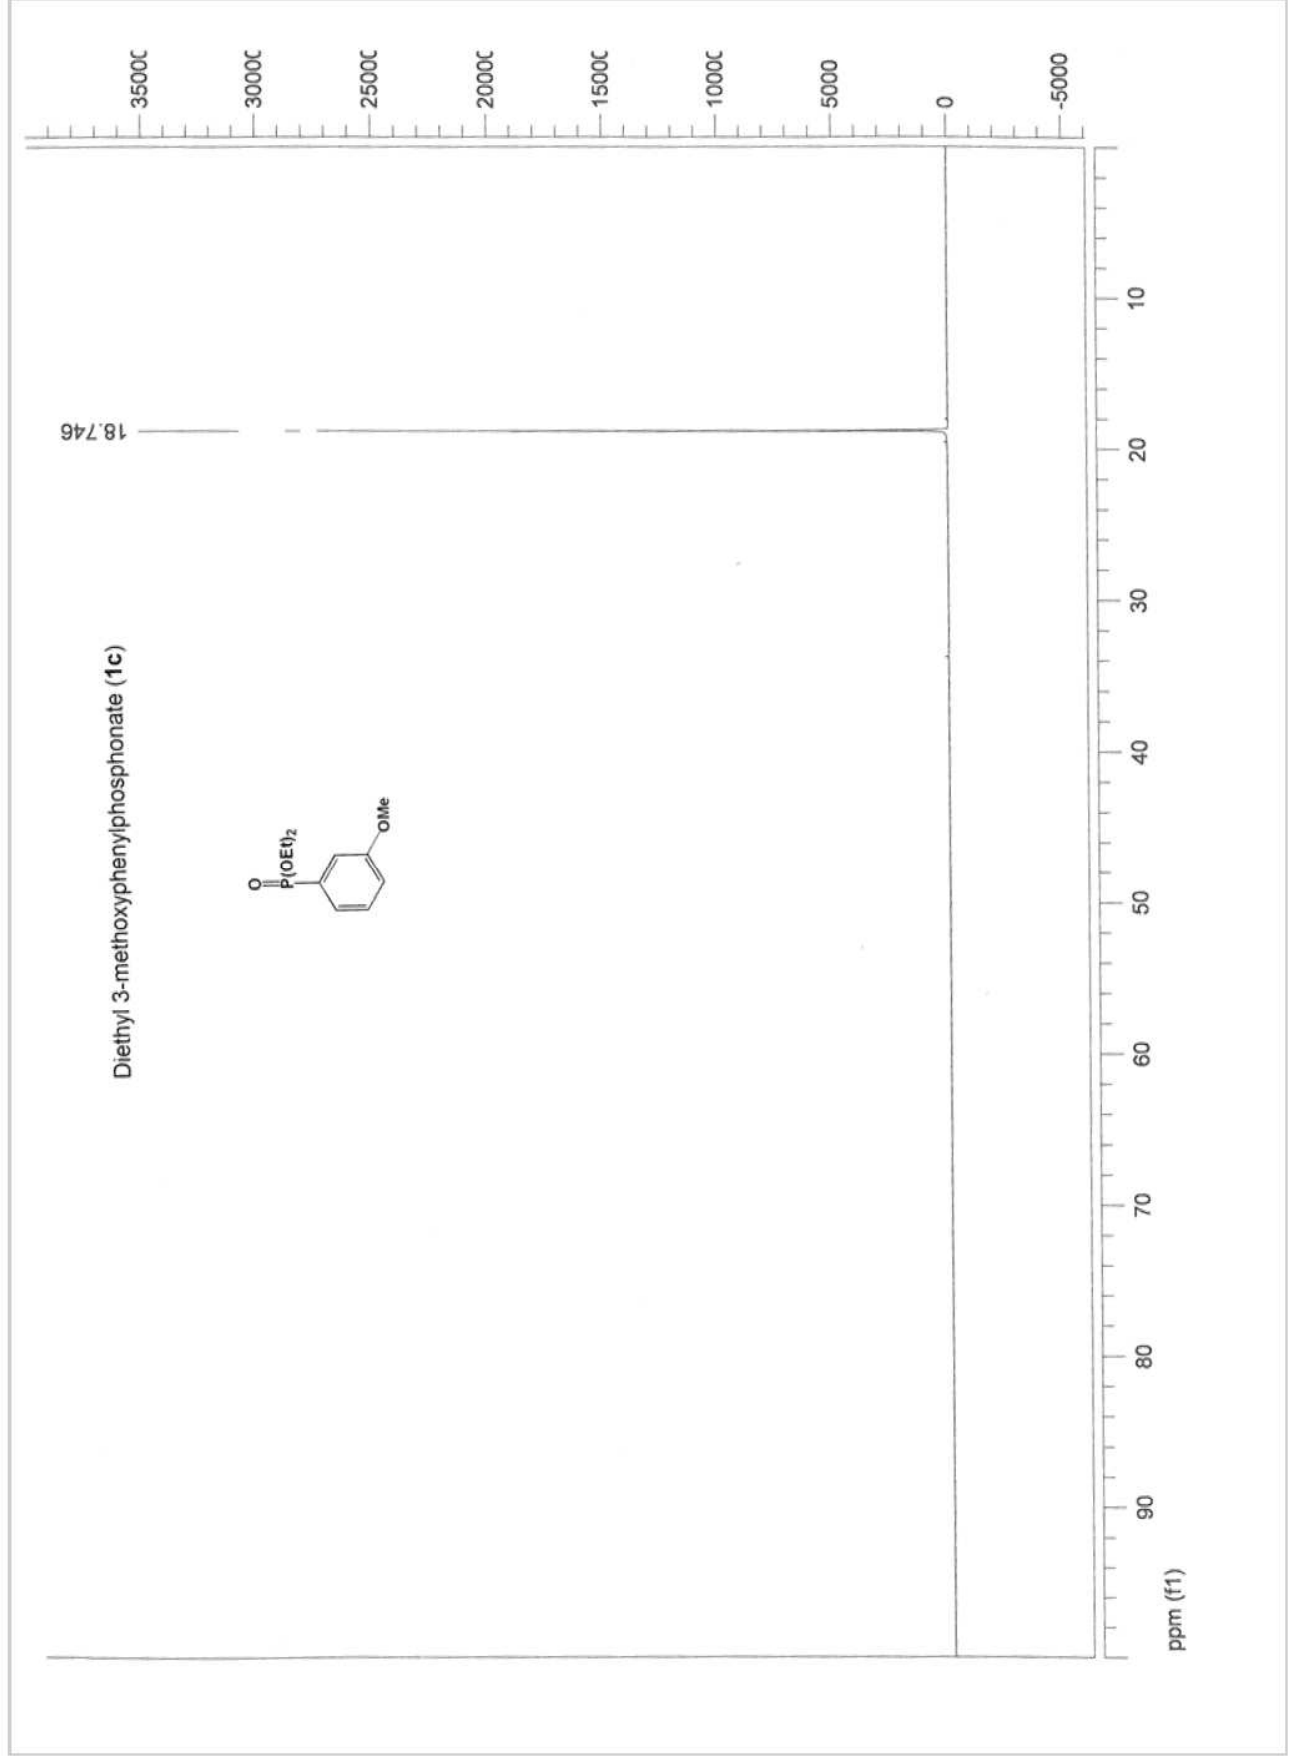



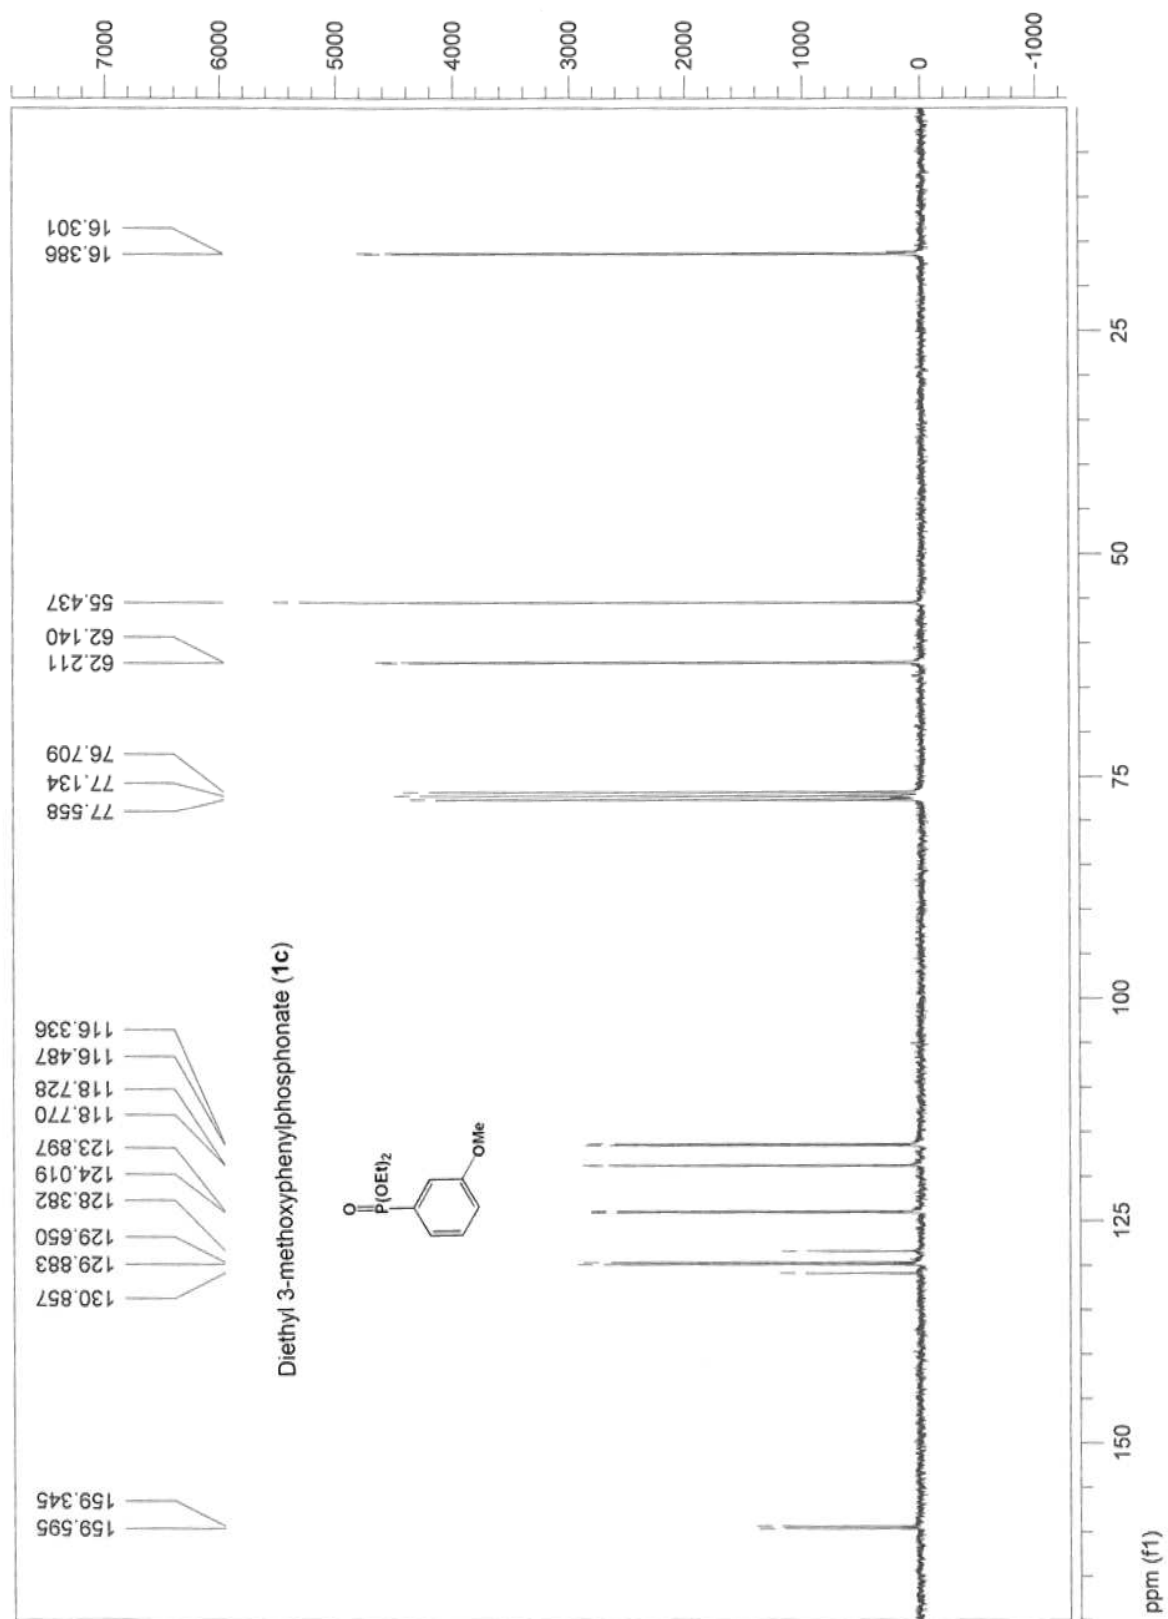

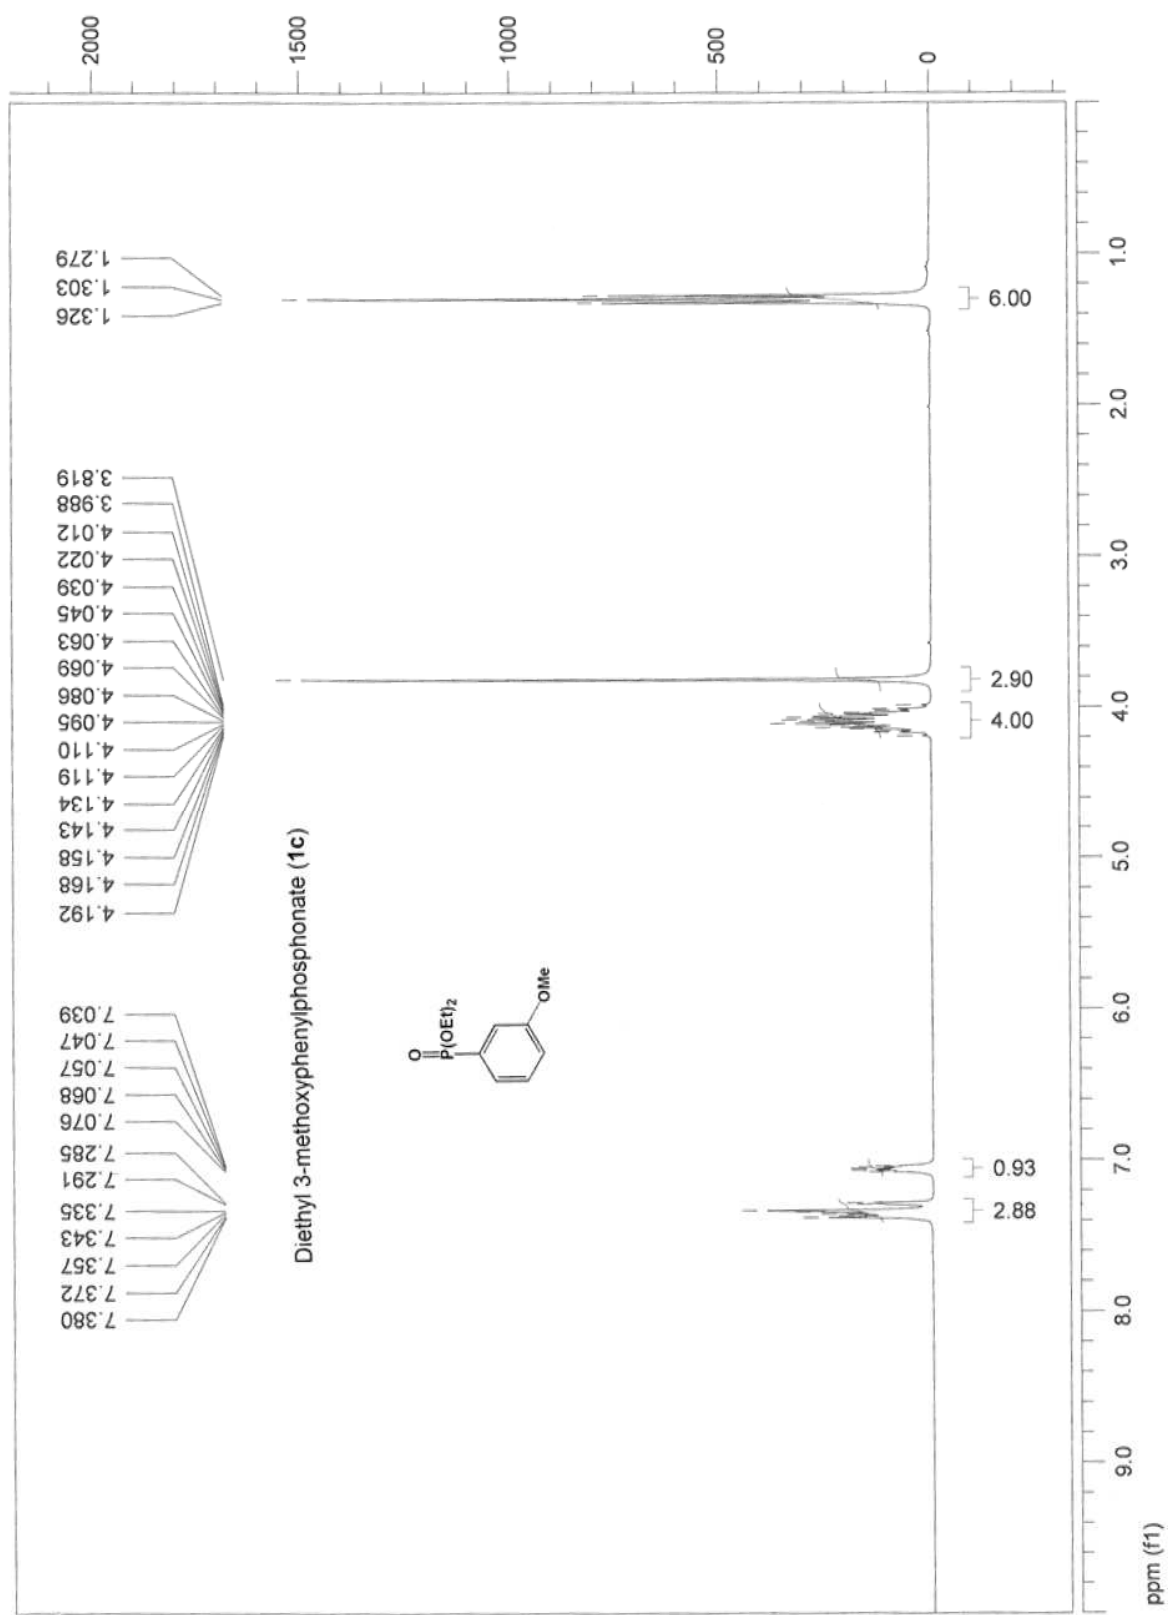

Diethyl 4-propylphenylphosphonate (**1d**)

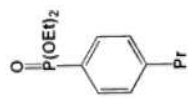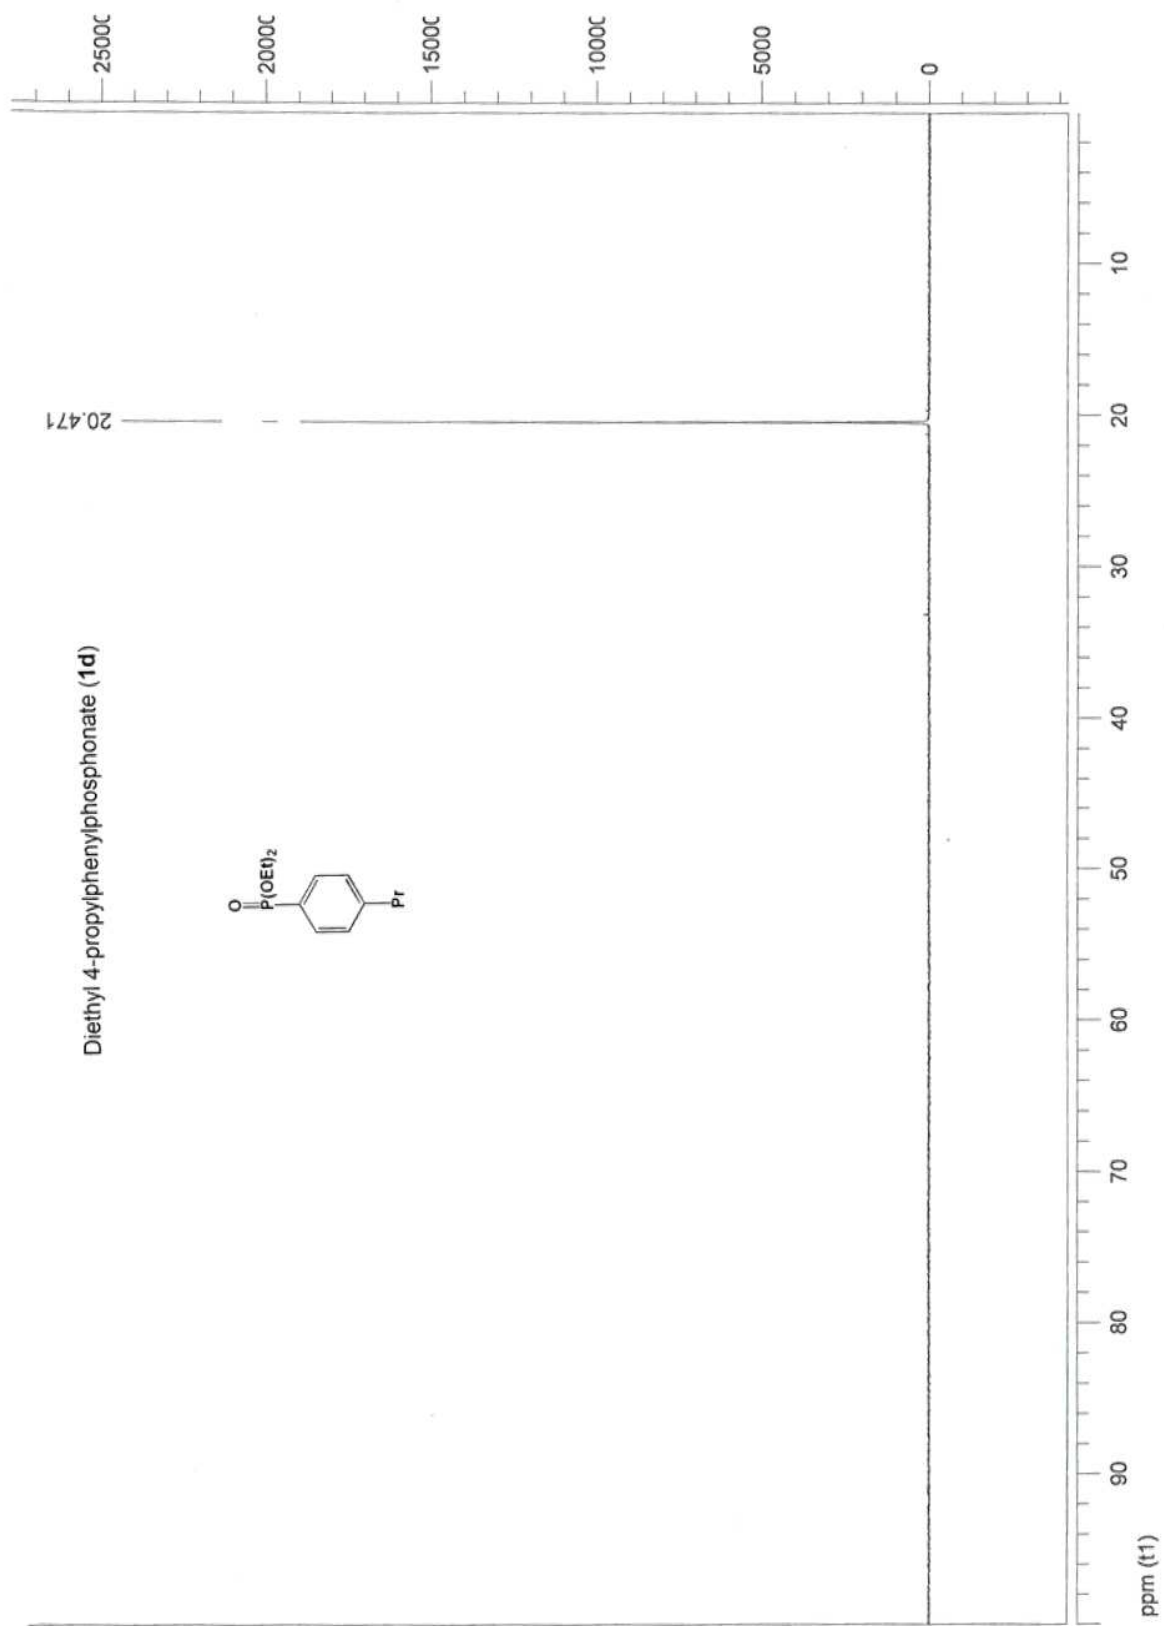

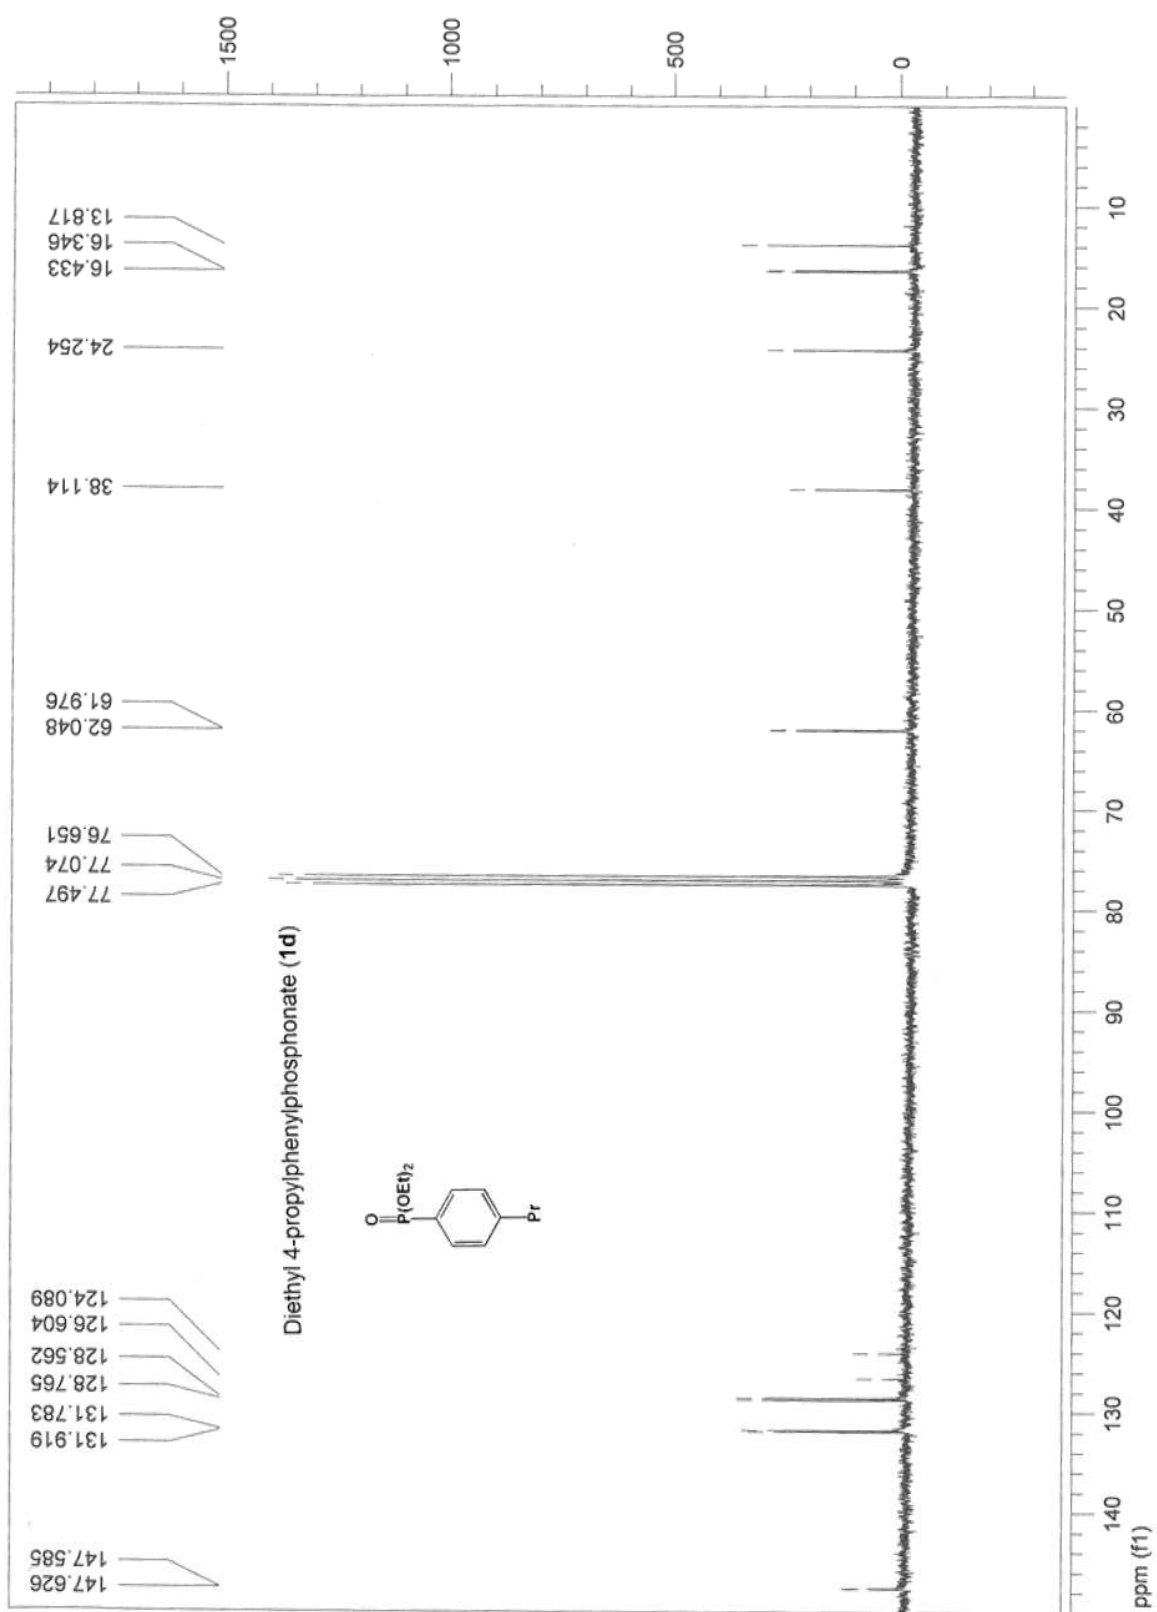

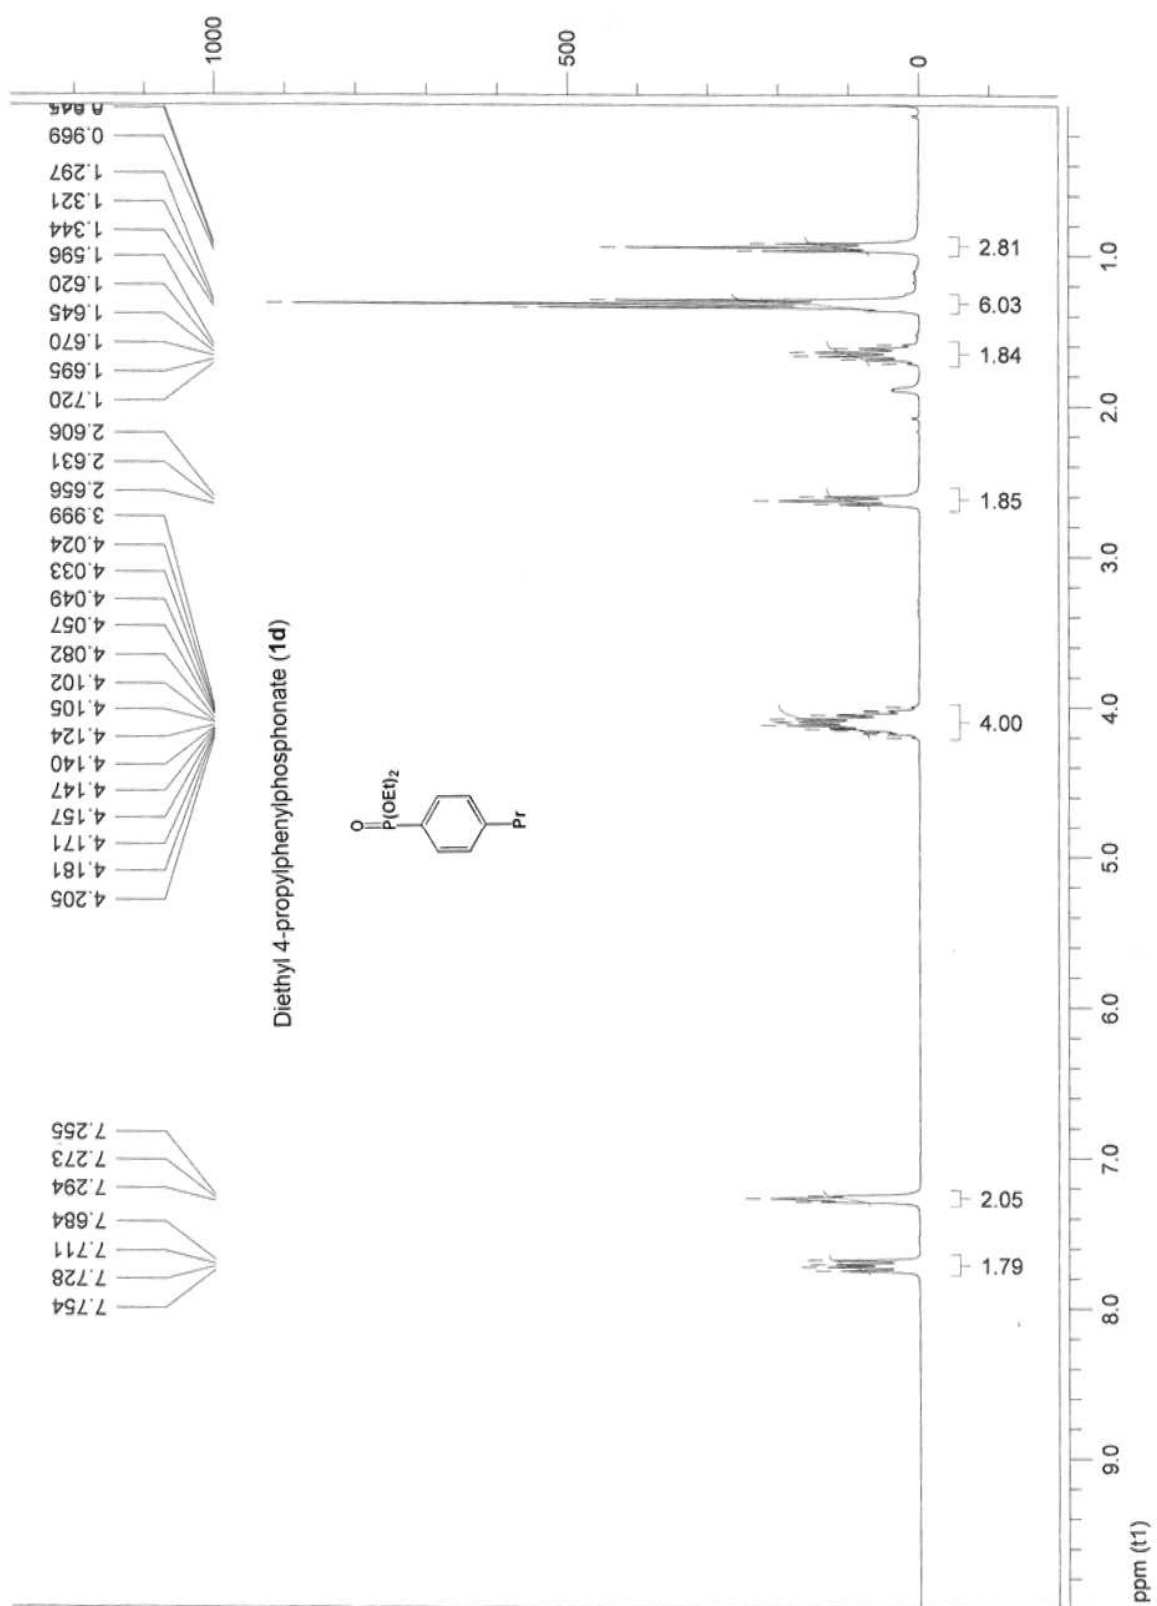

Diethyl 4-ethylphenylphosphonate (**1e**)

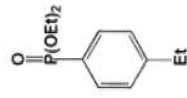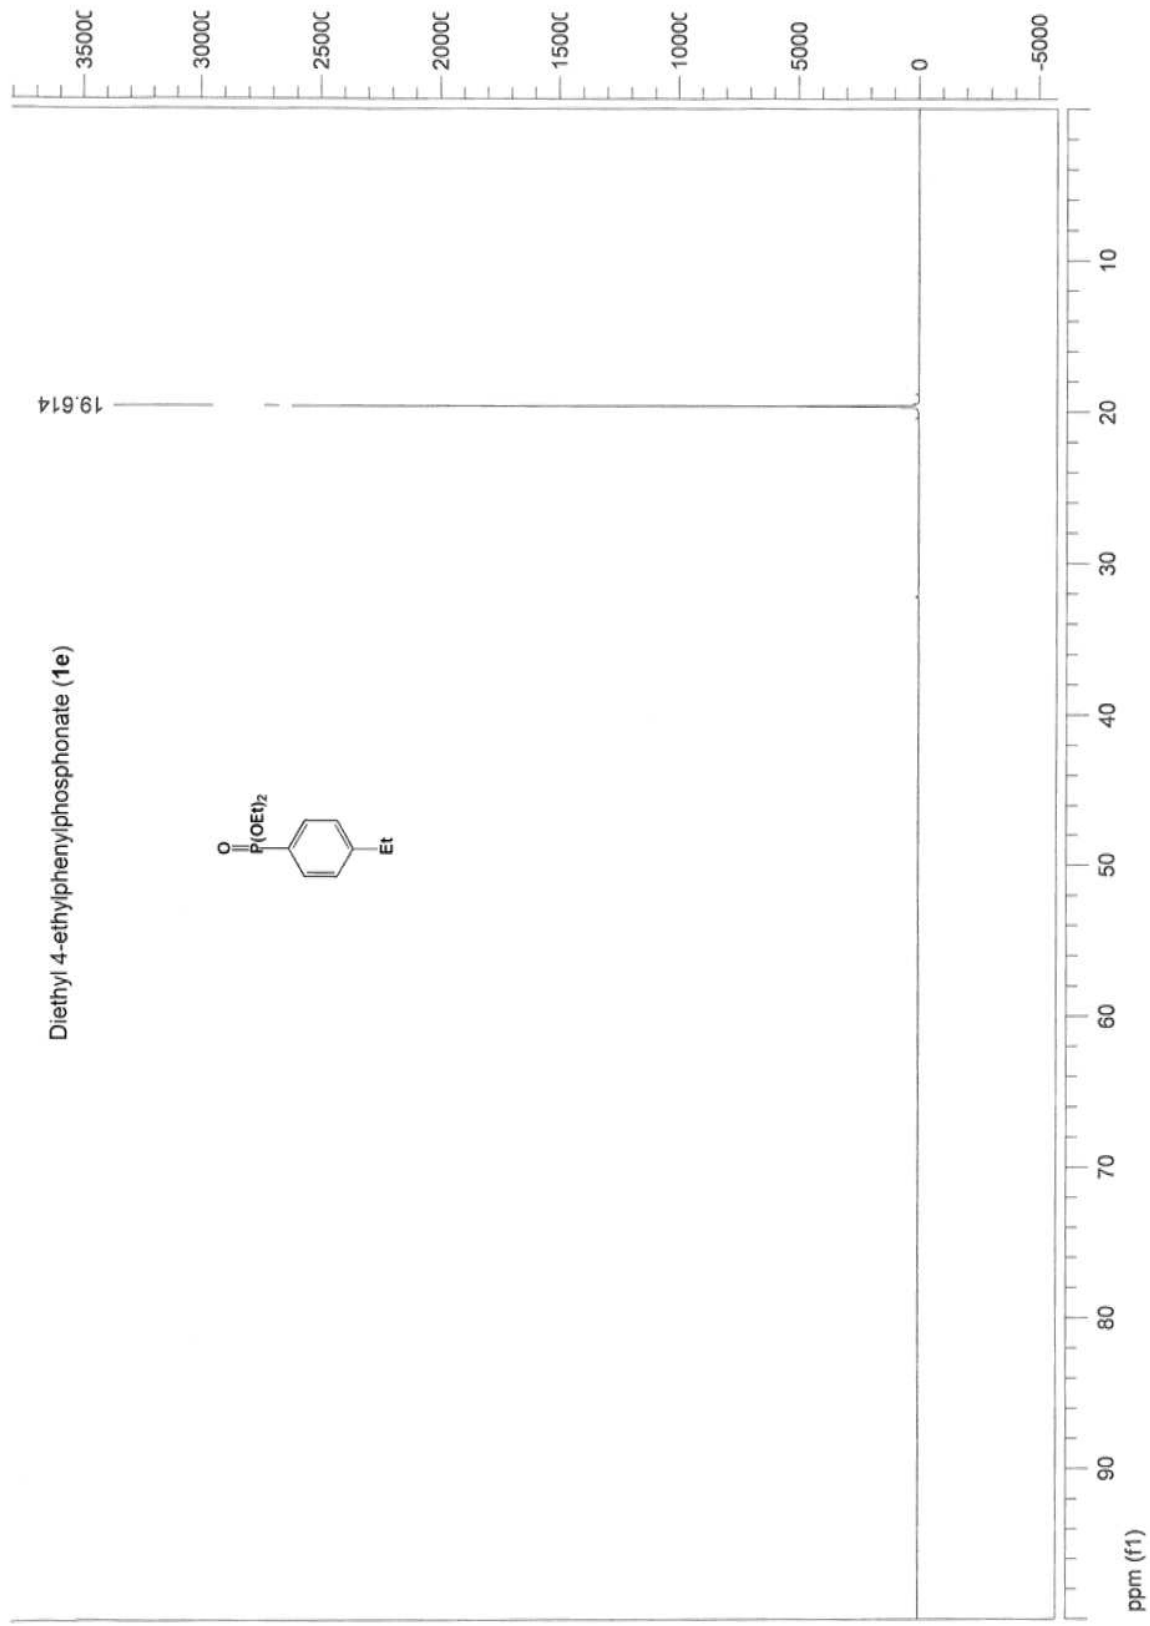

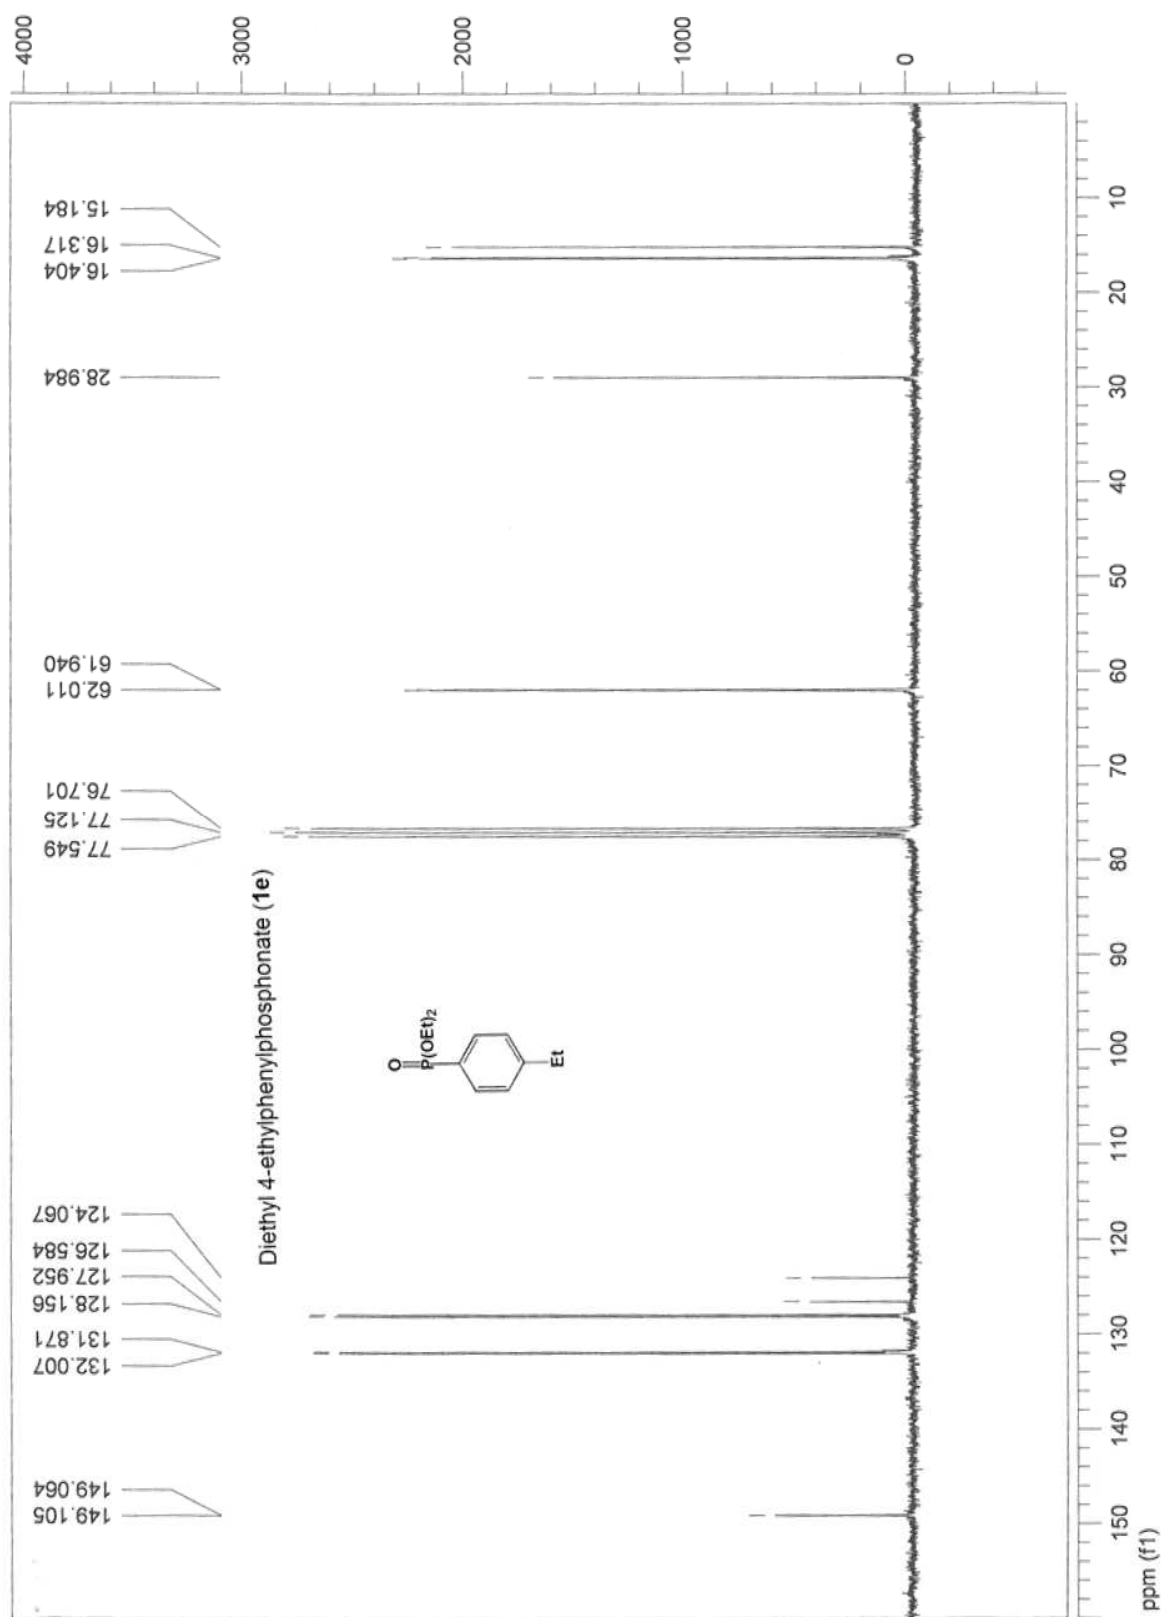

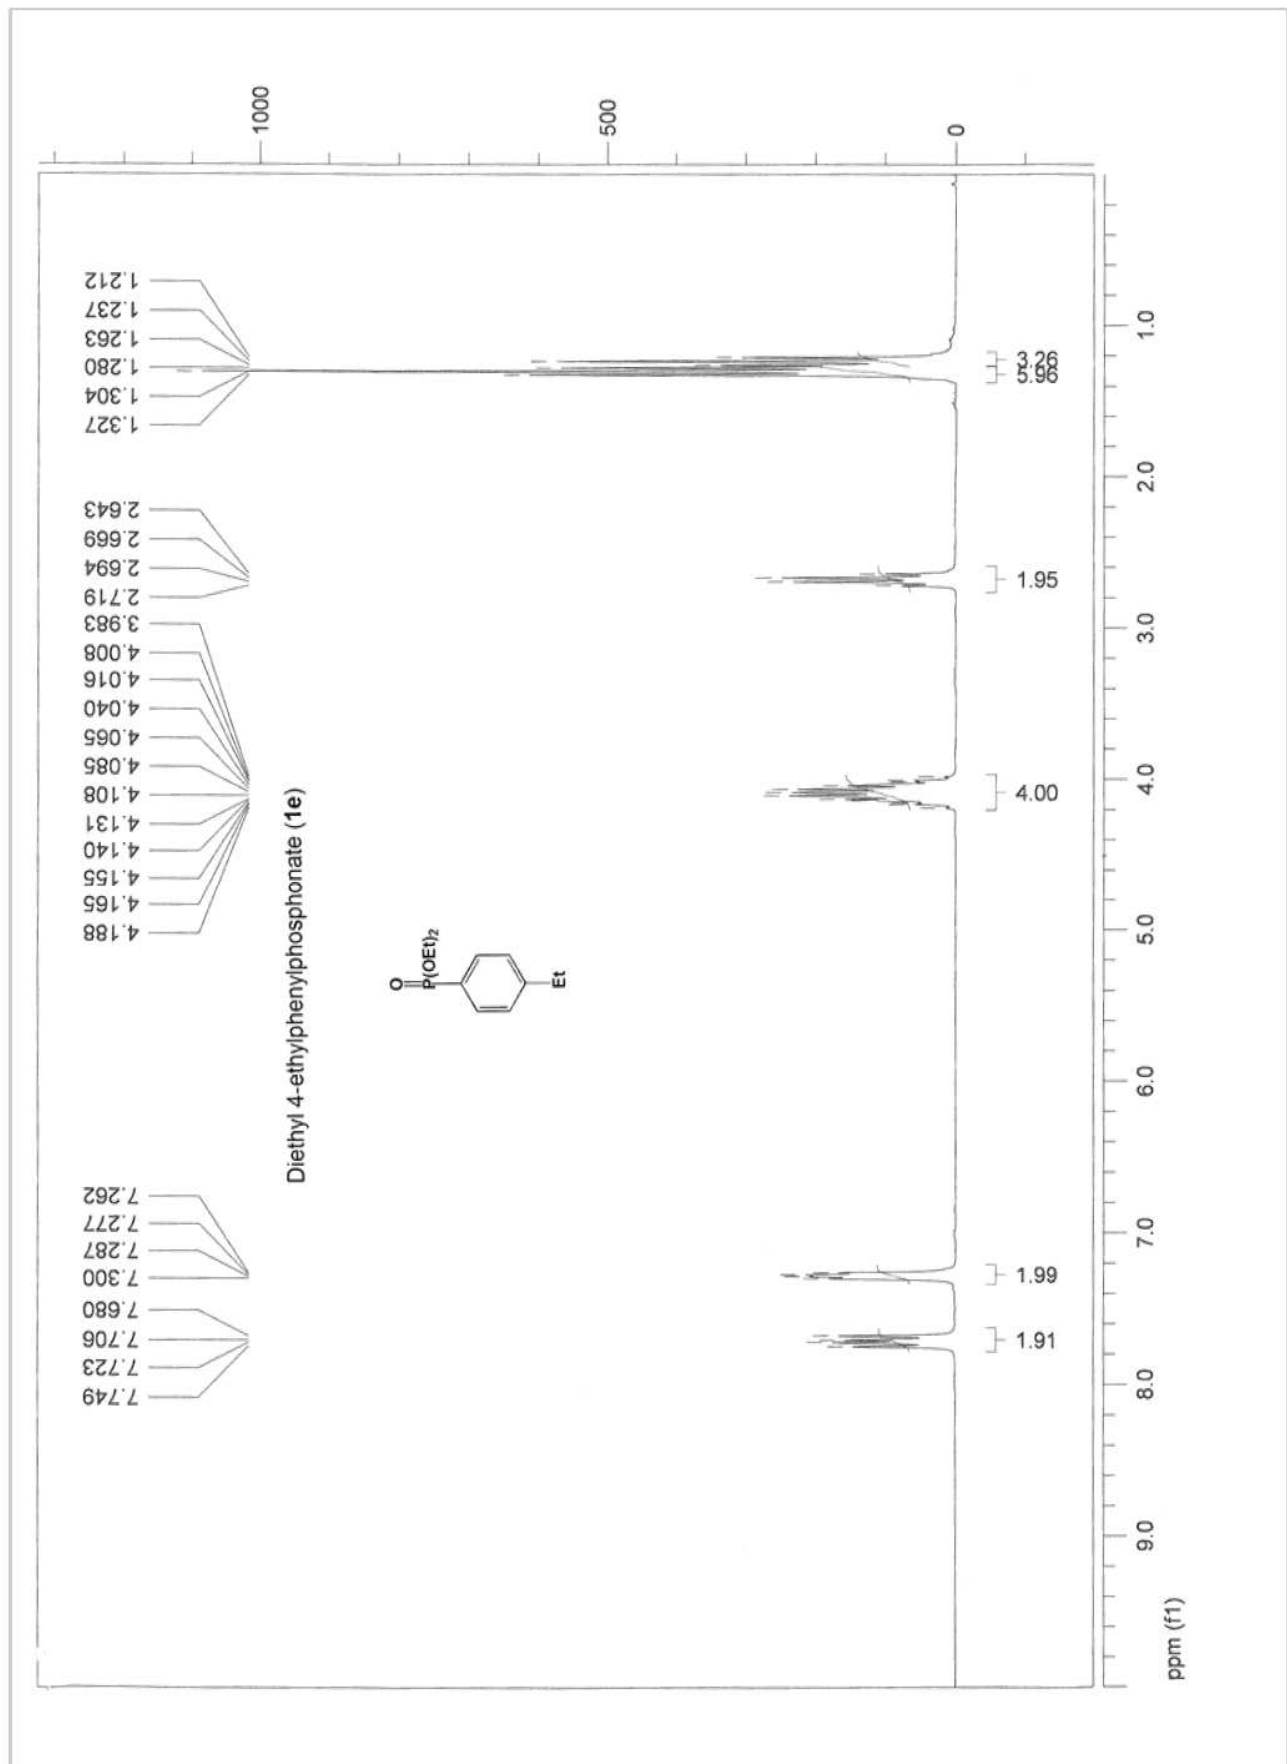



Diethyl 4-methylphenylphosphonate (**1f**)

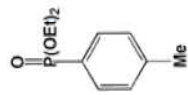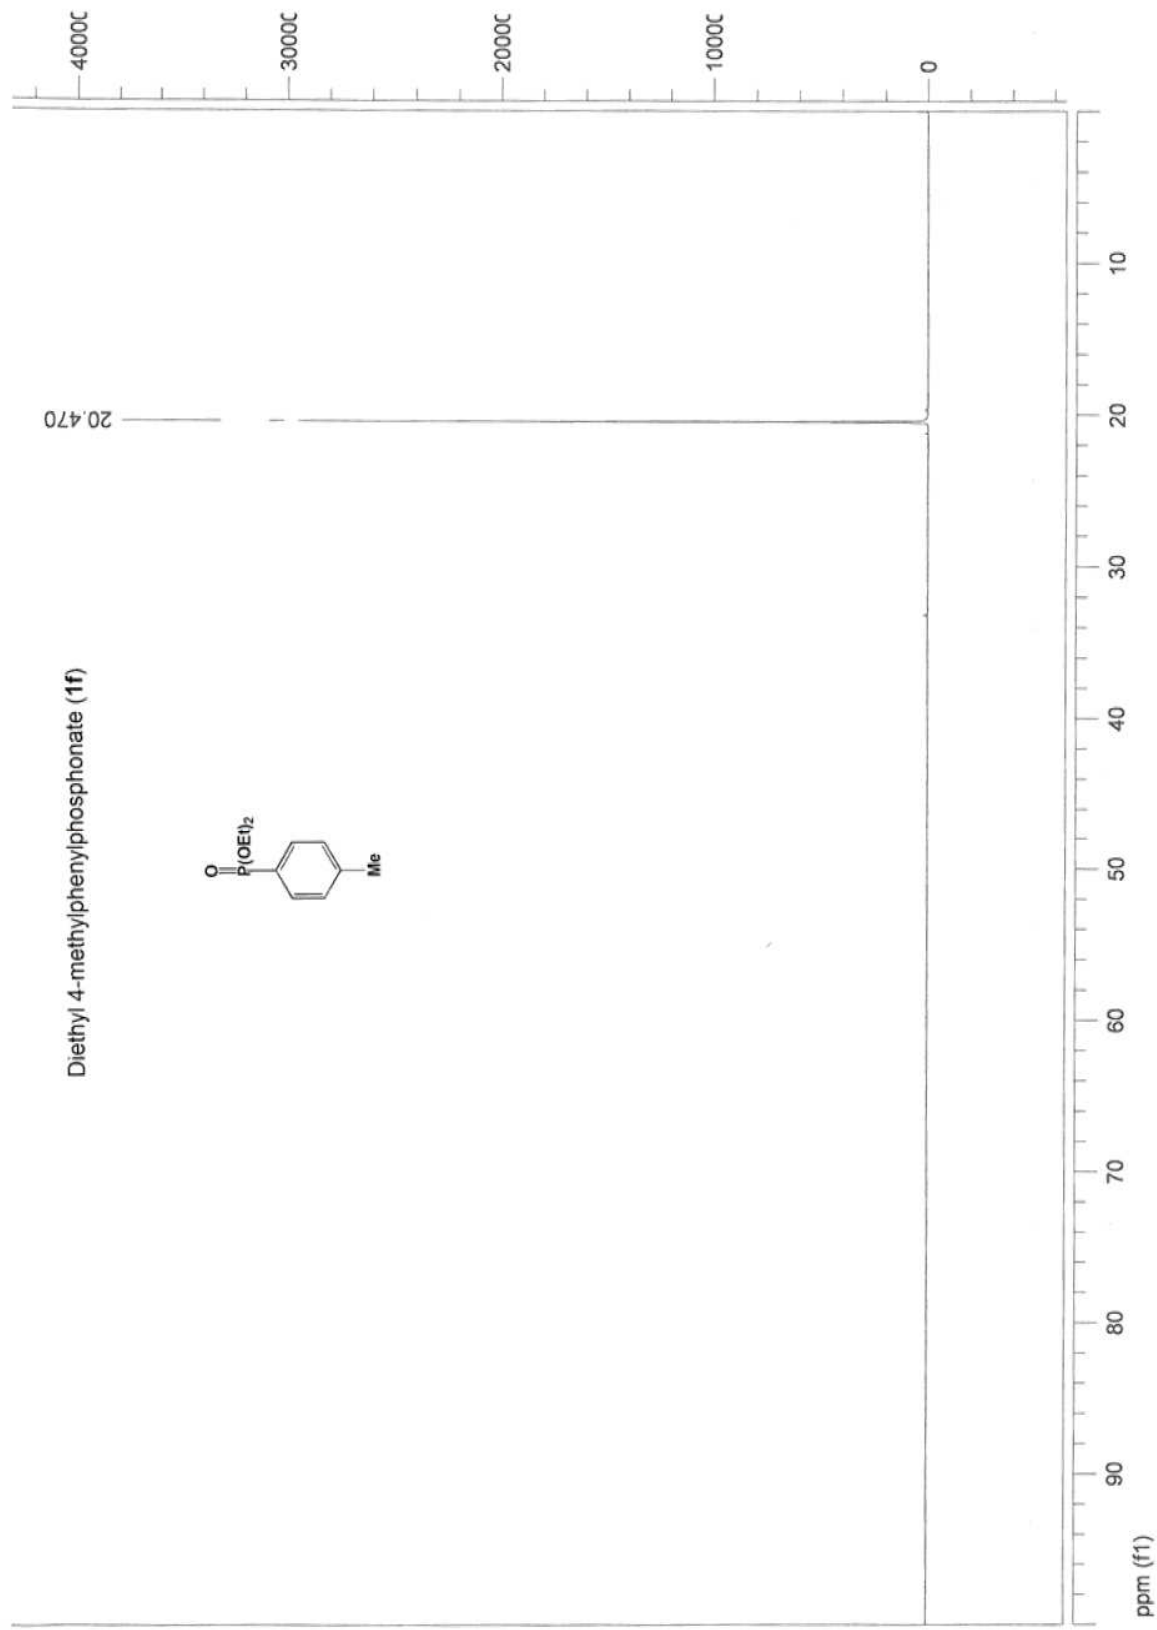

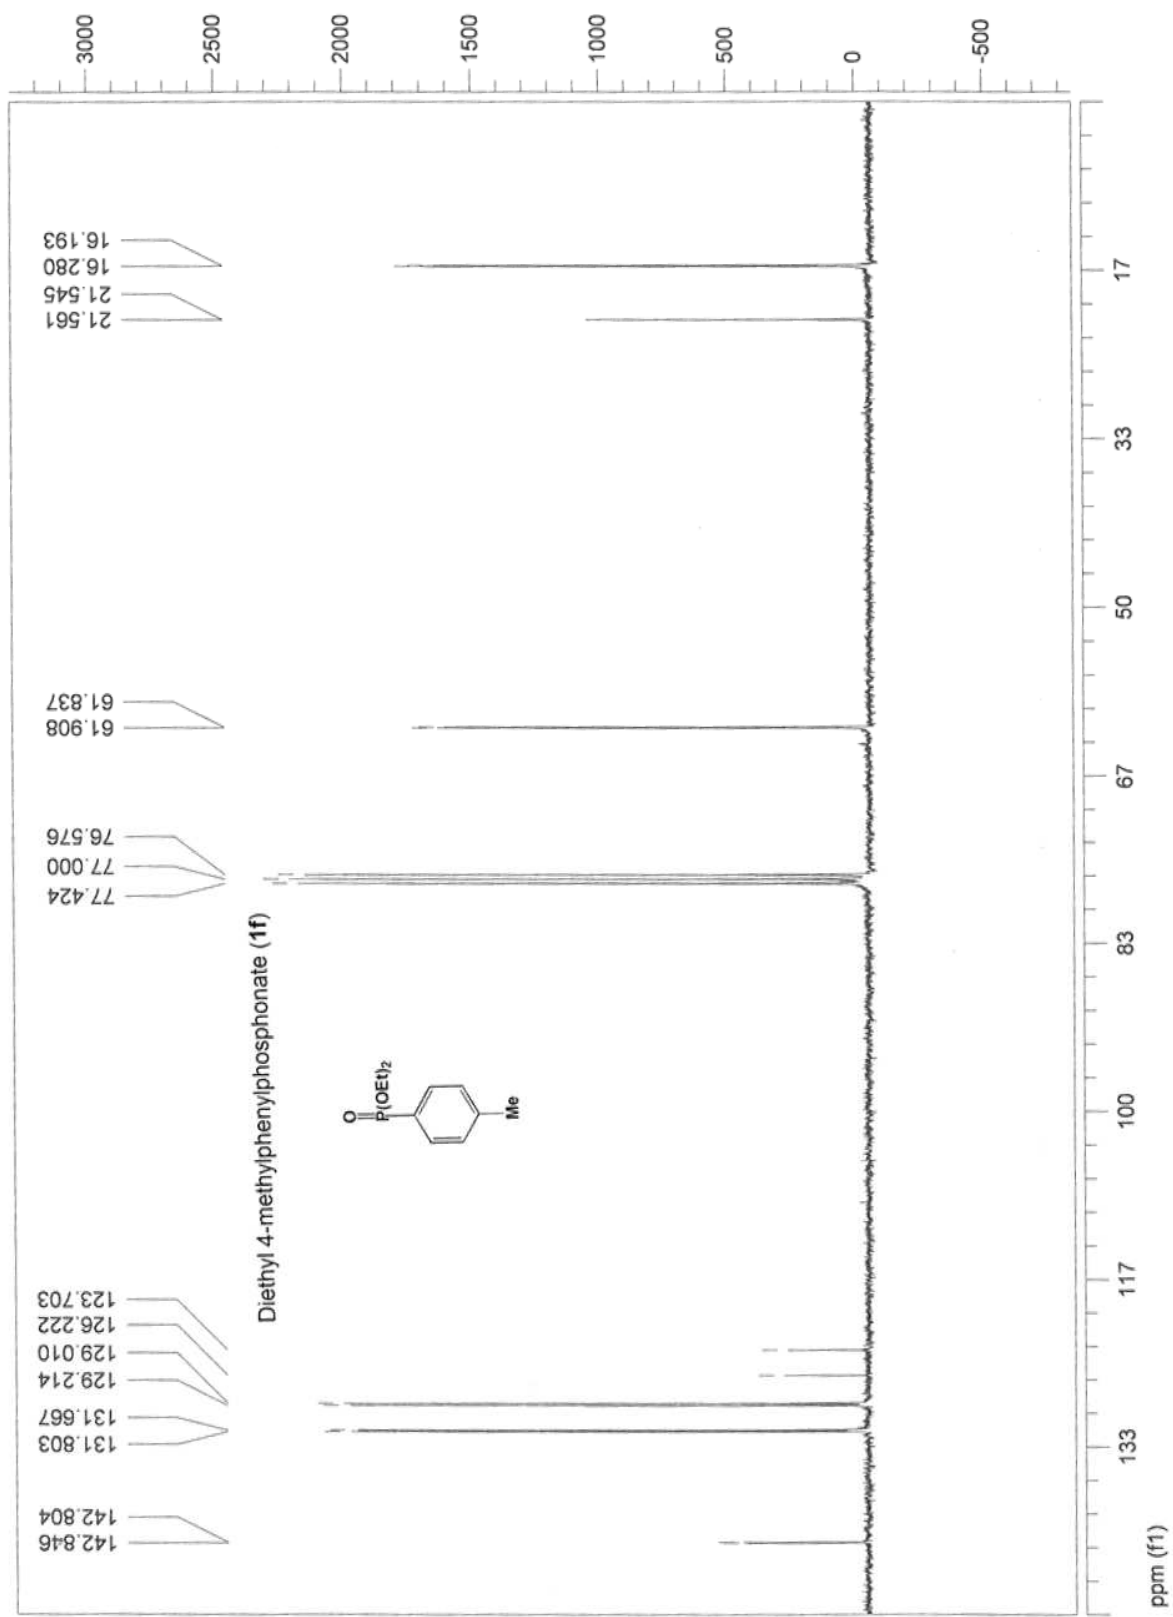

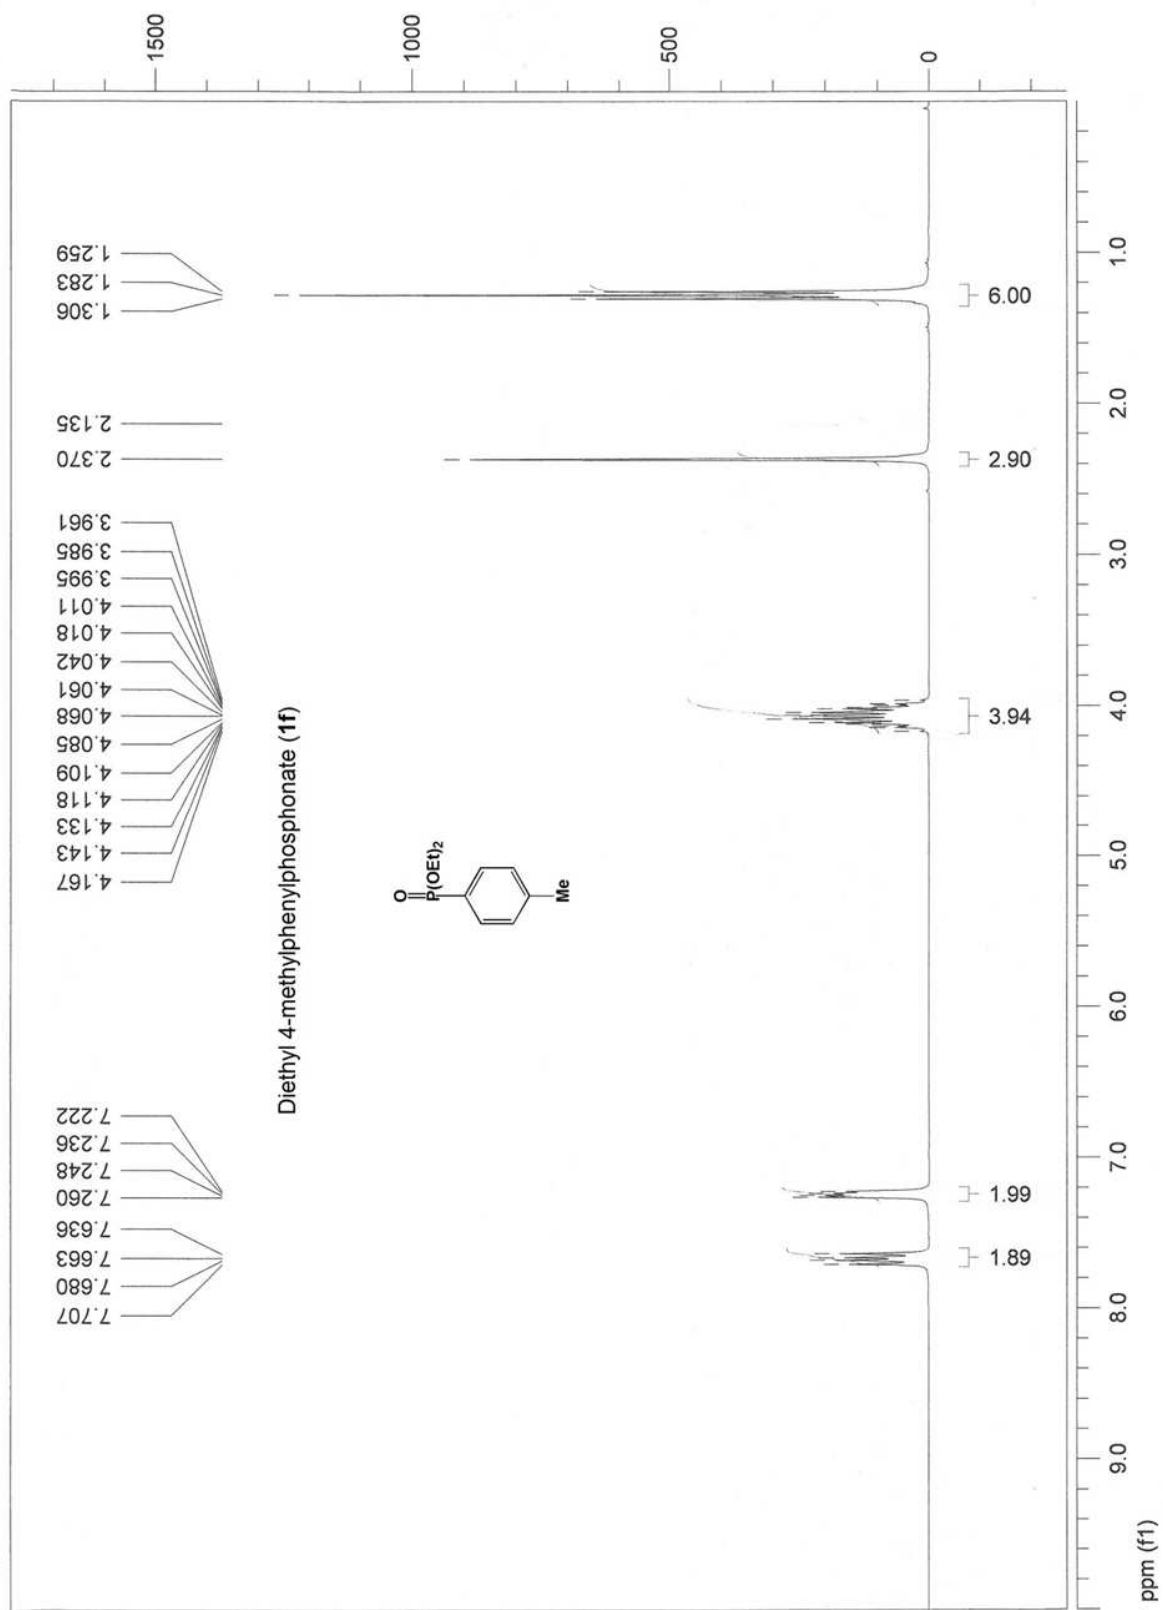

Diethyl 4-chlorophenylphosphonate (**1g**)

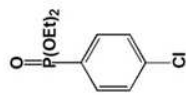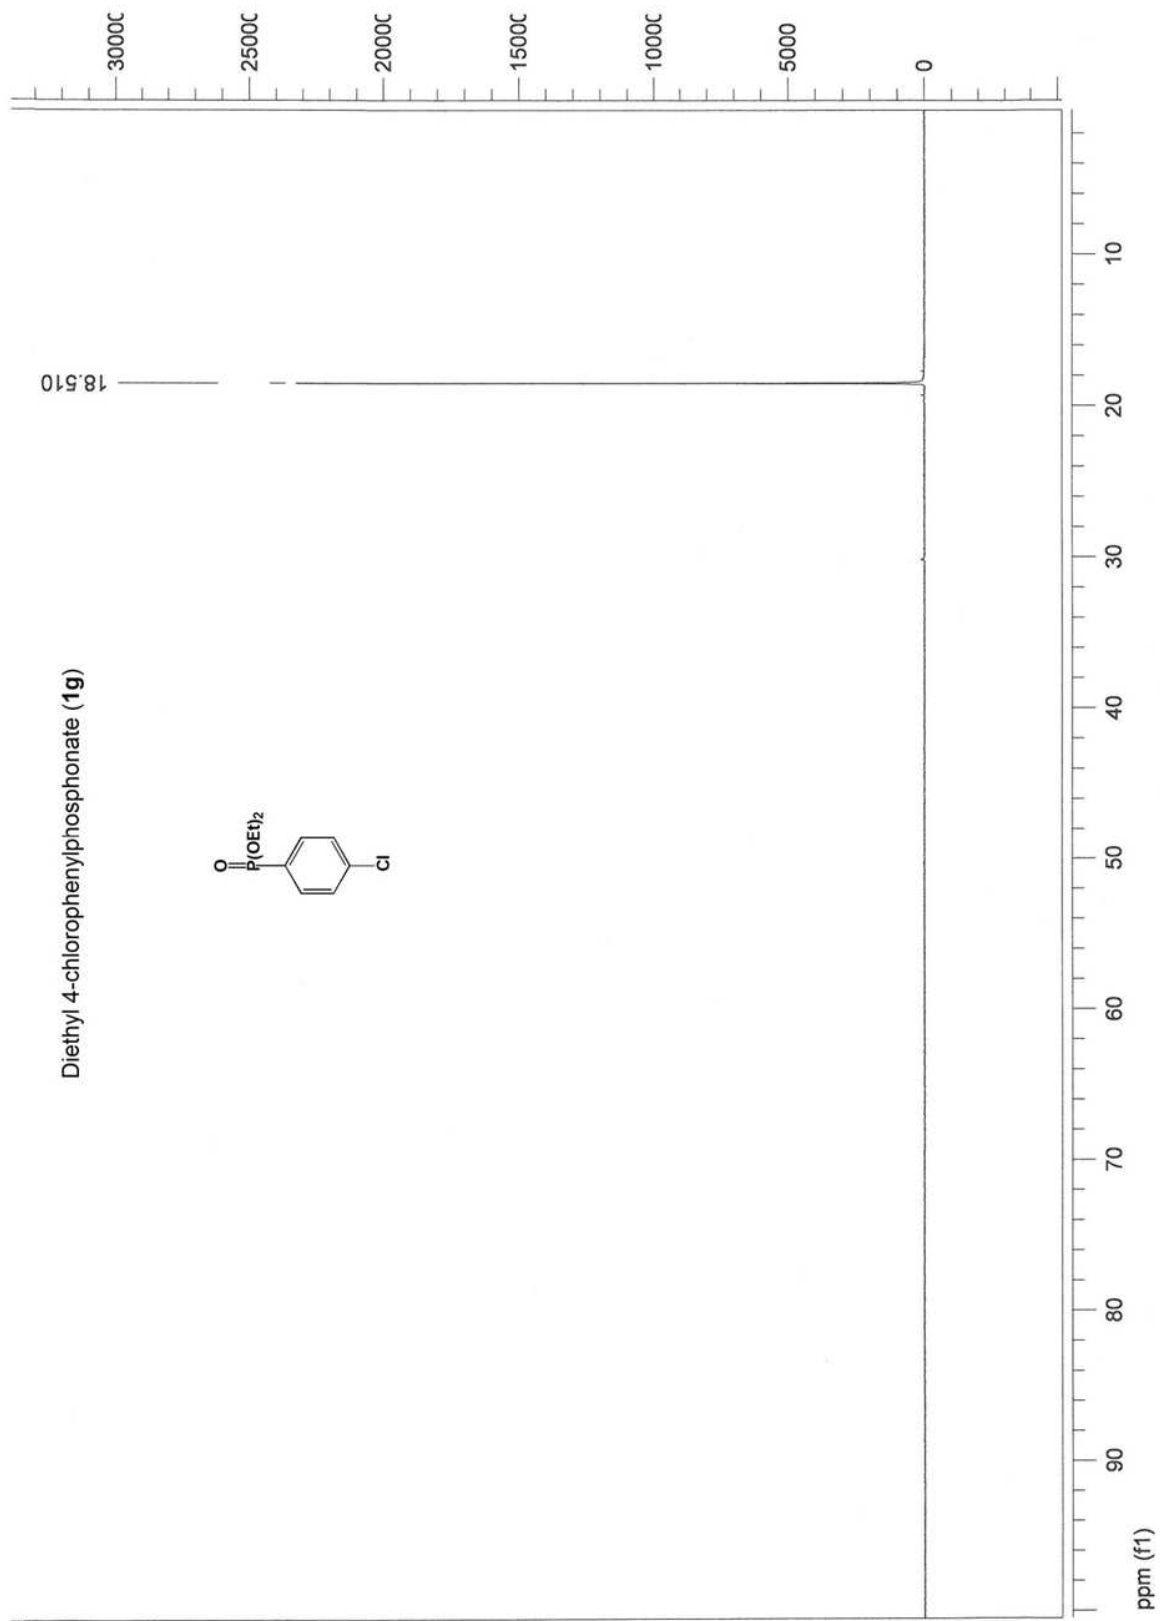

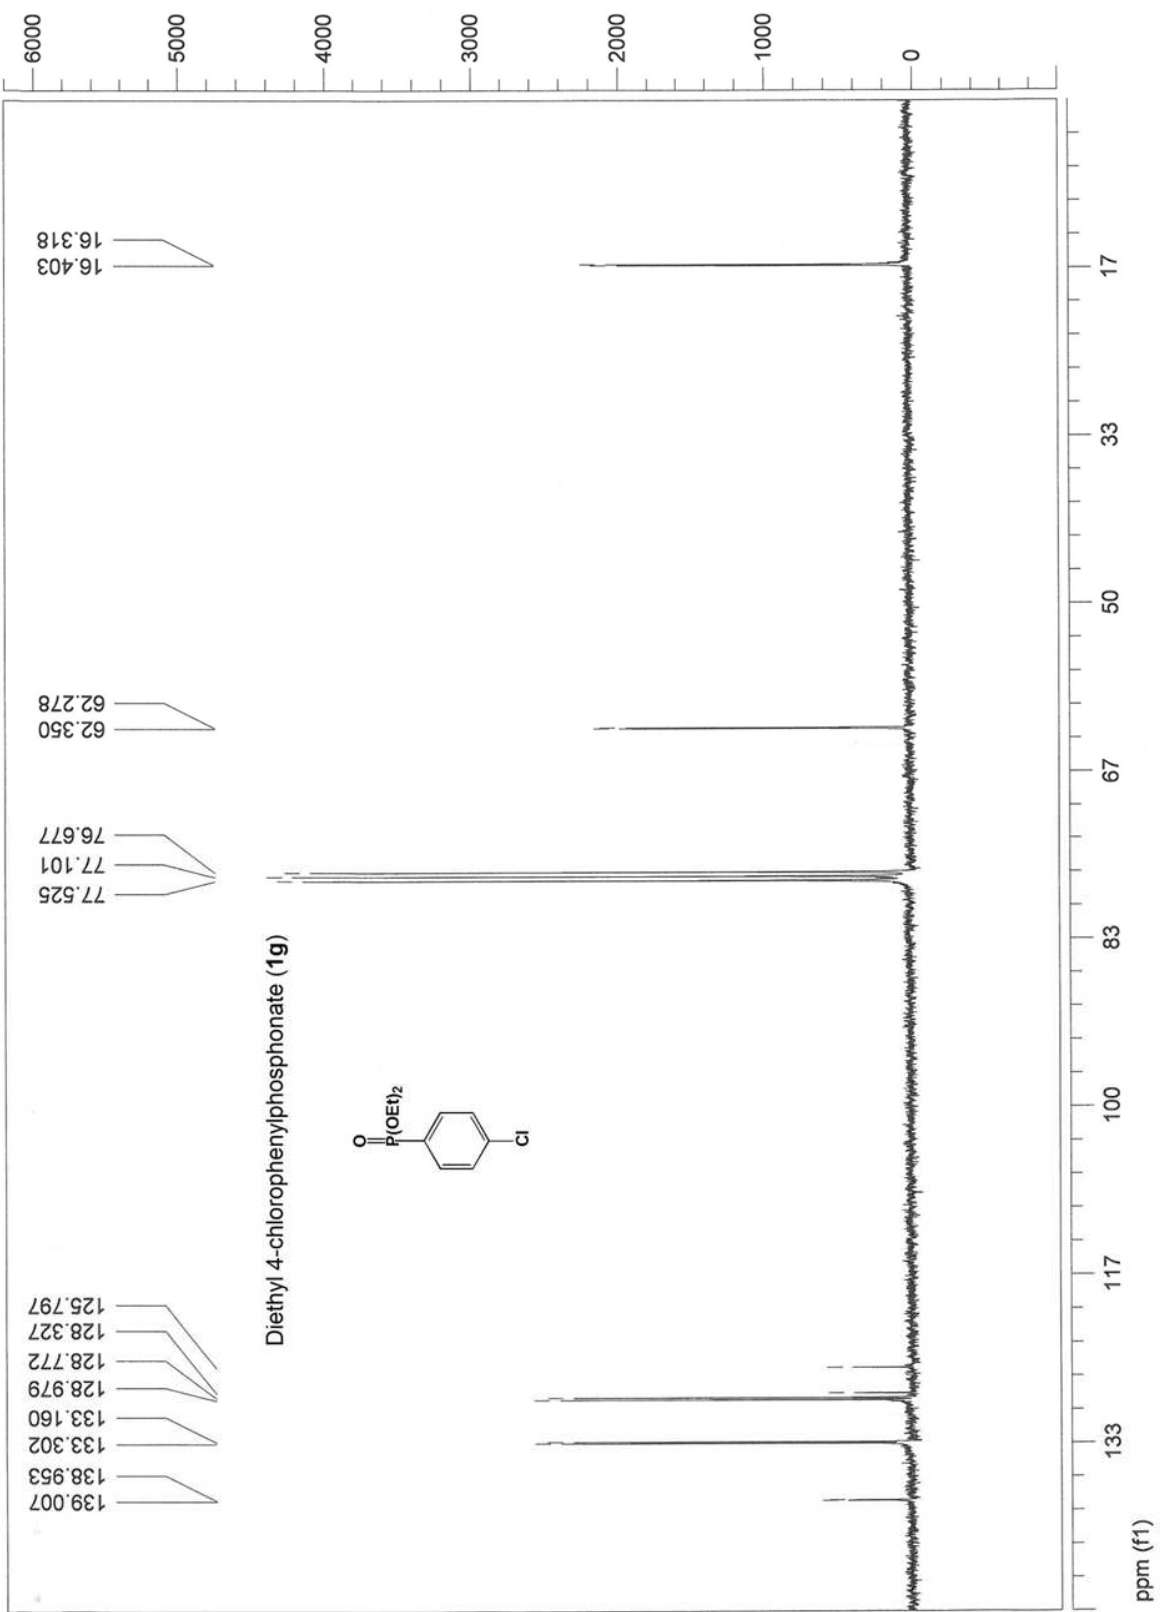

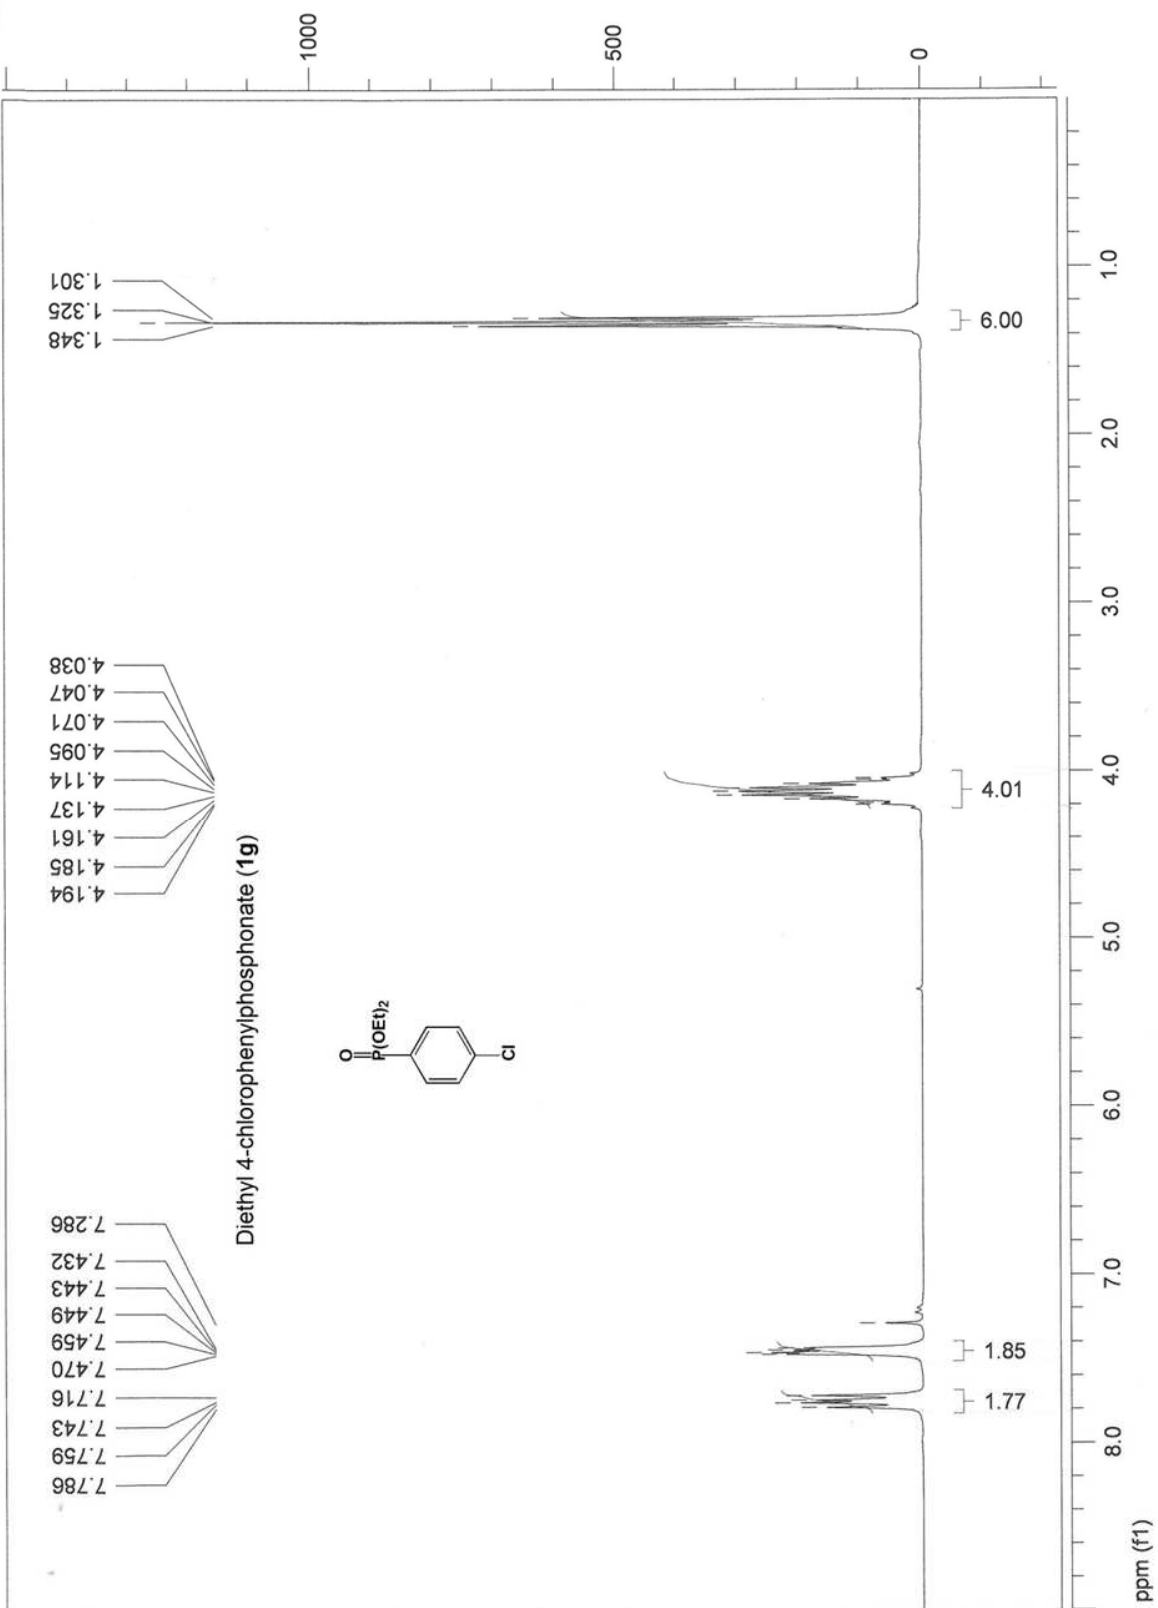

Diethyl 3-chlorophenylphosphonate (**1h**)

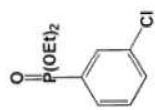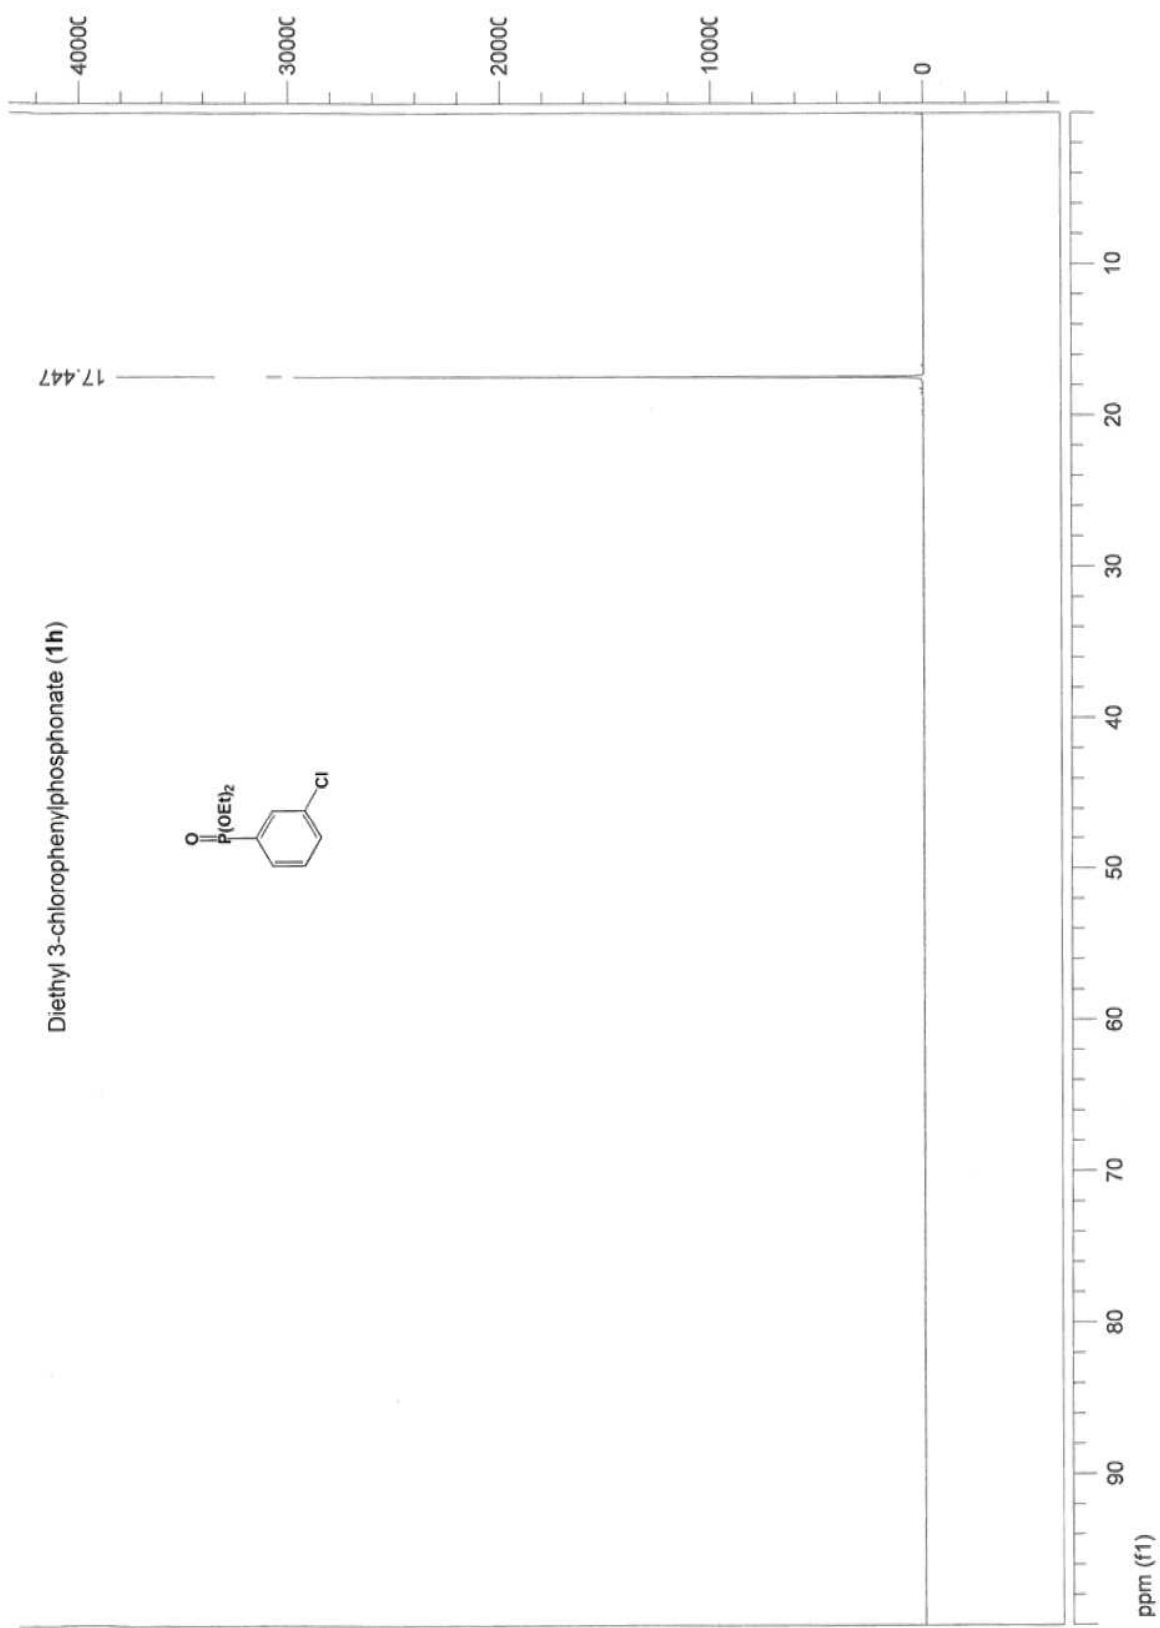

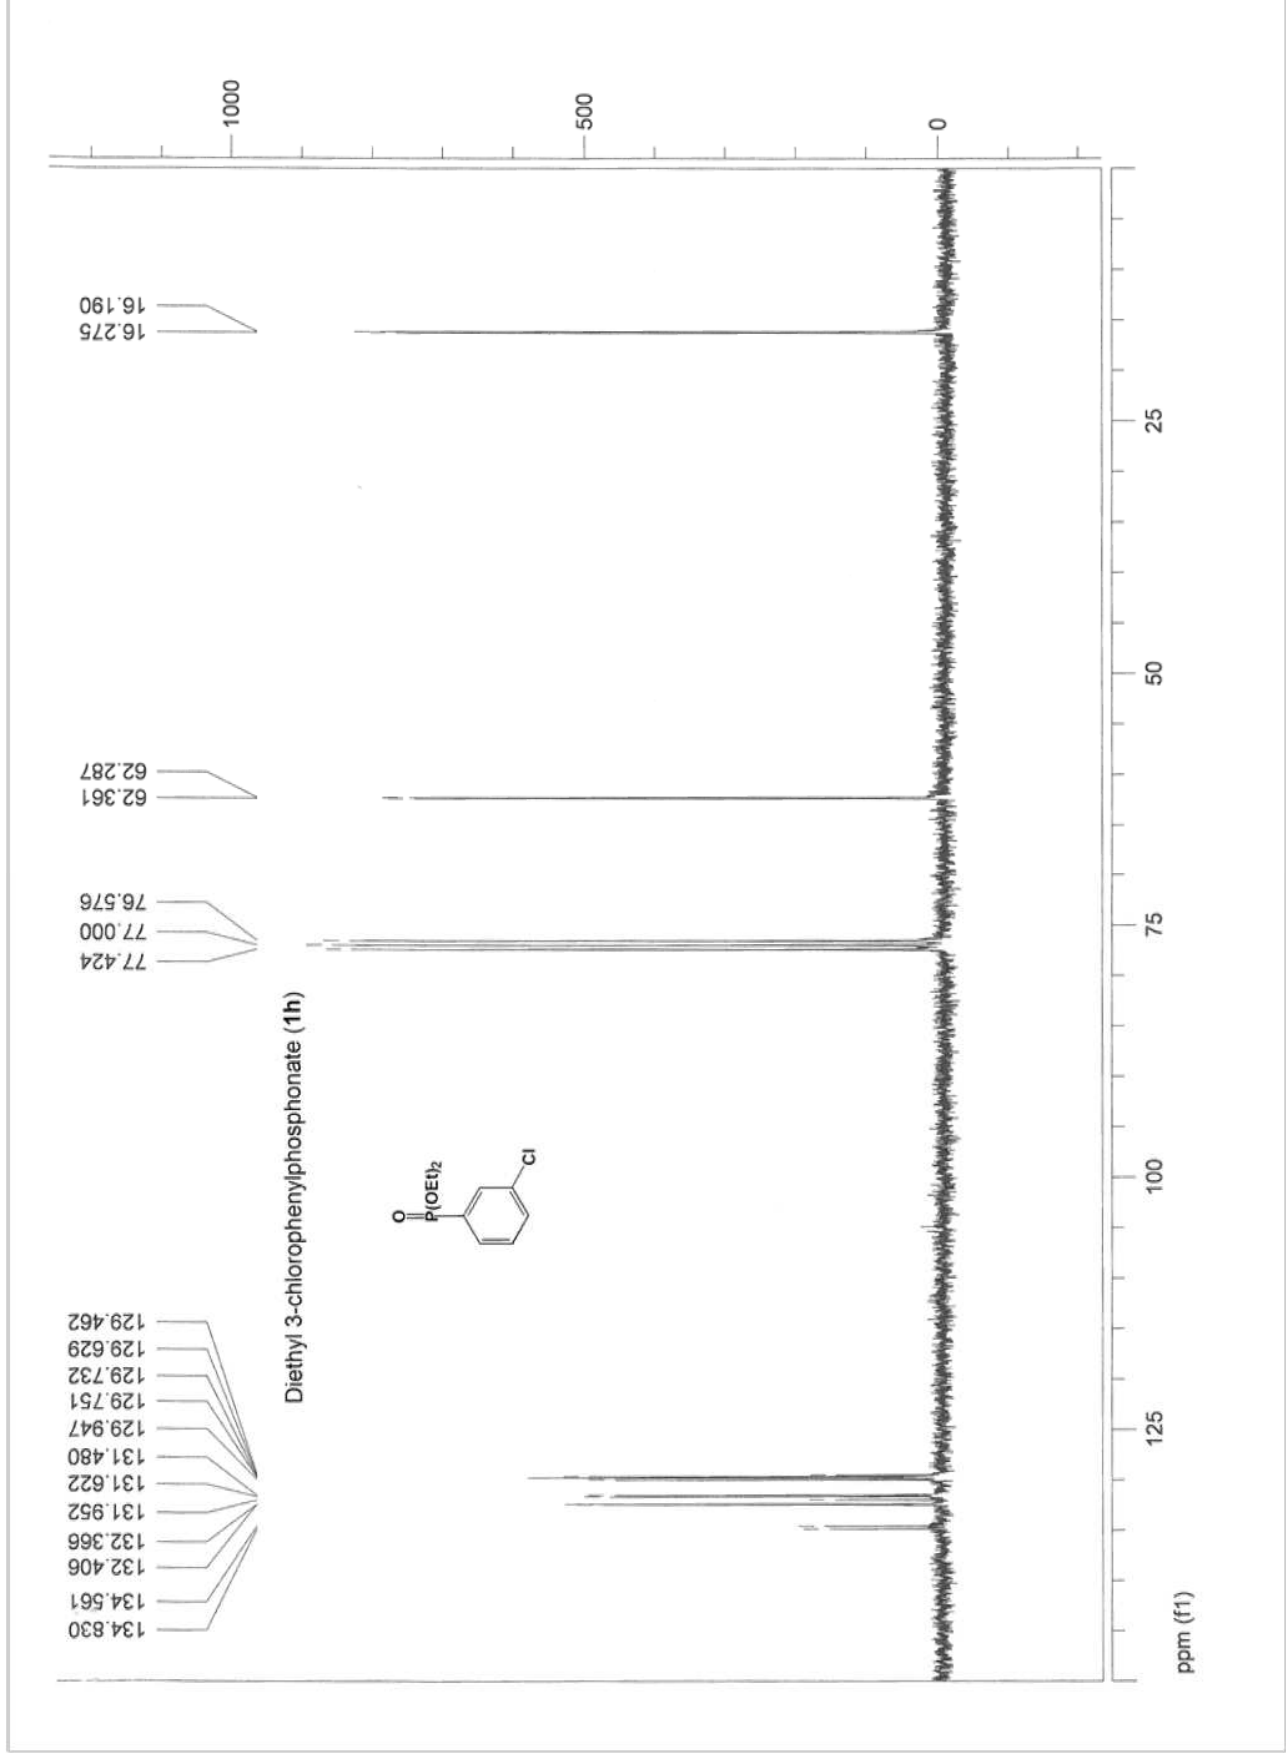



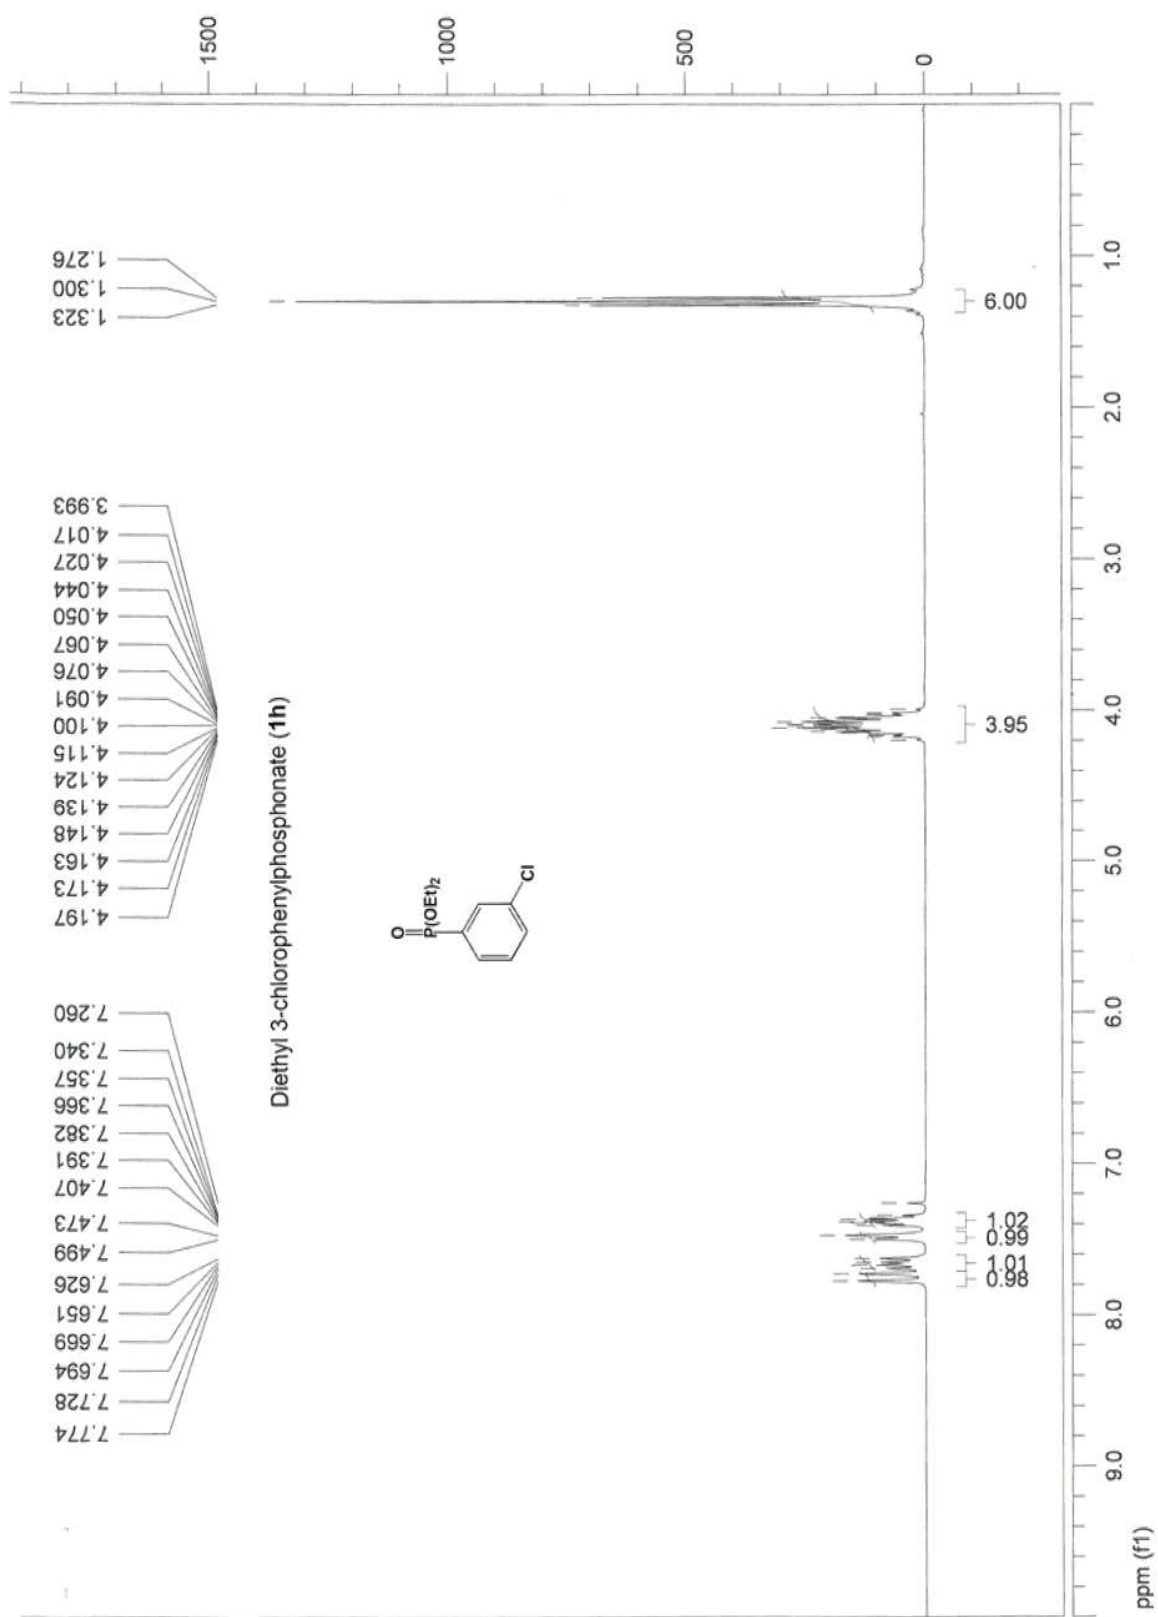

Diethyl 4-fluorophenylphosphonate (**1i**)

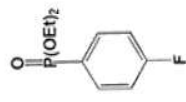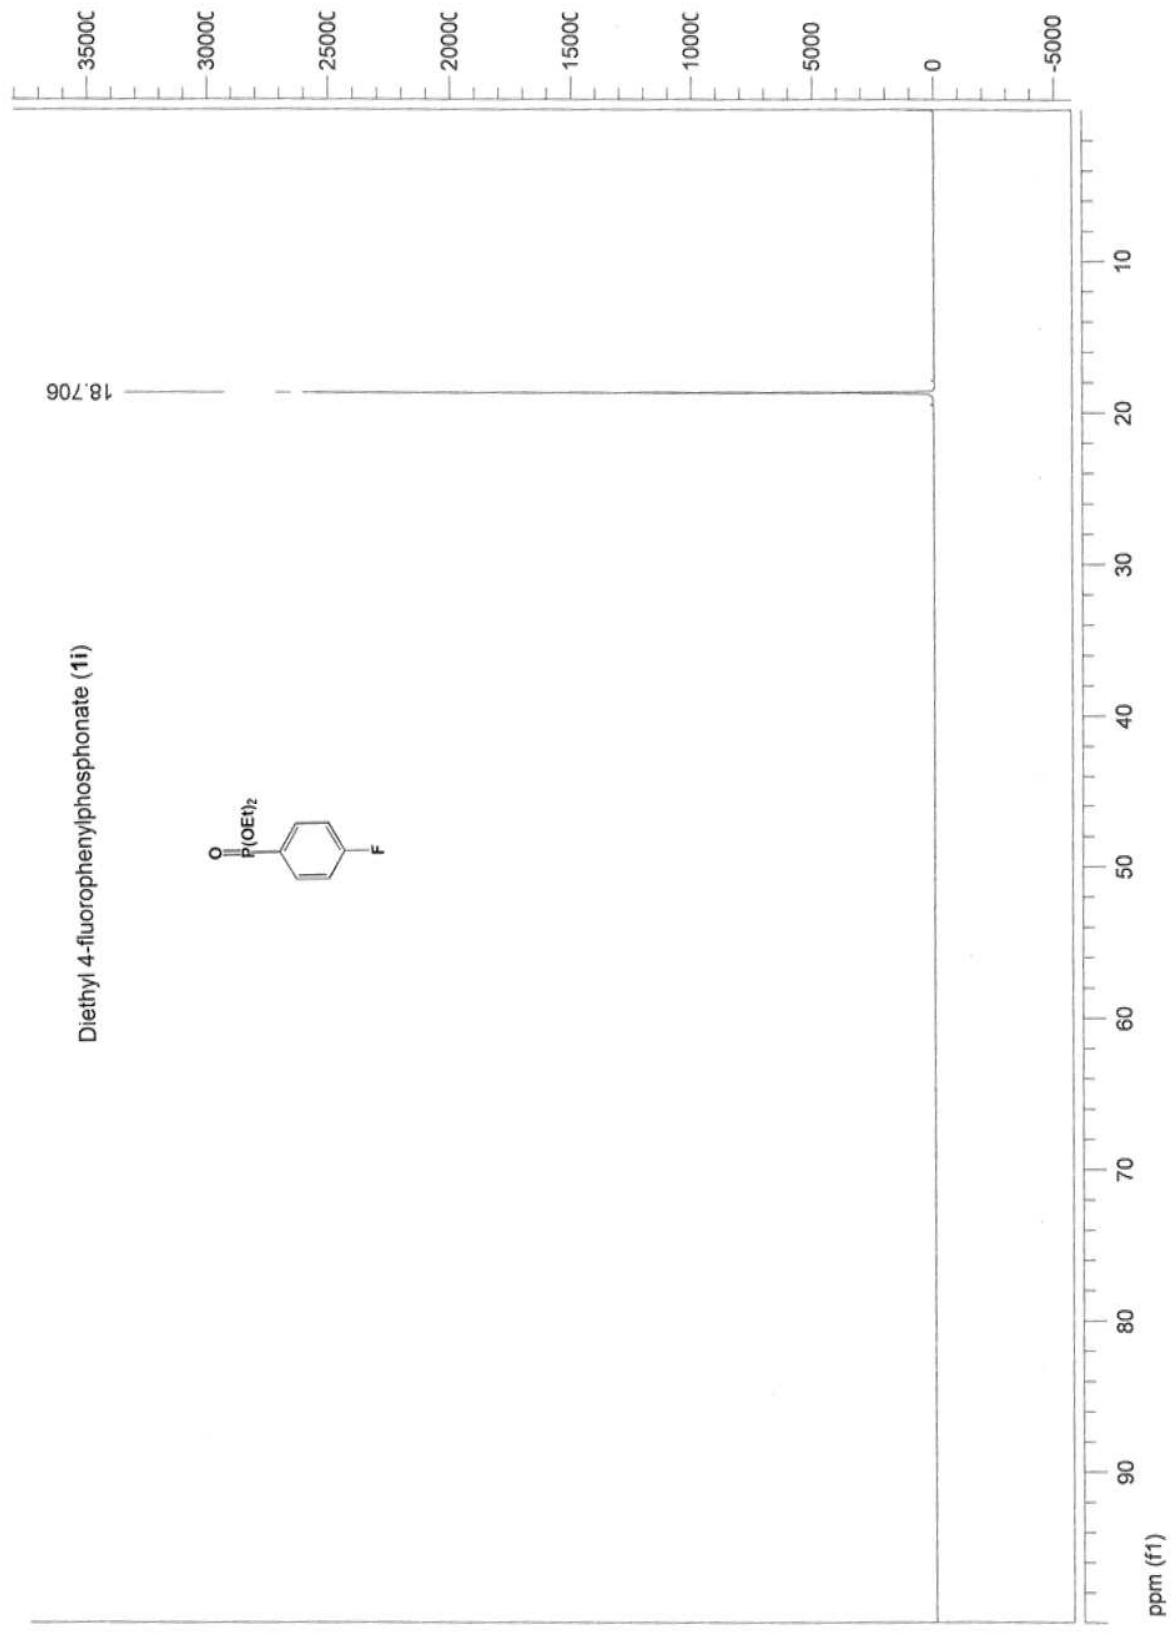

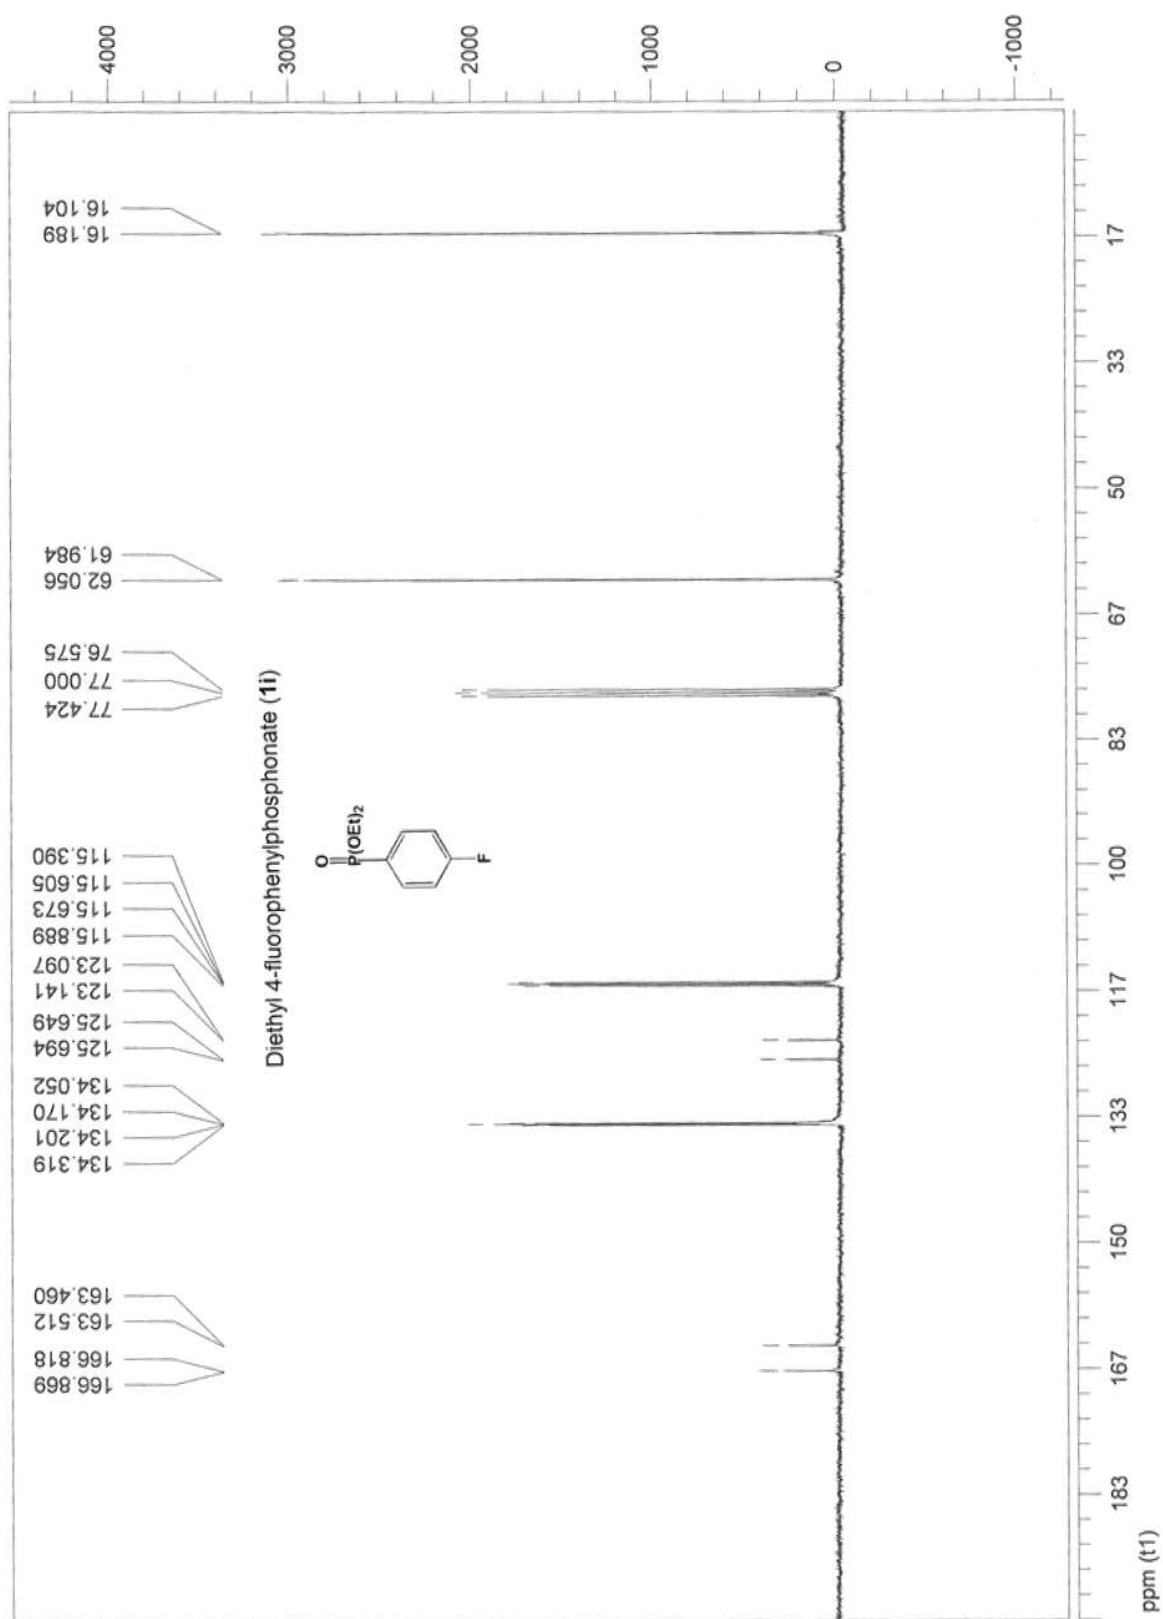

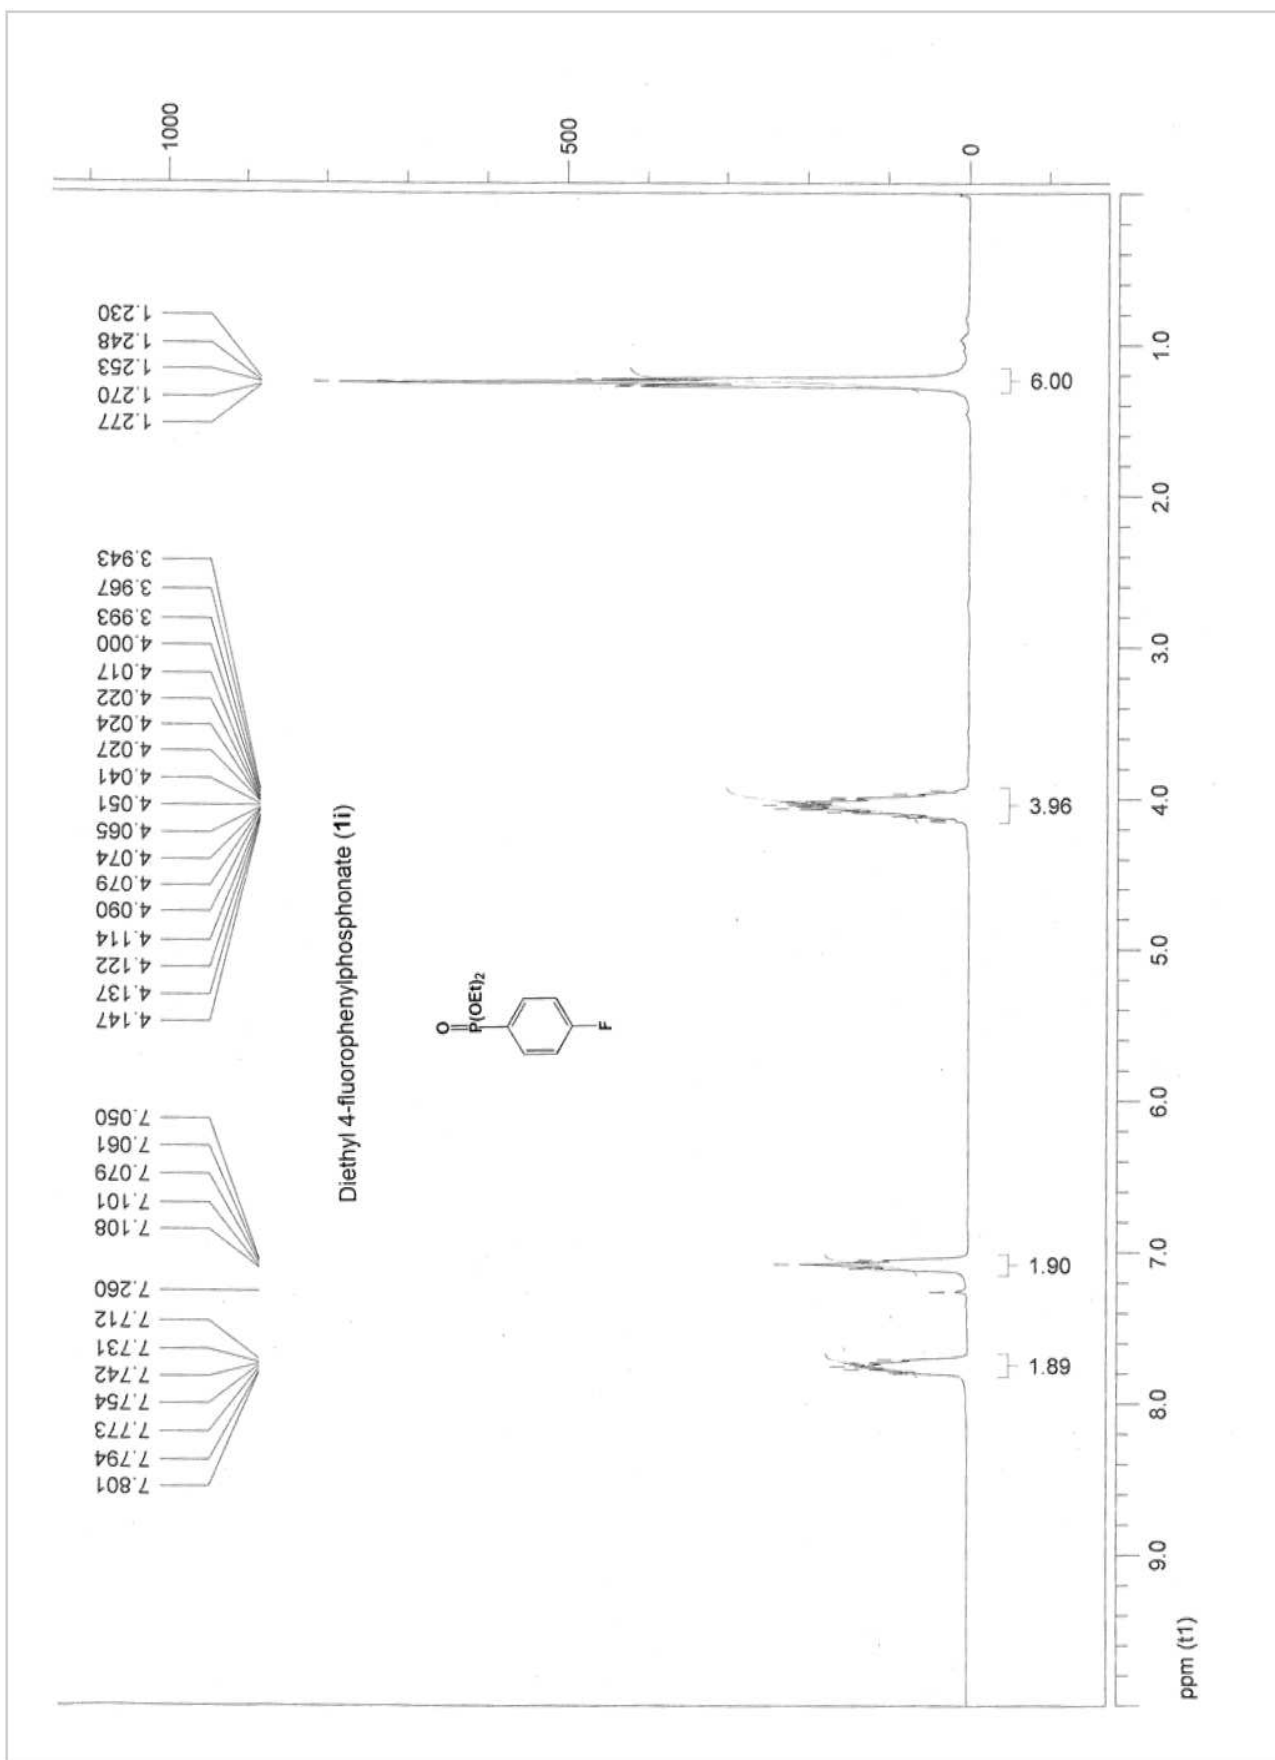

Diethyl 3-fluorophenylphosphonate (1j)

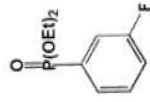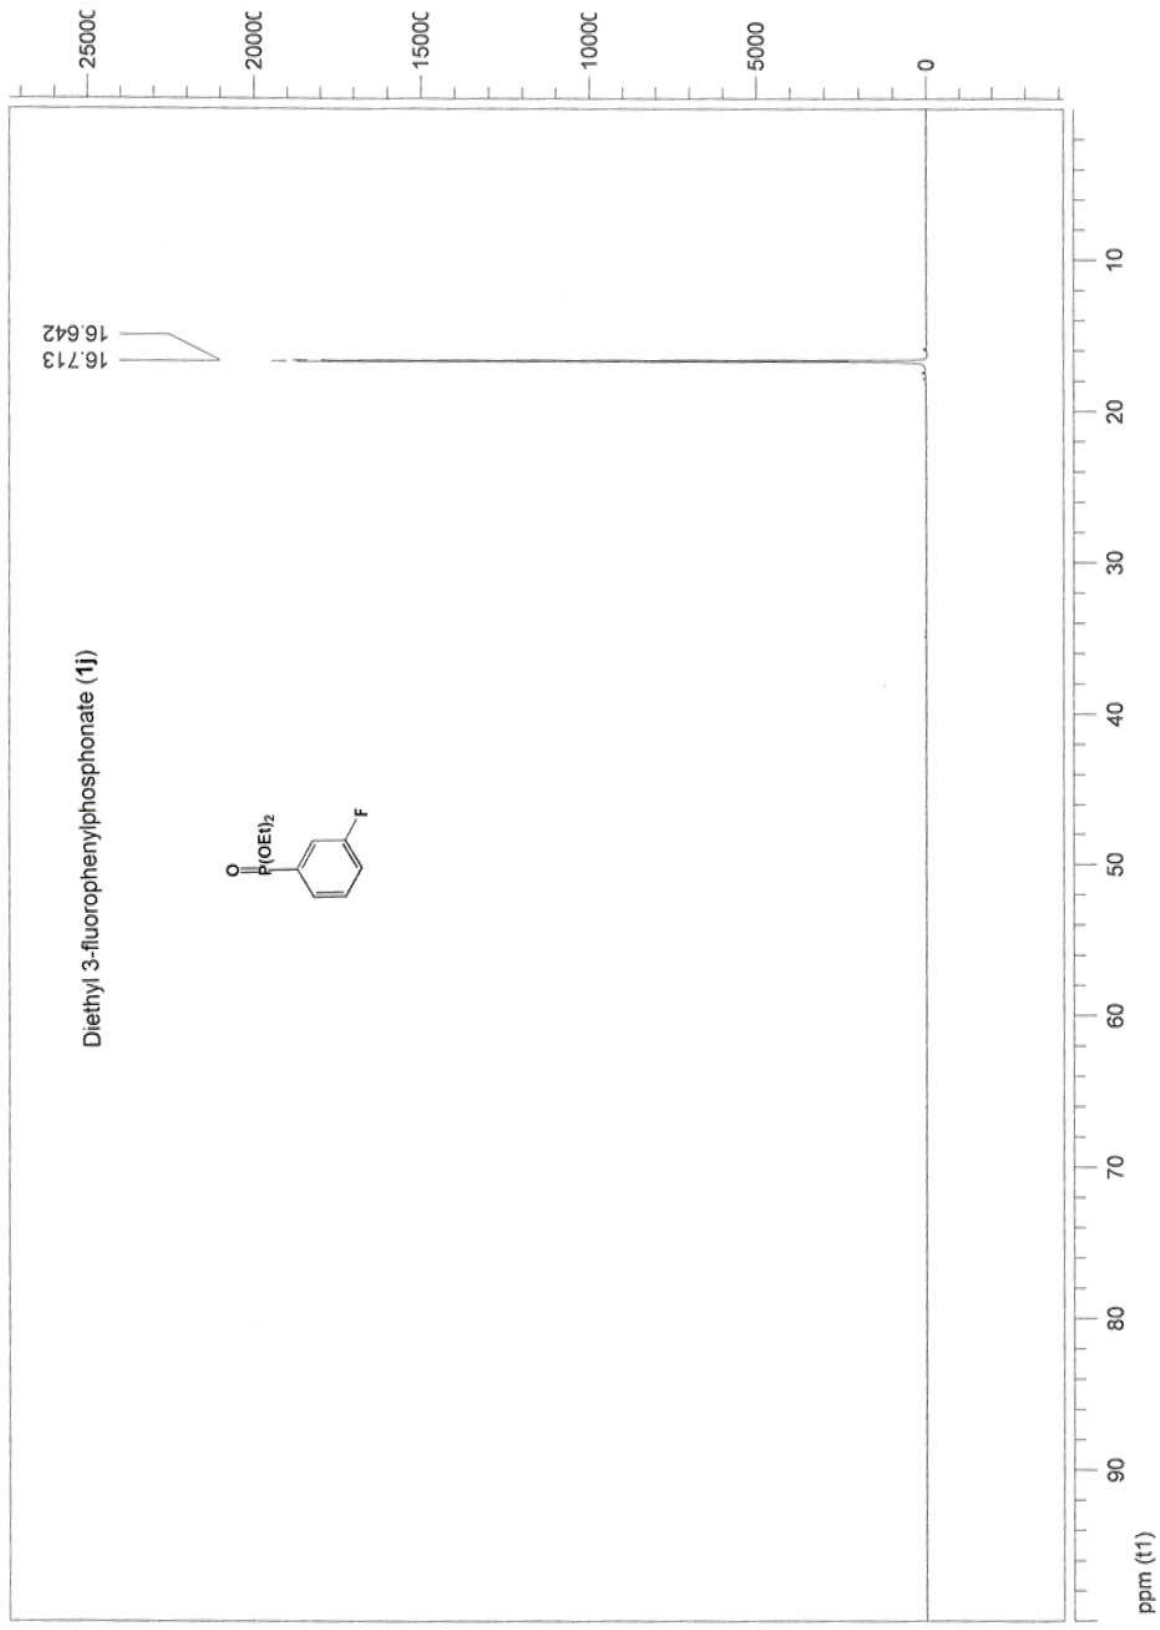

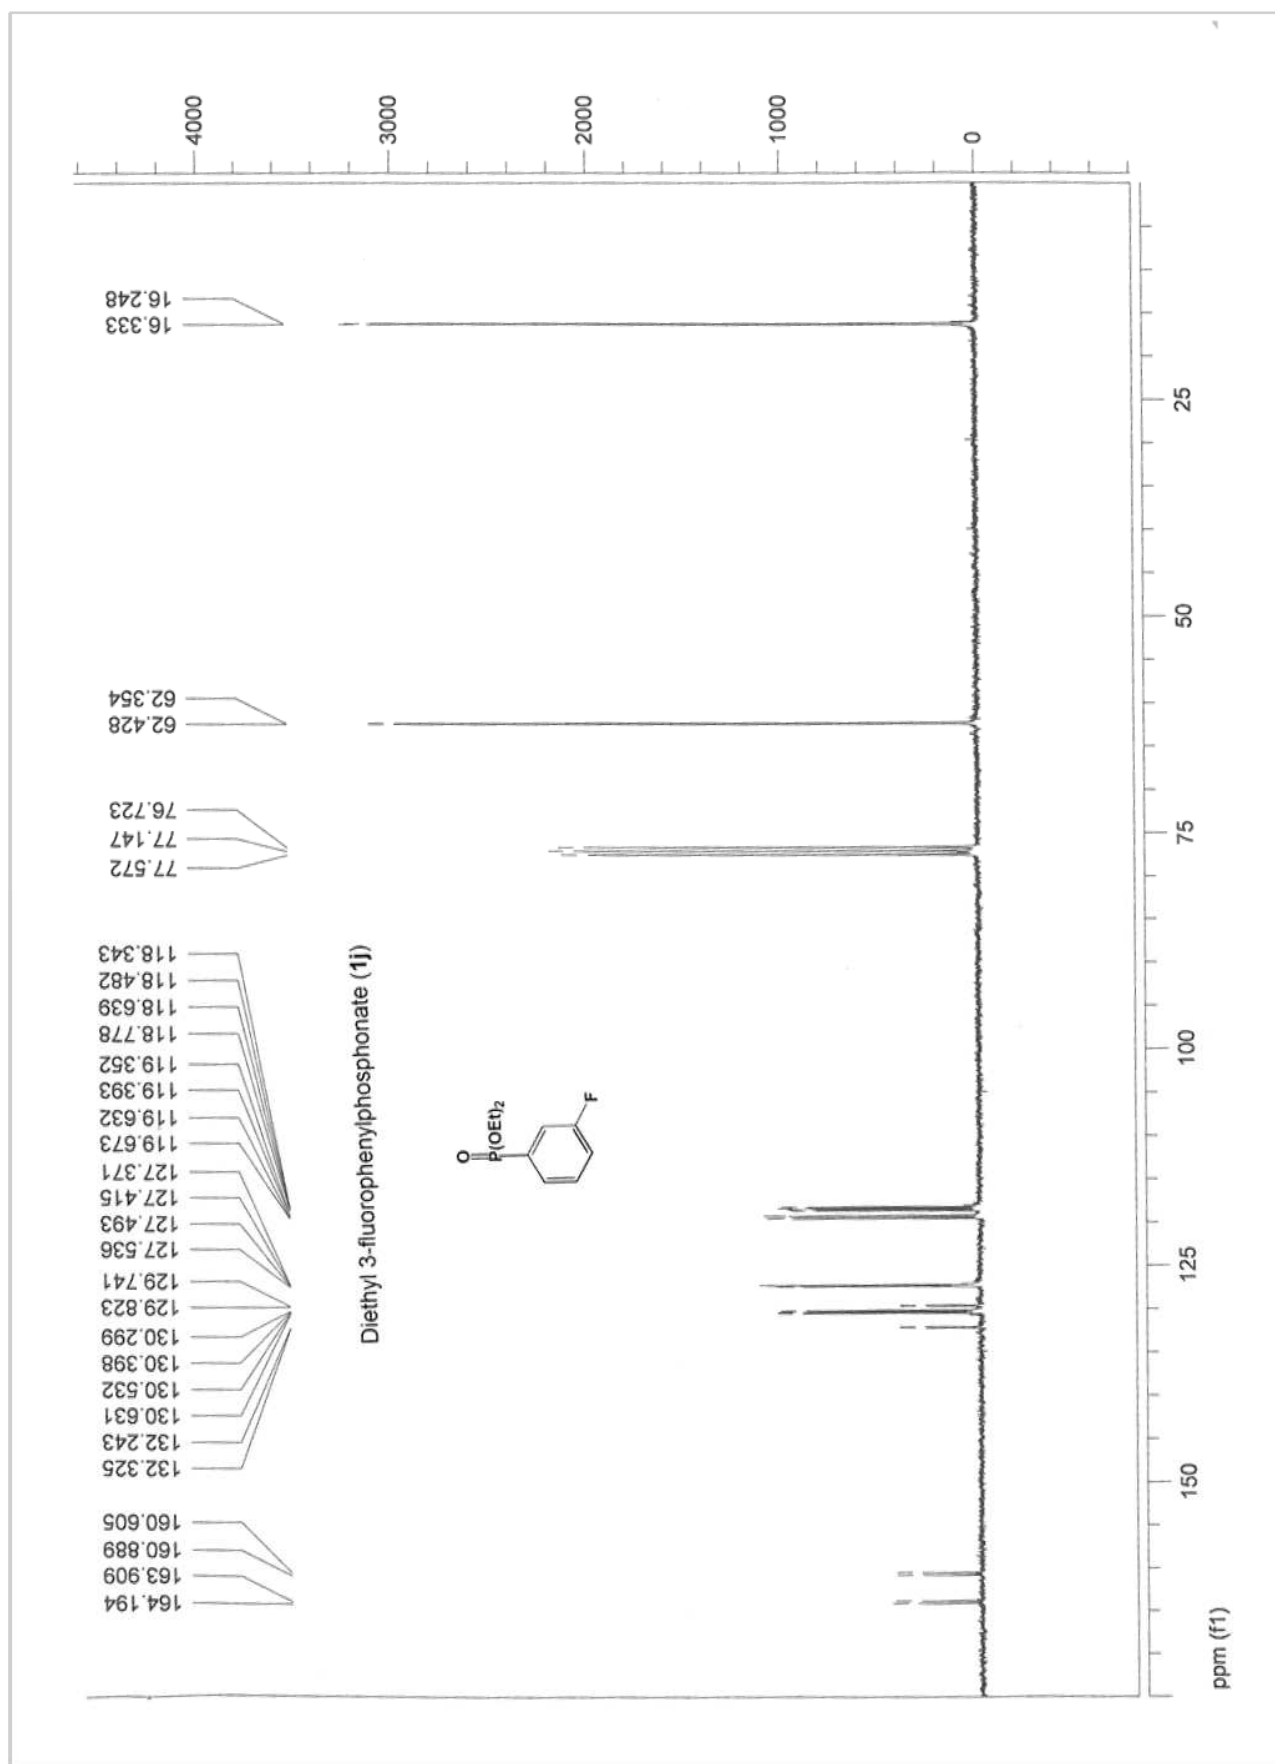

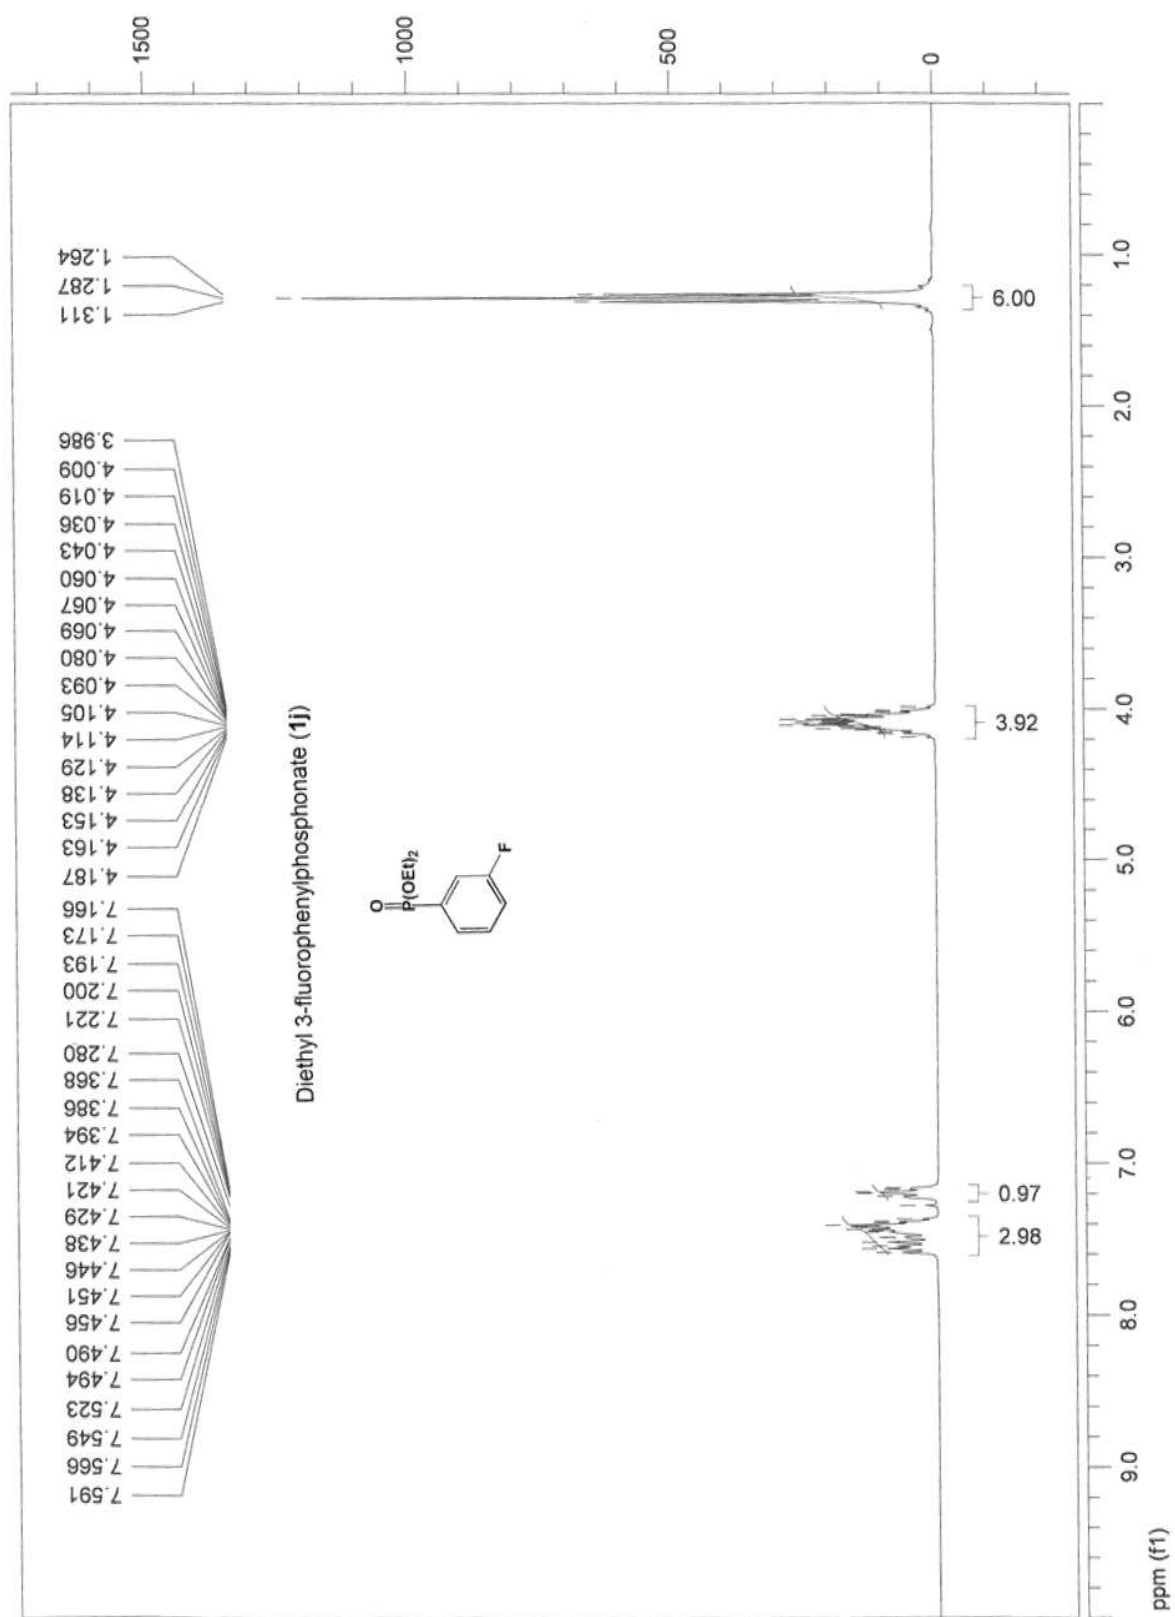

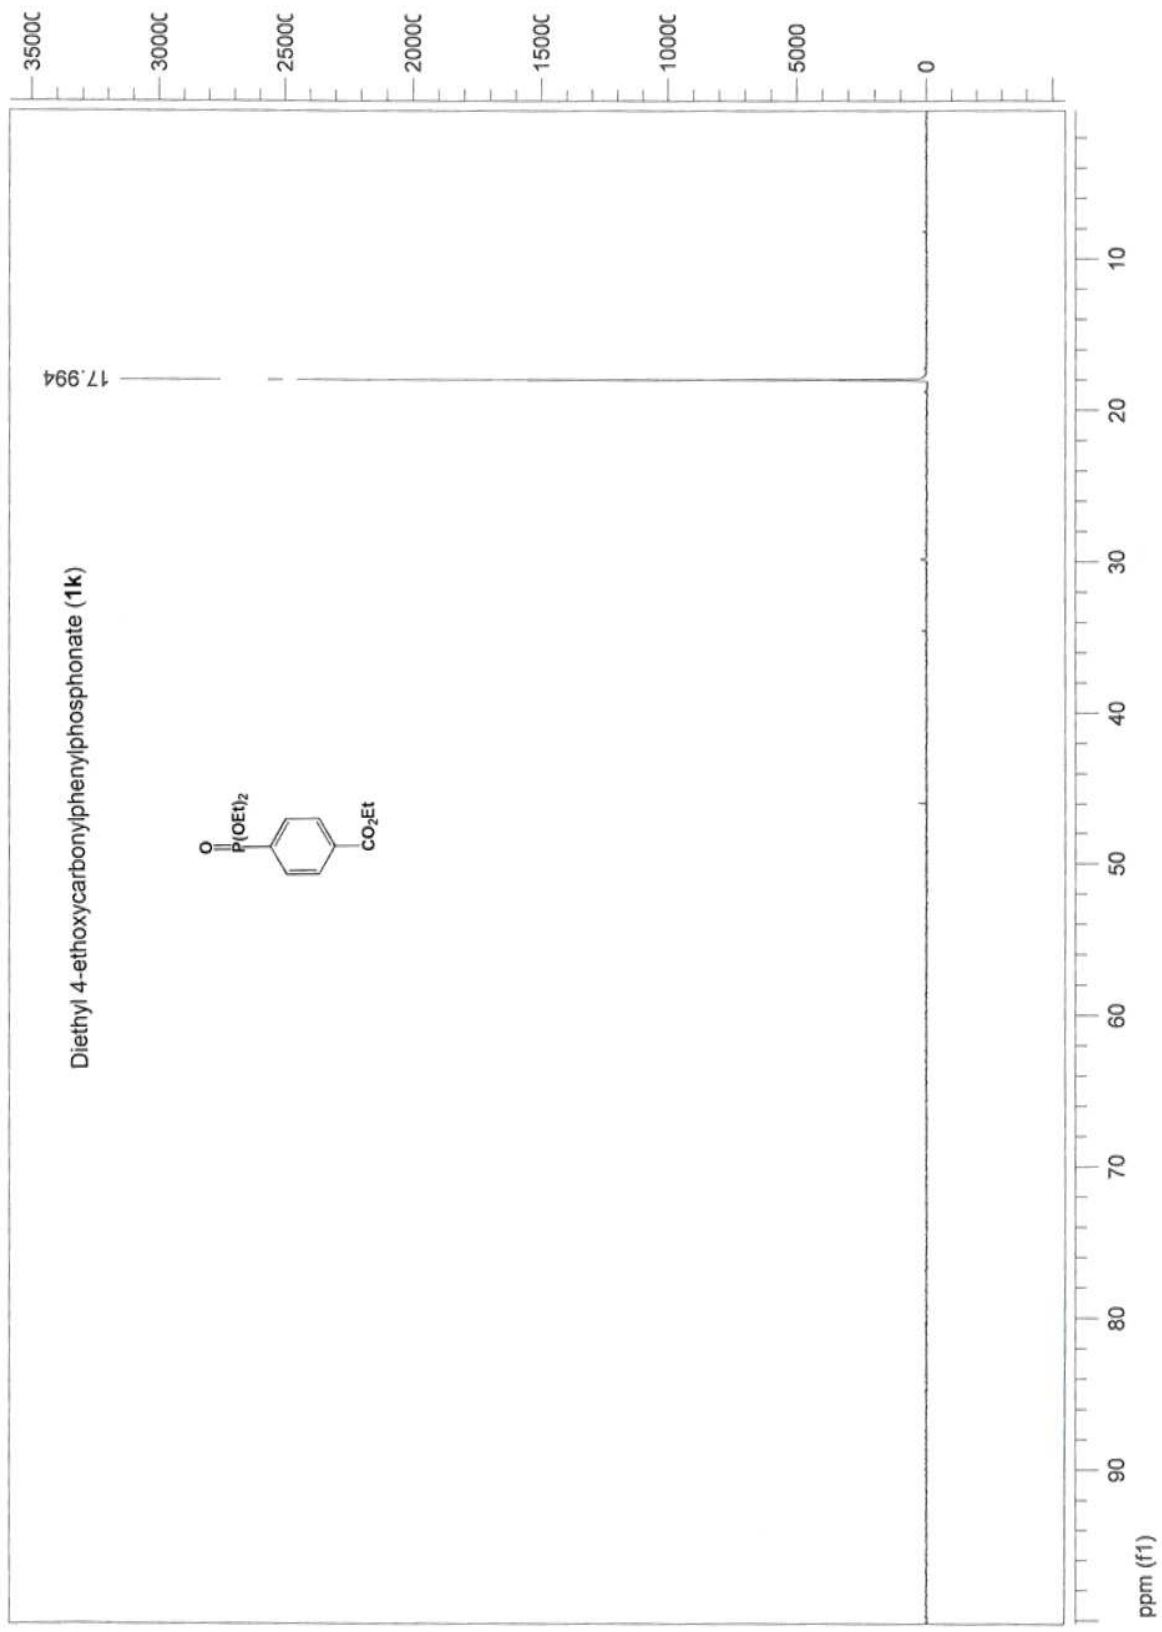



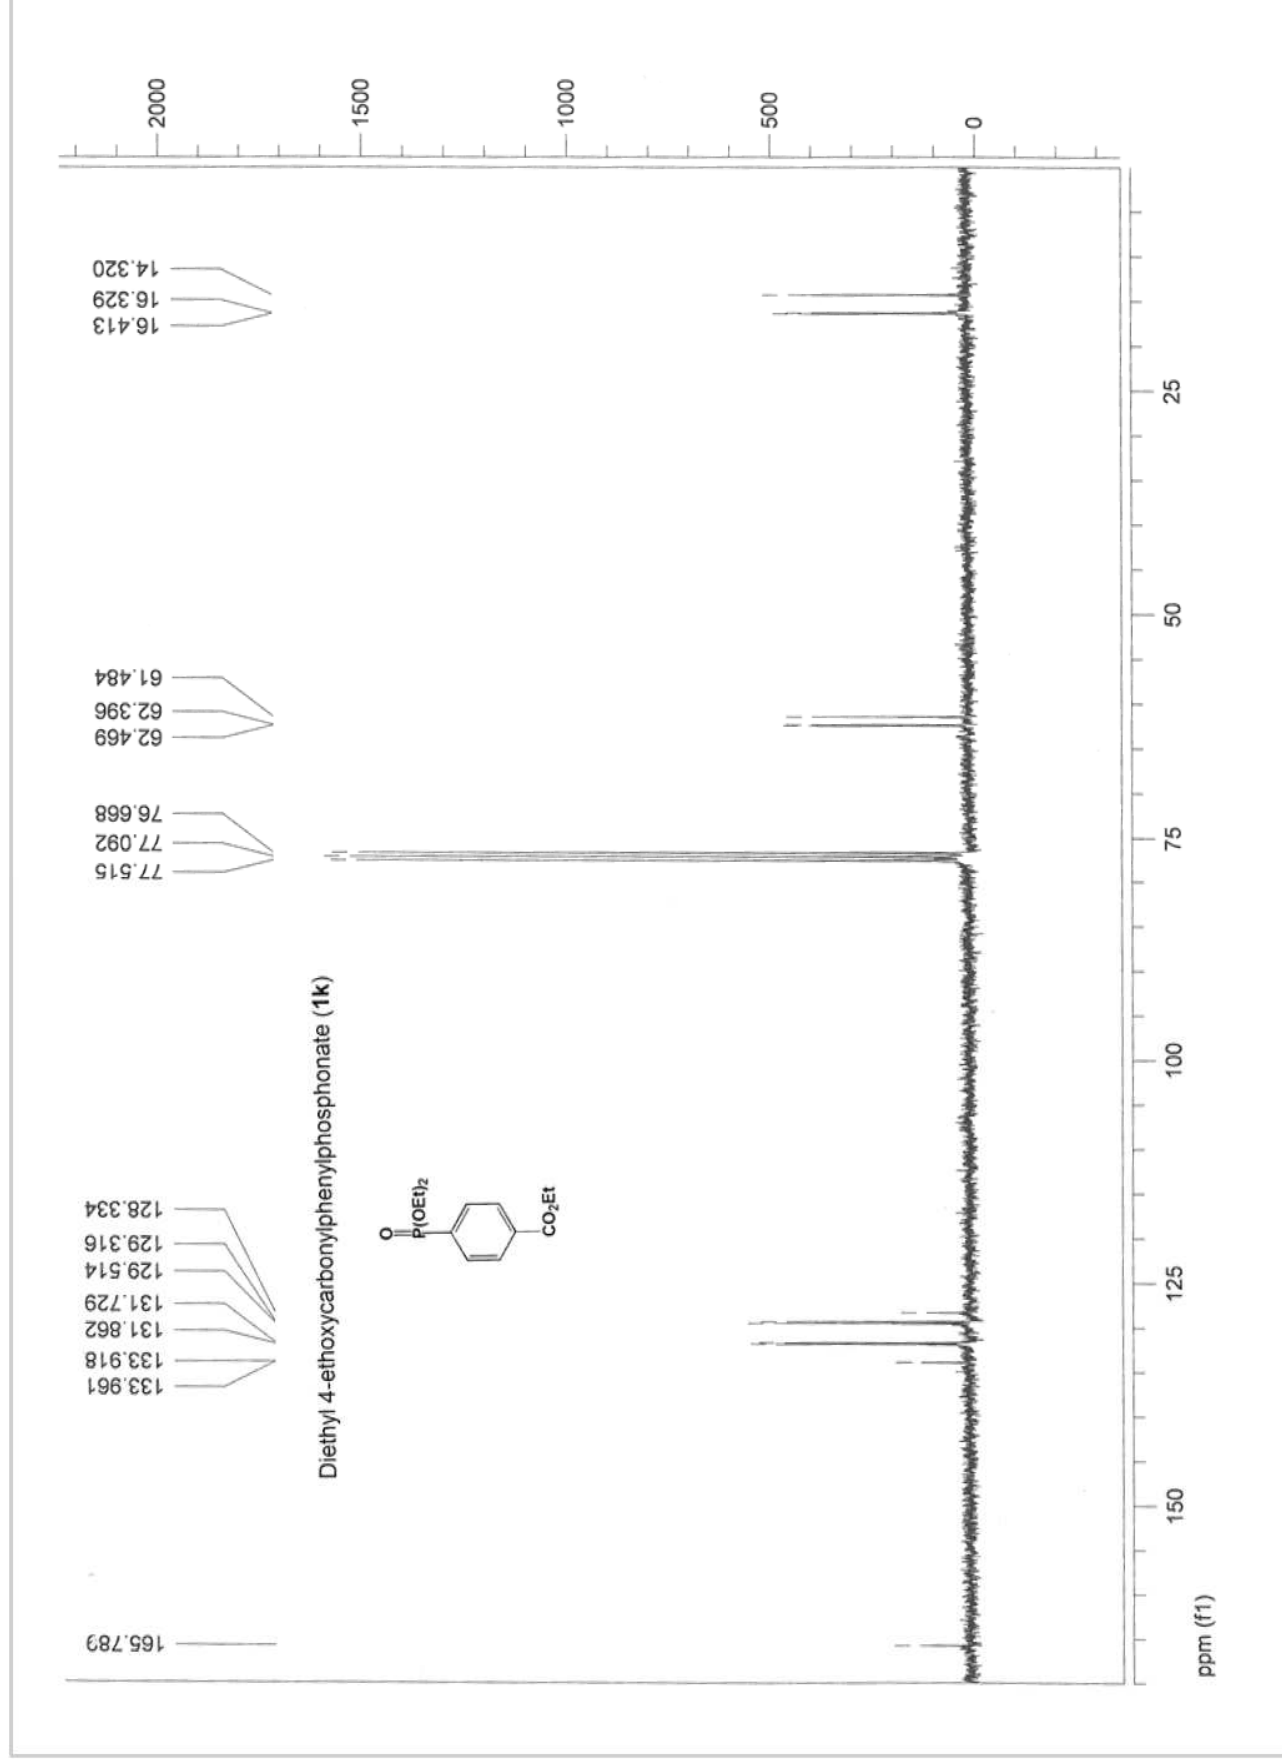

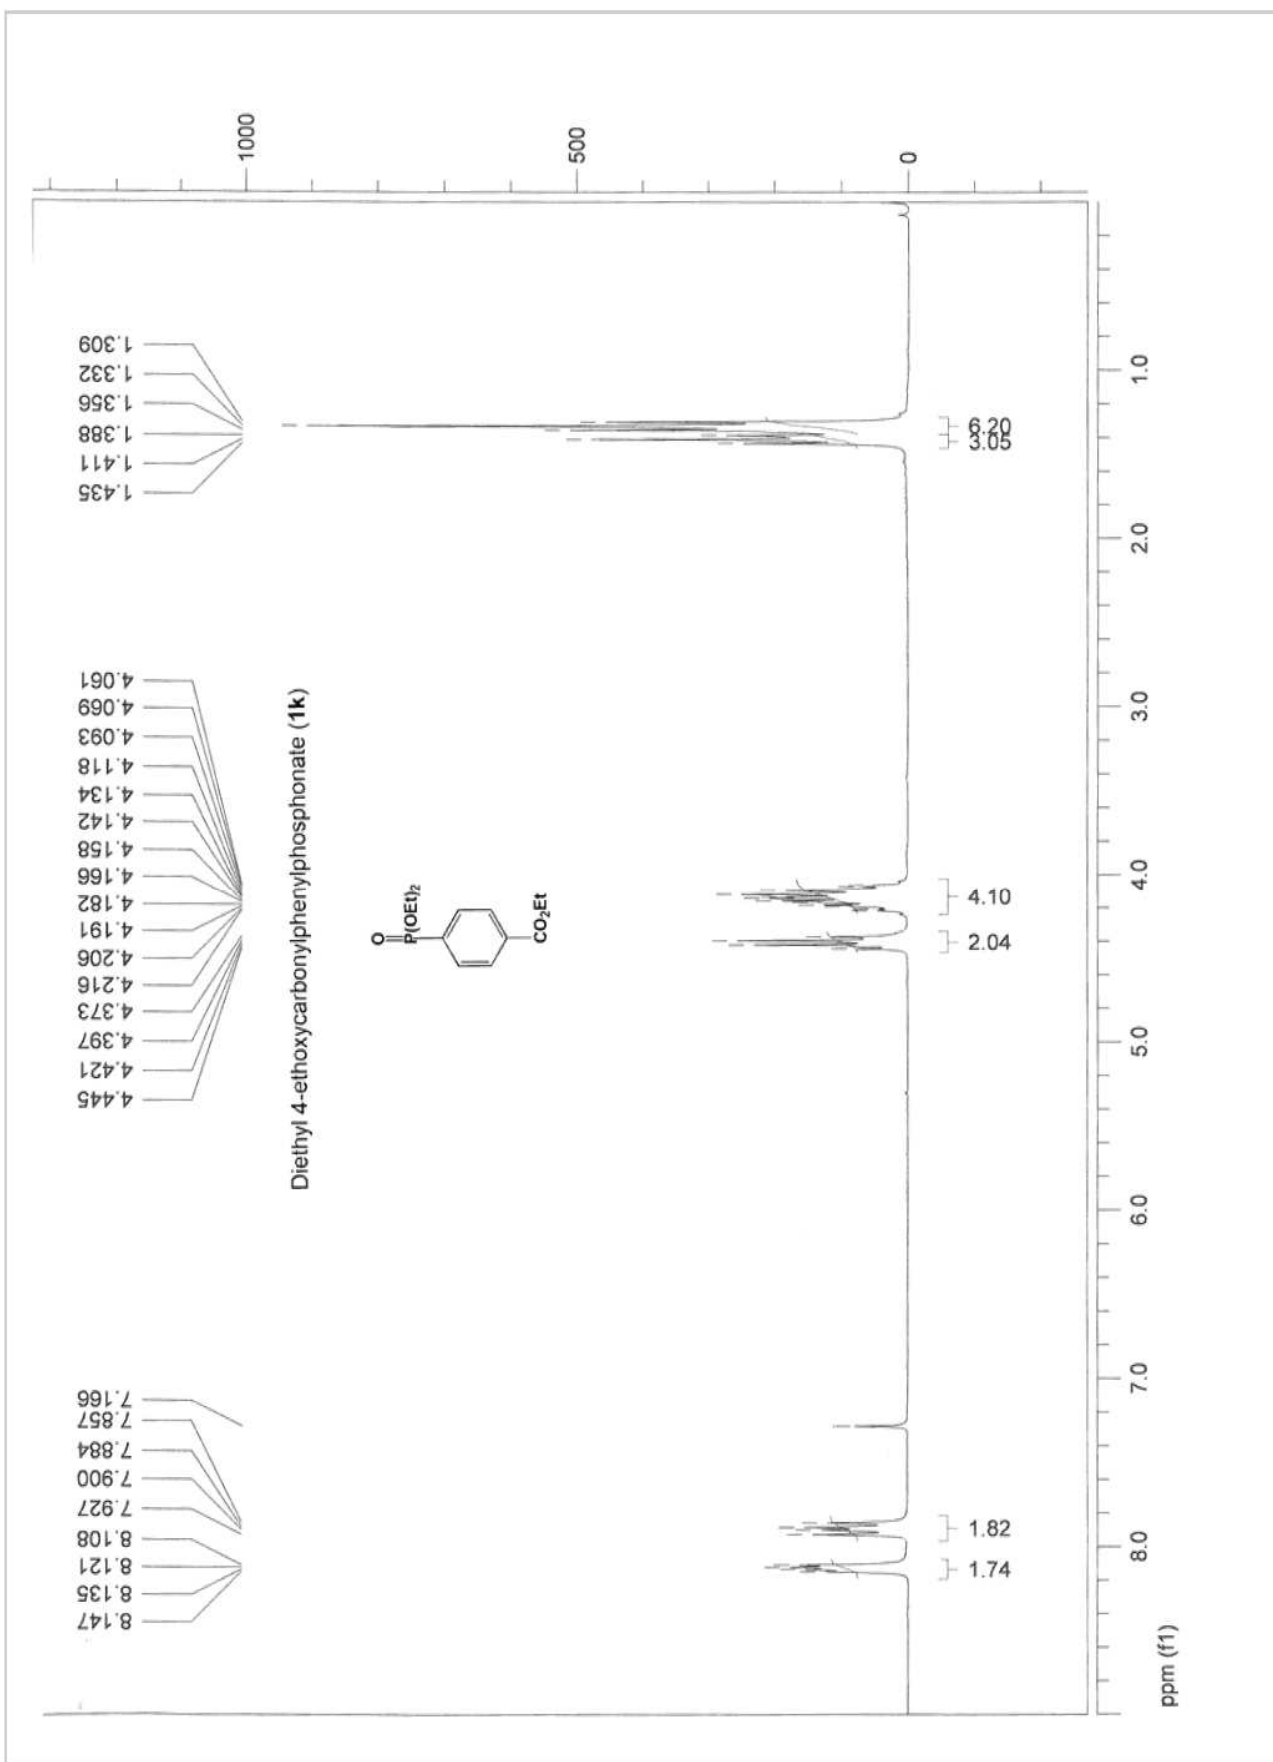

Diethyl 3-ethoxycarbonylphenylphosphonate (**11**)

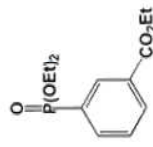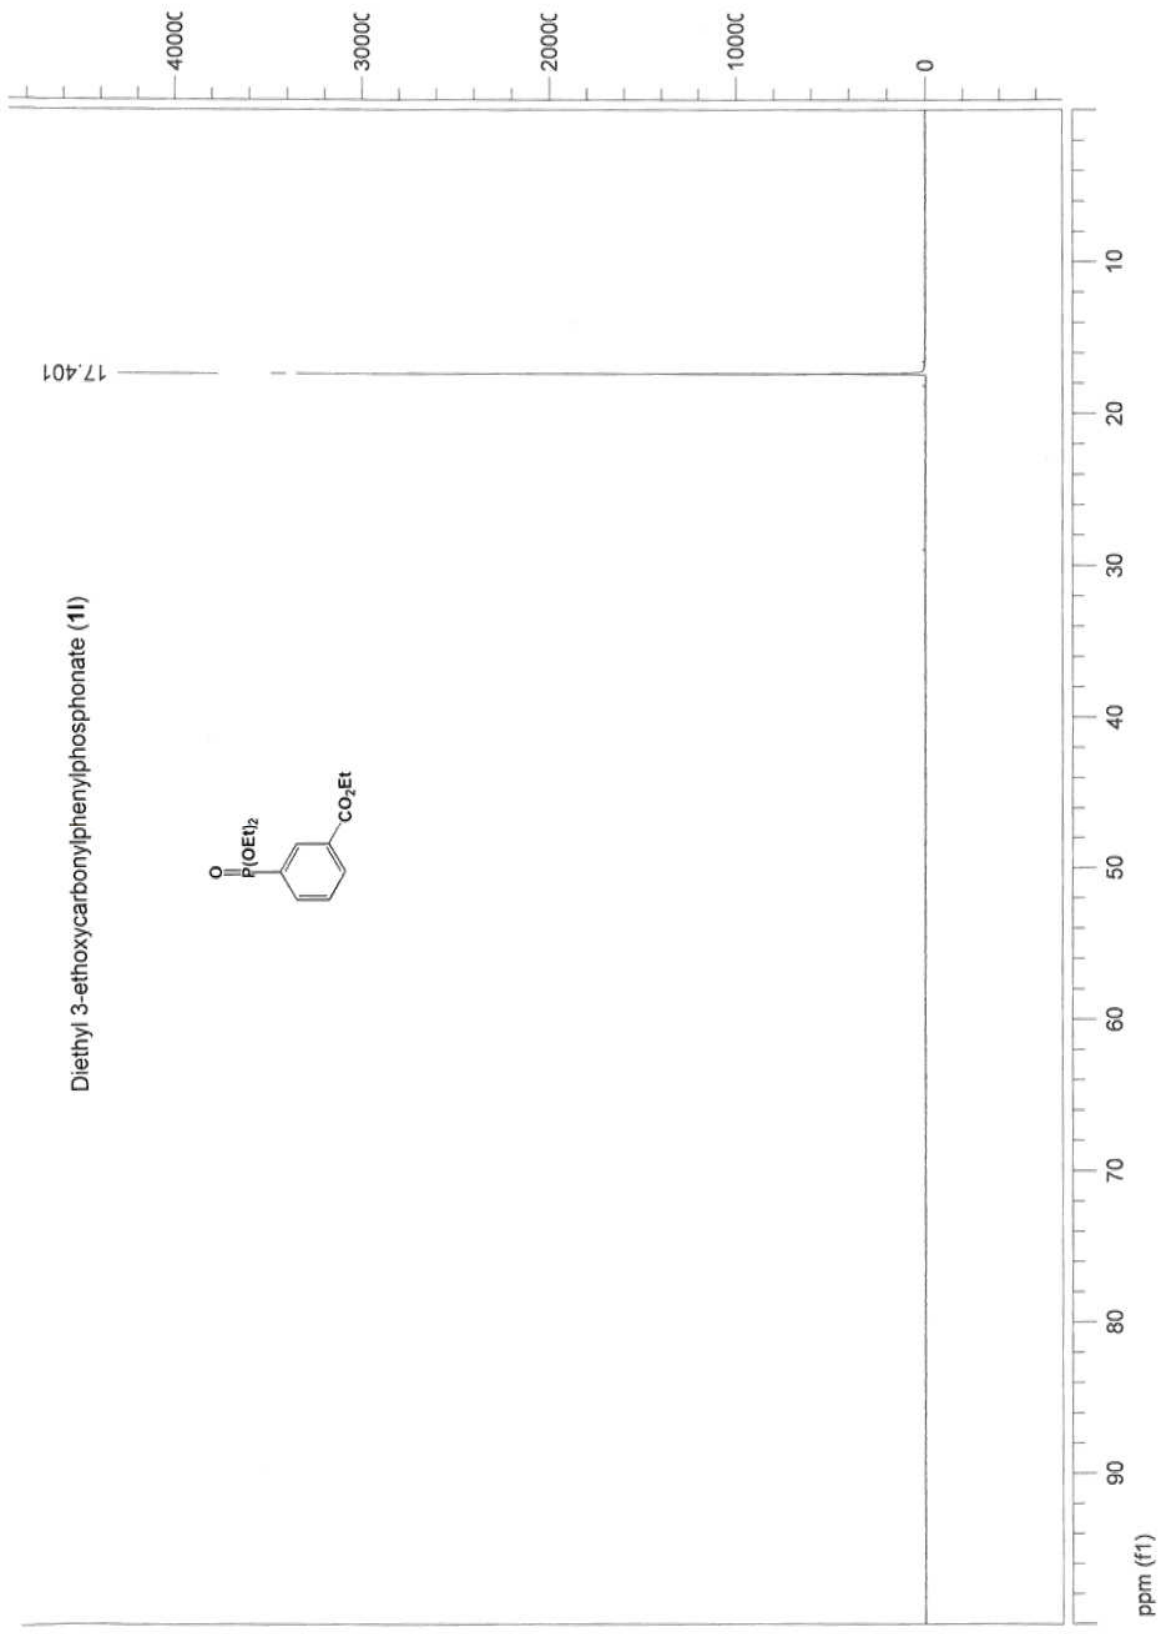

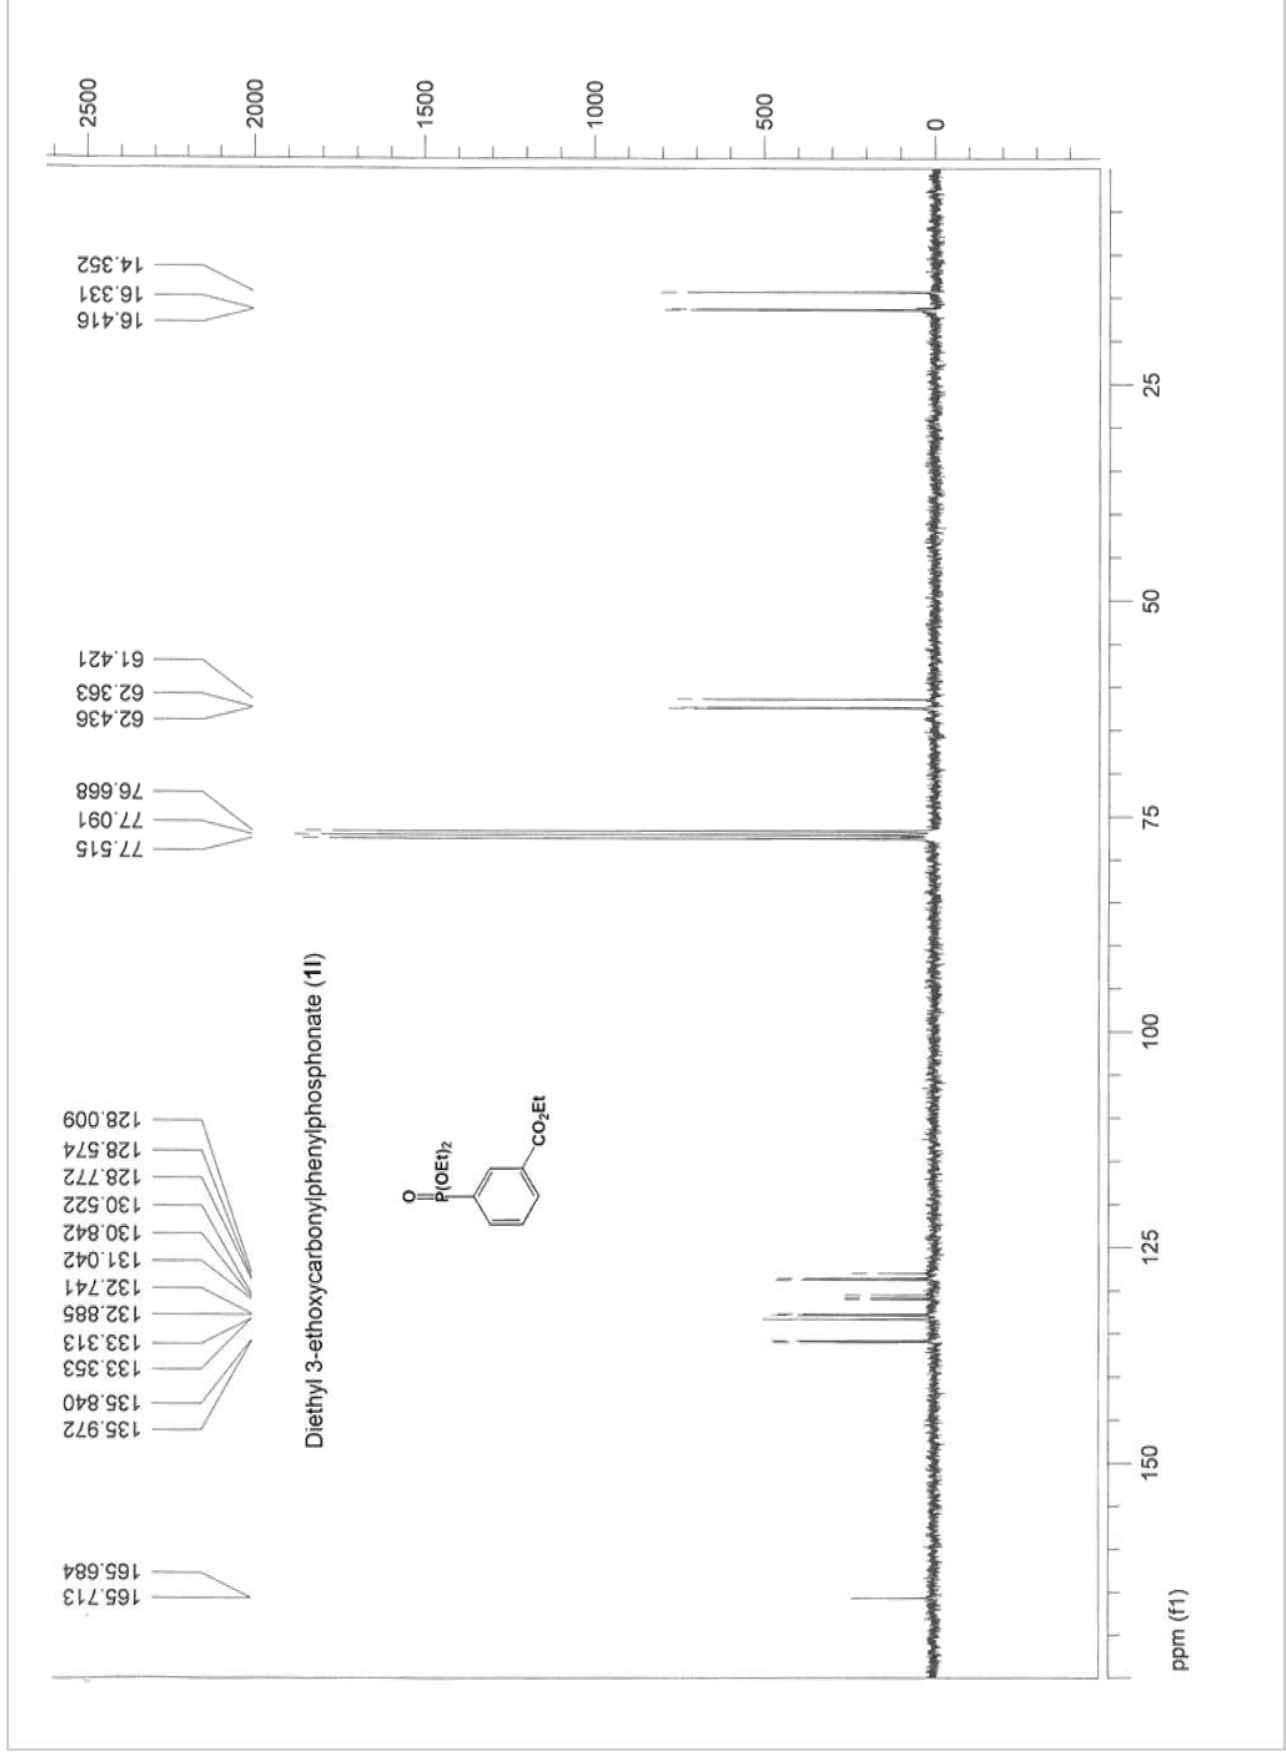

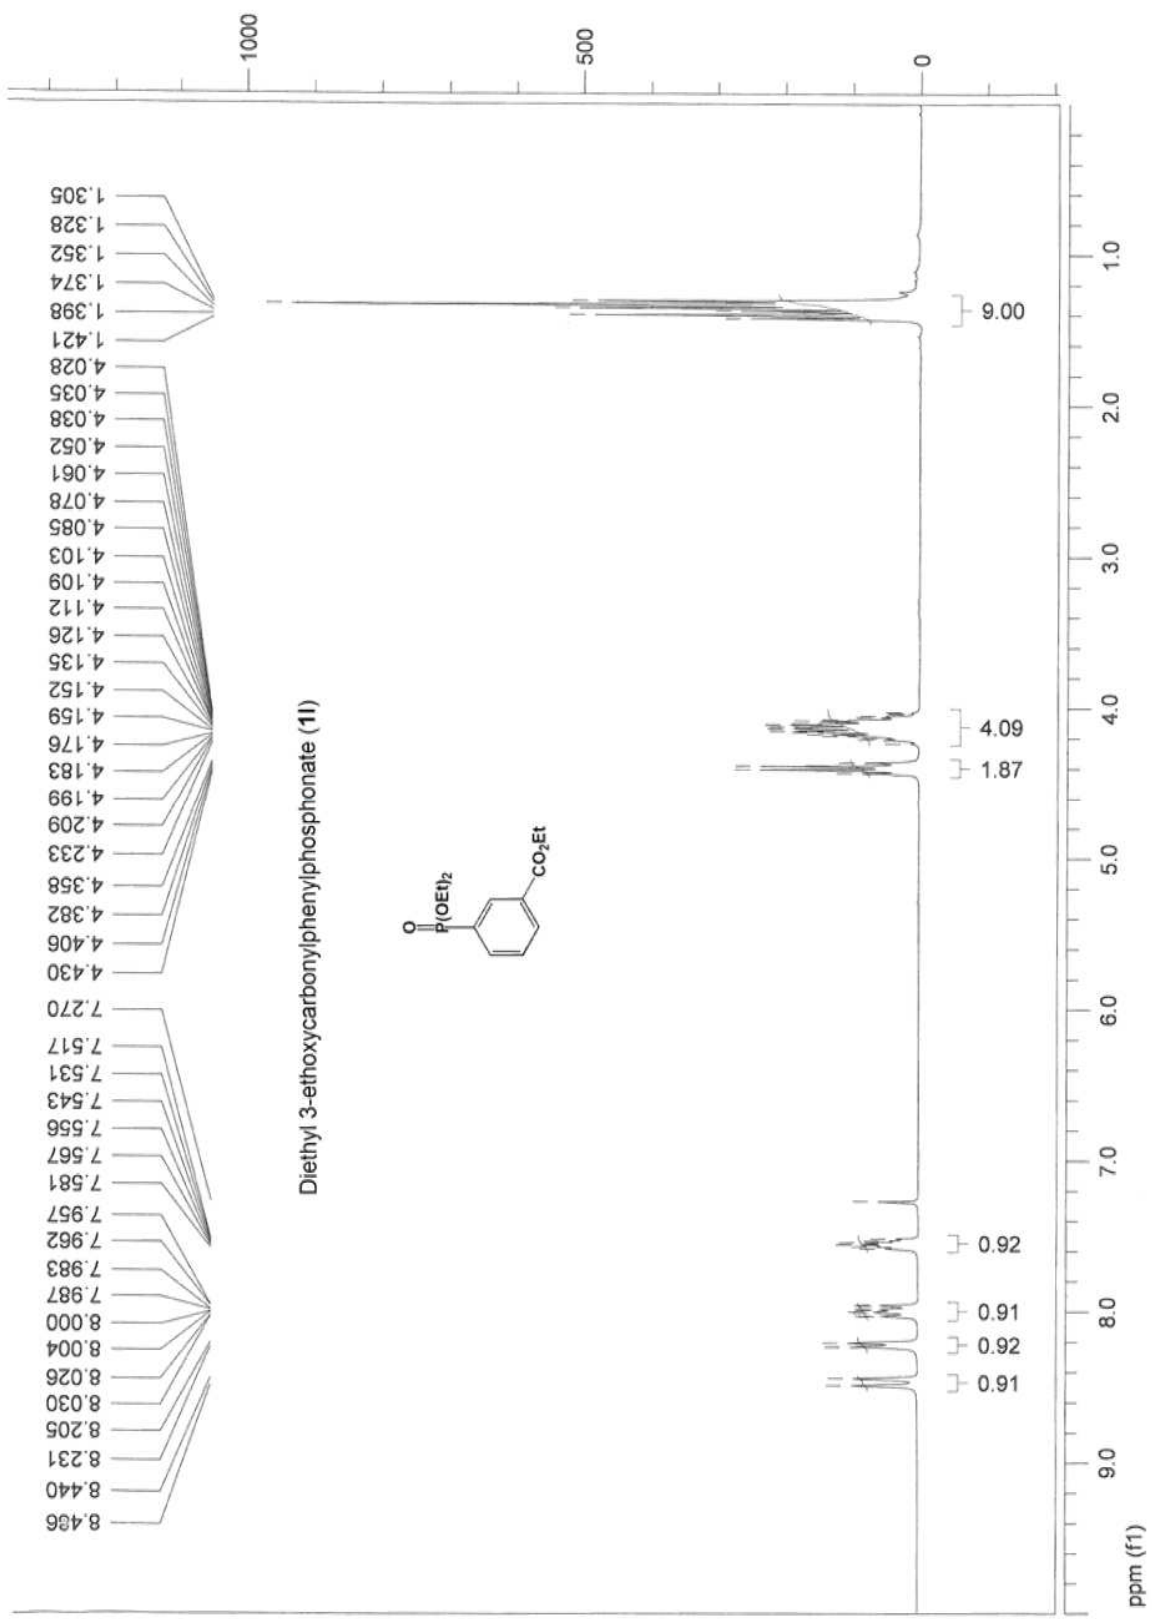

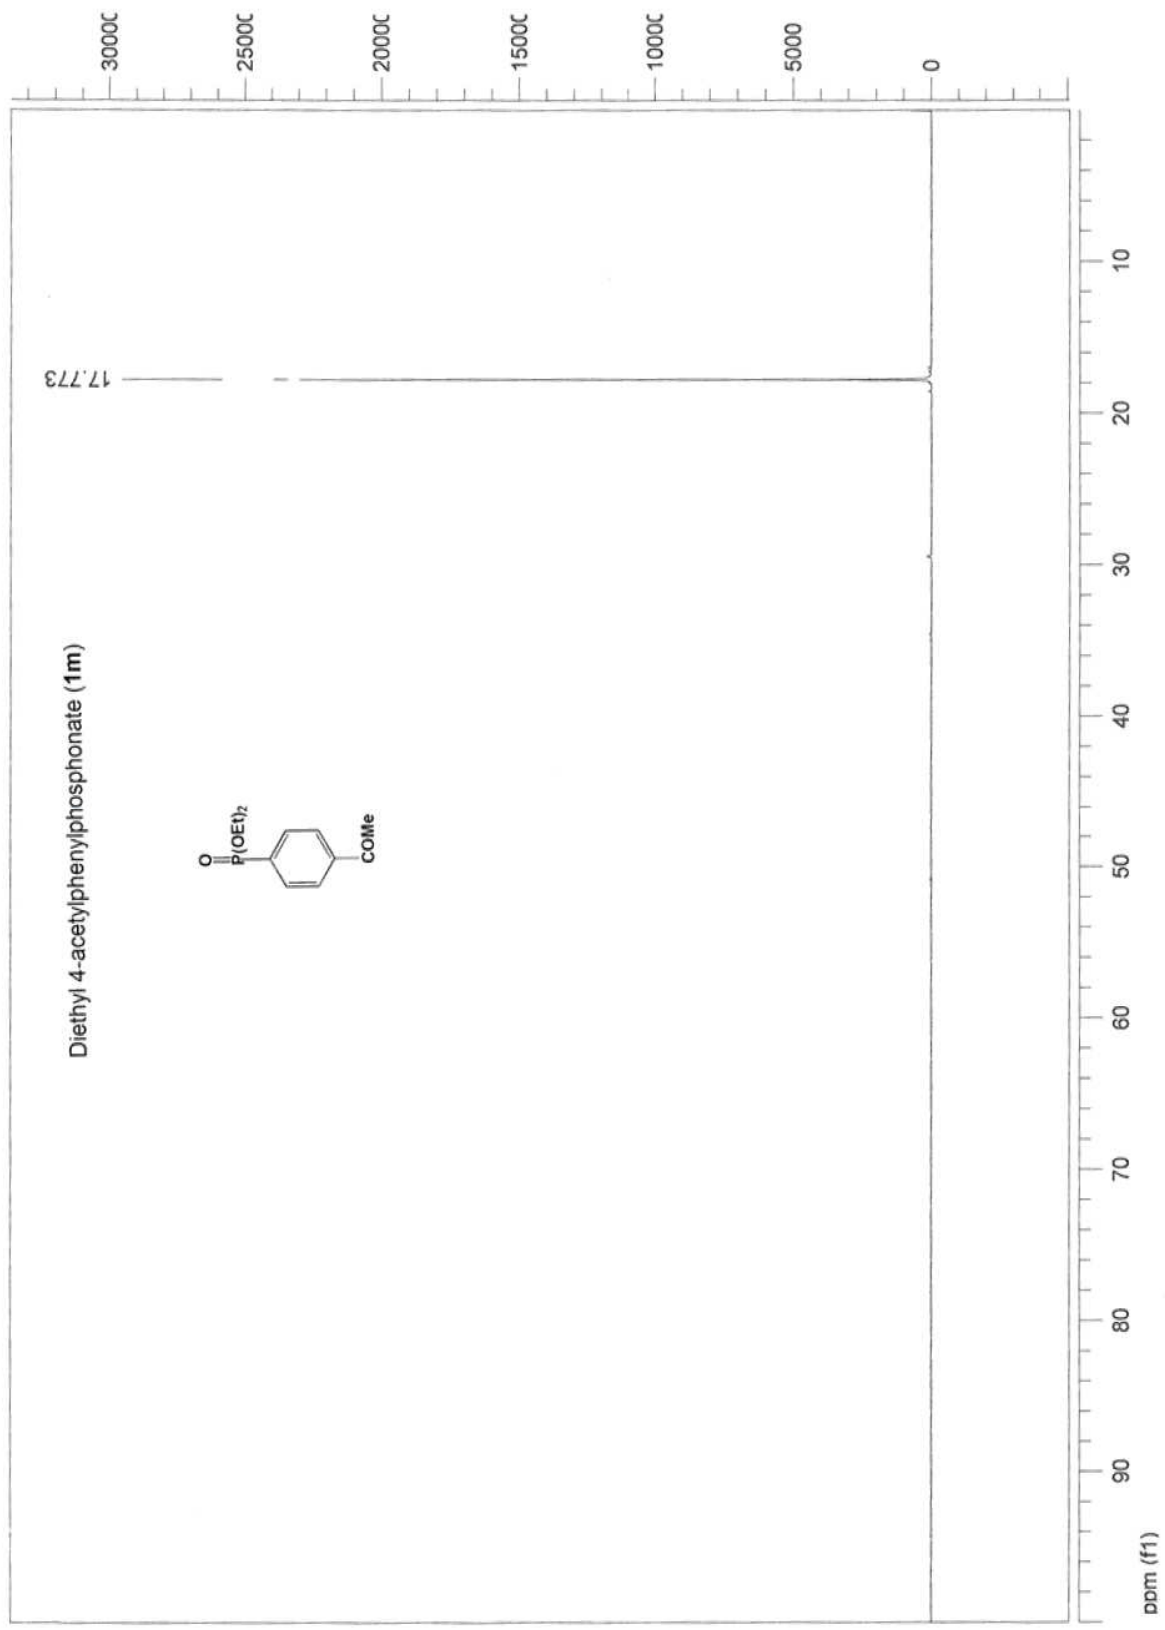

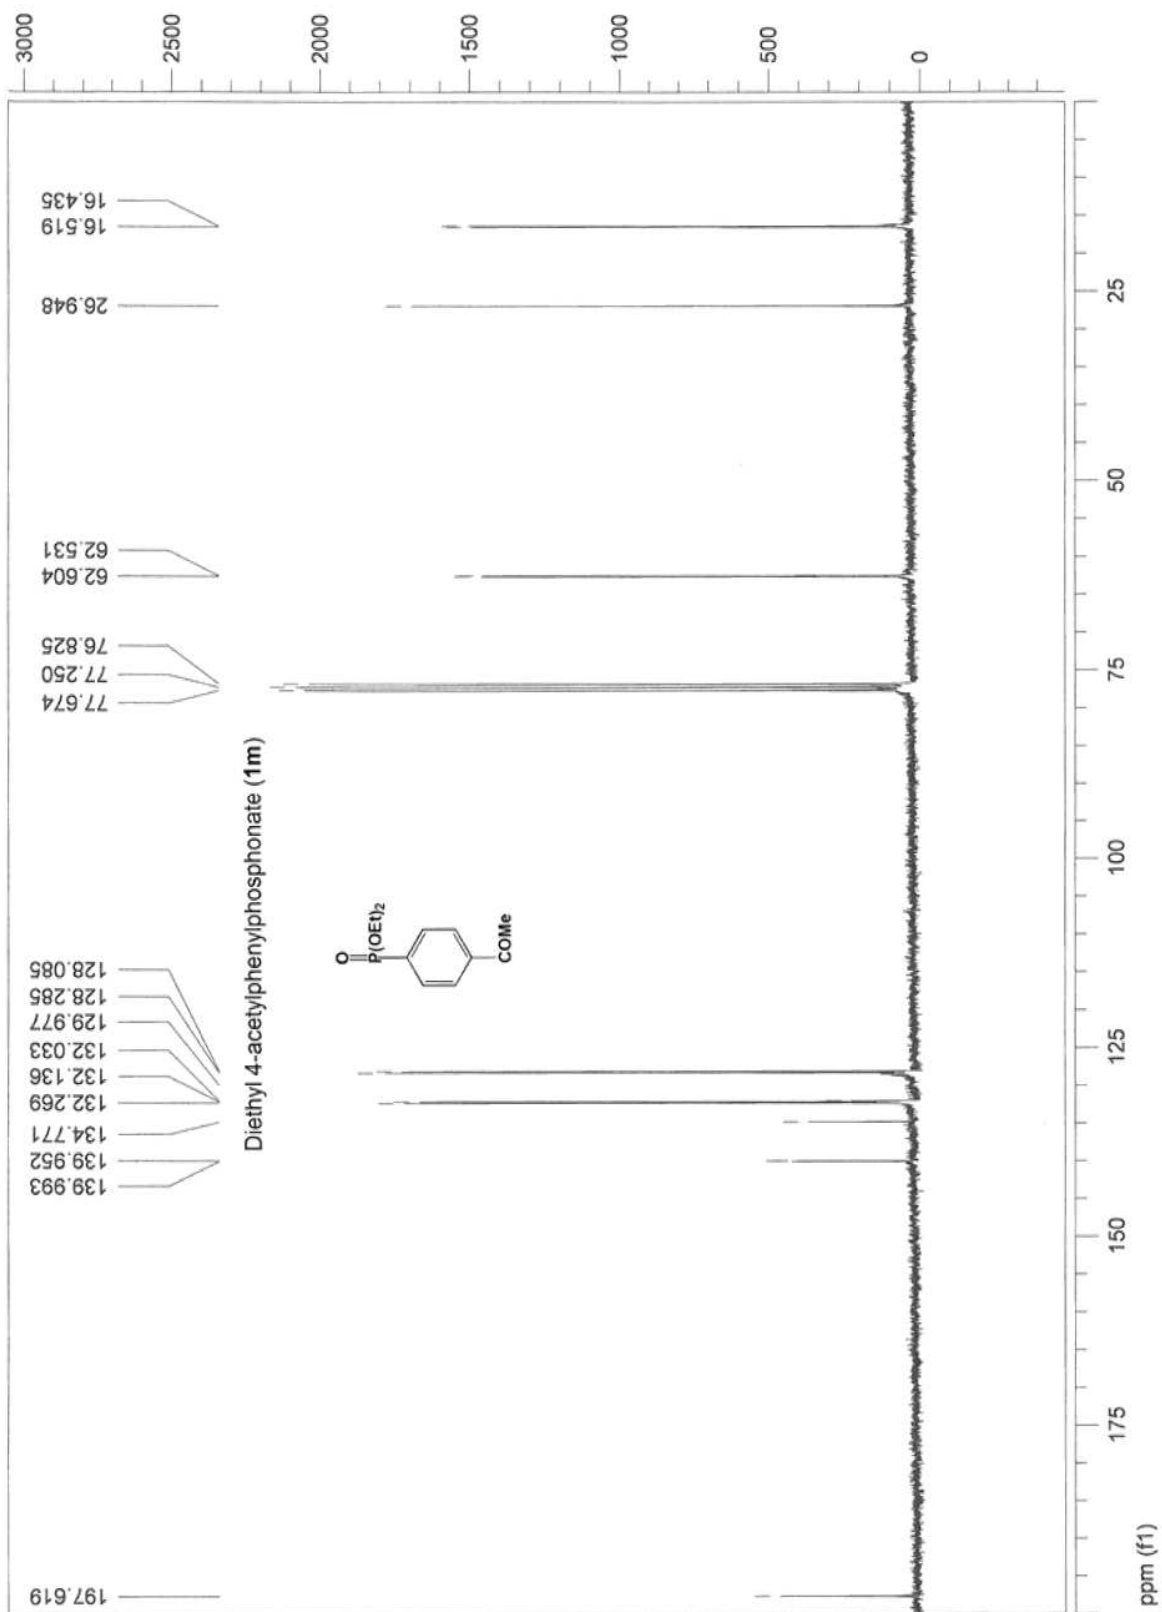

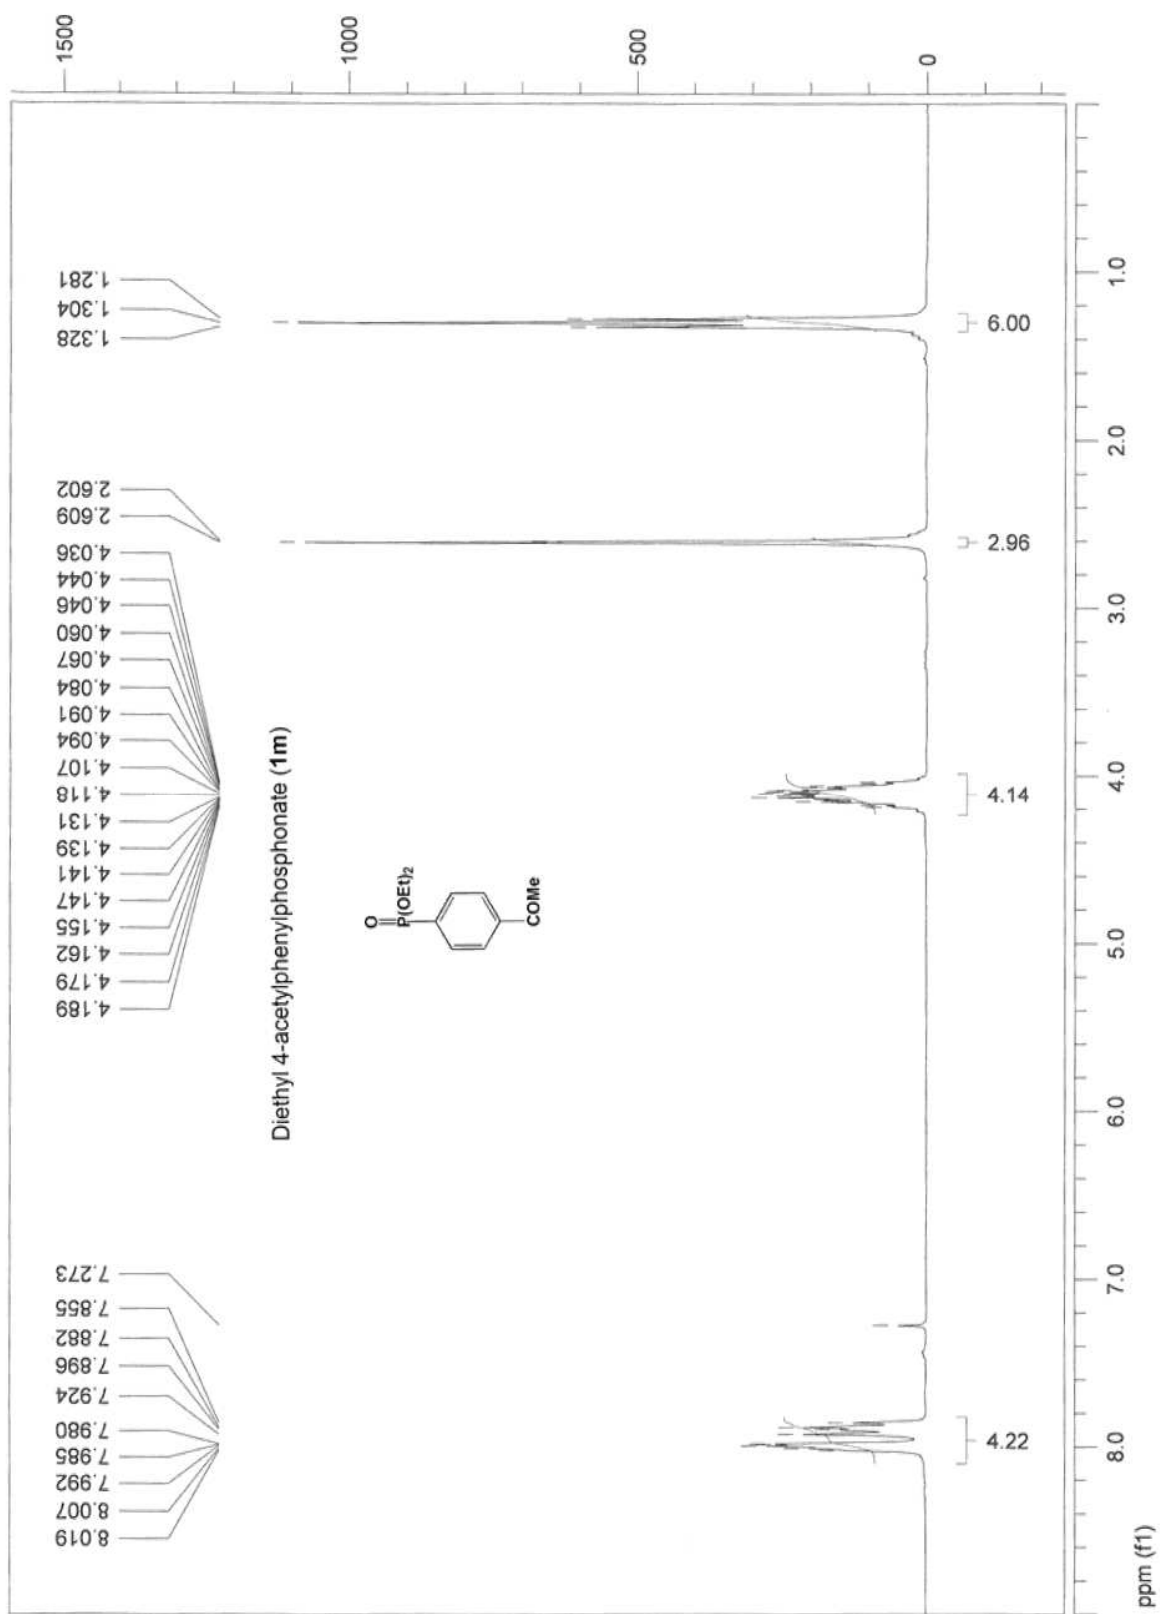



Diethyl 3-acetylphenylphosphonate (**1n**)

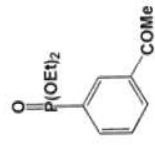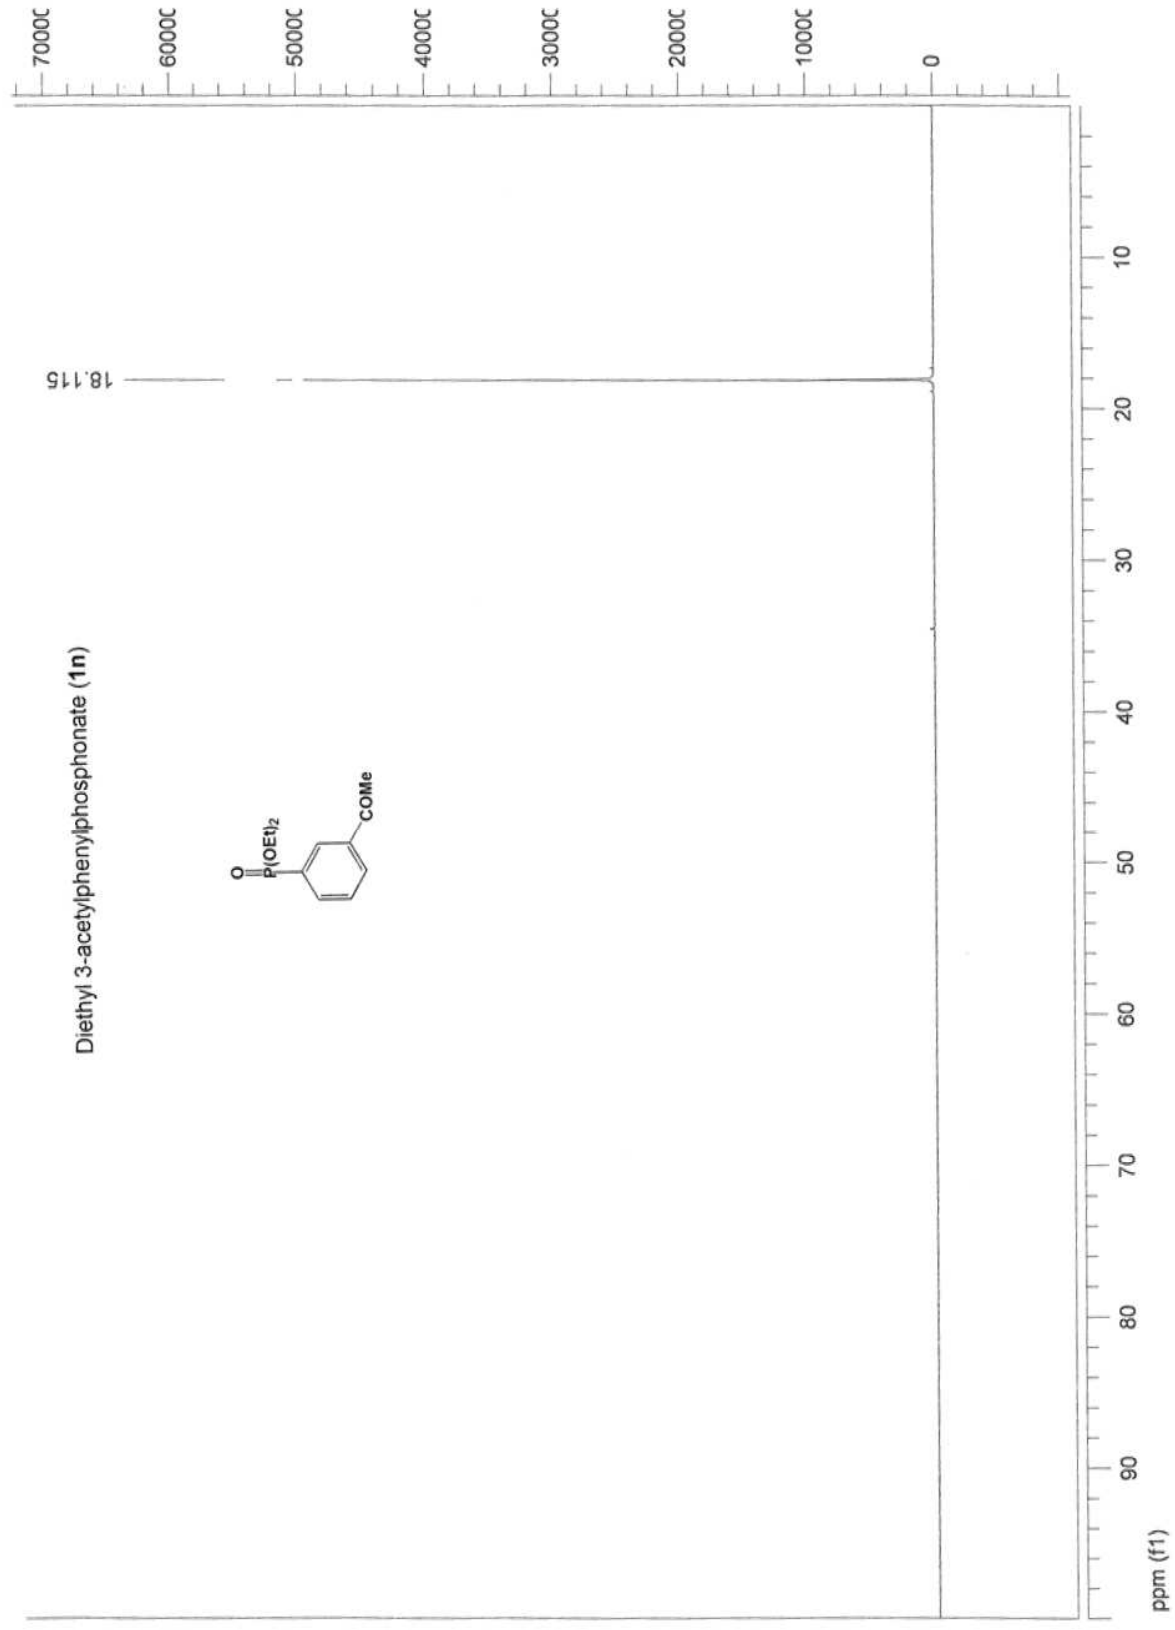

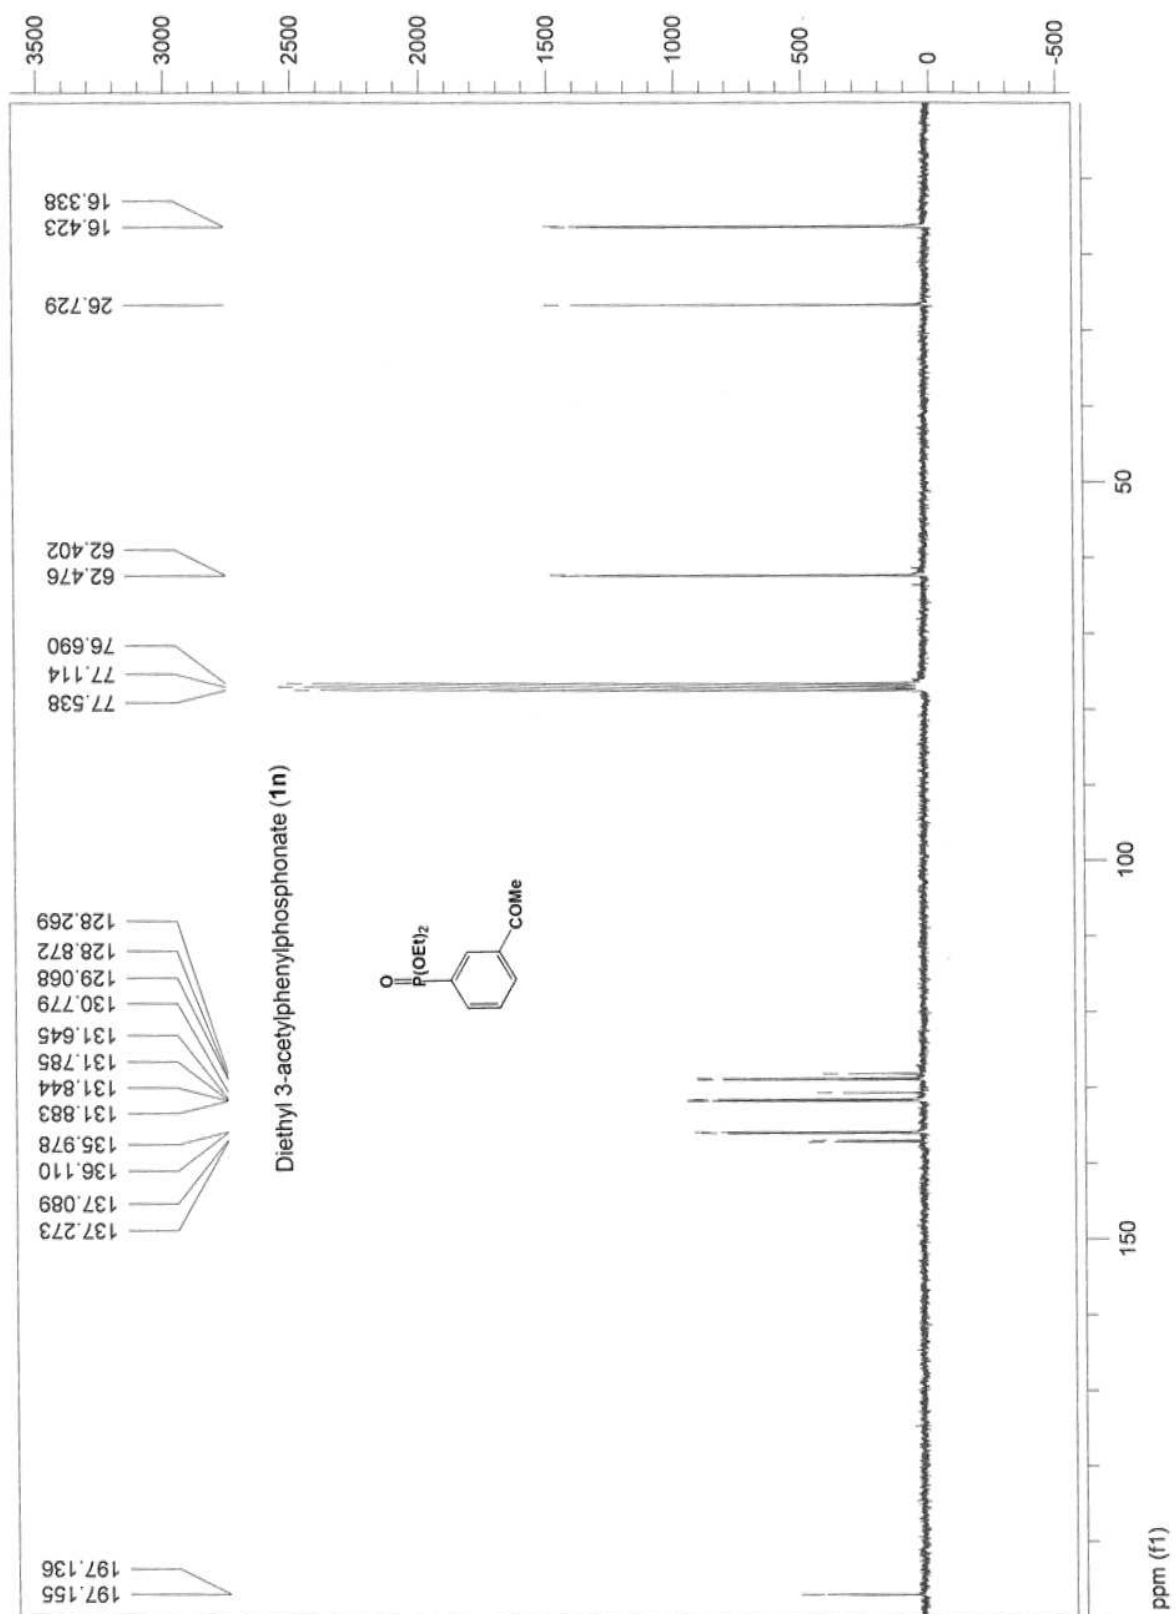

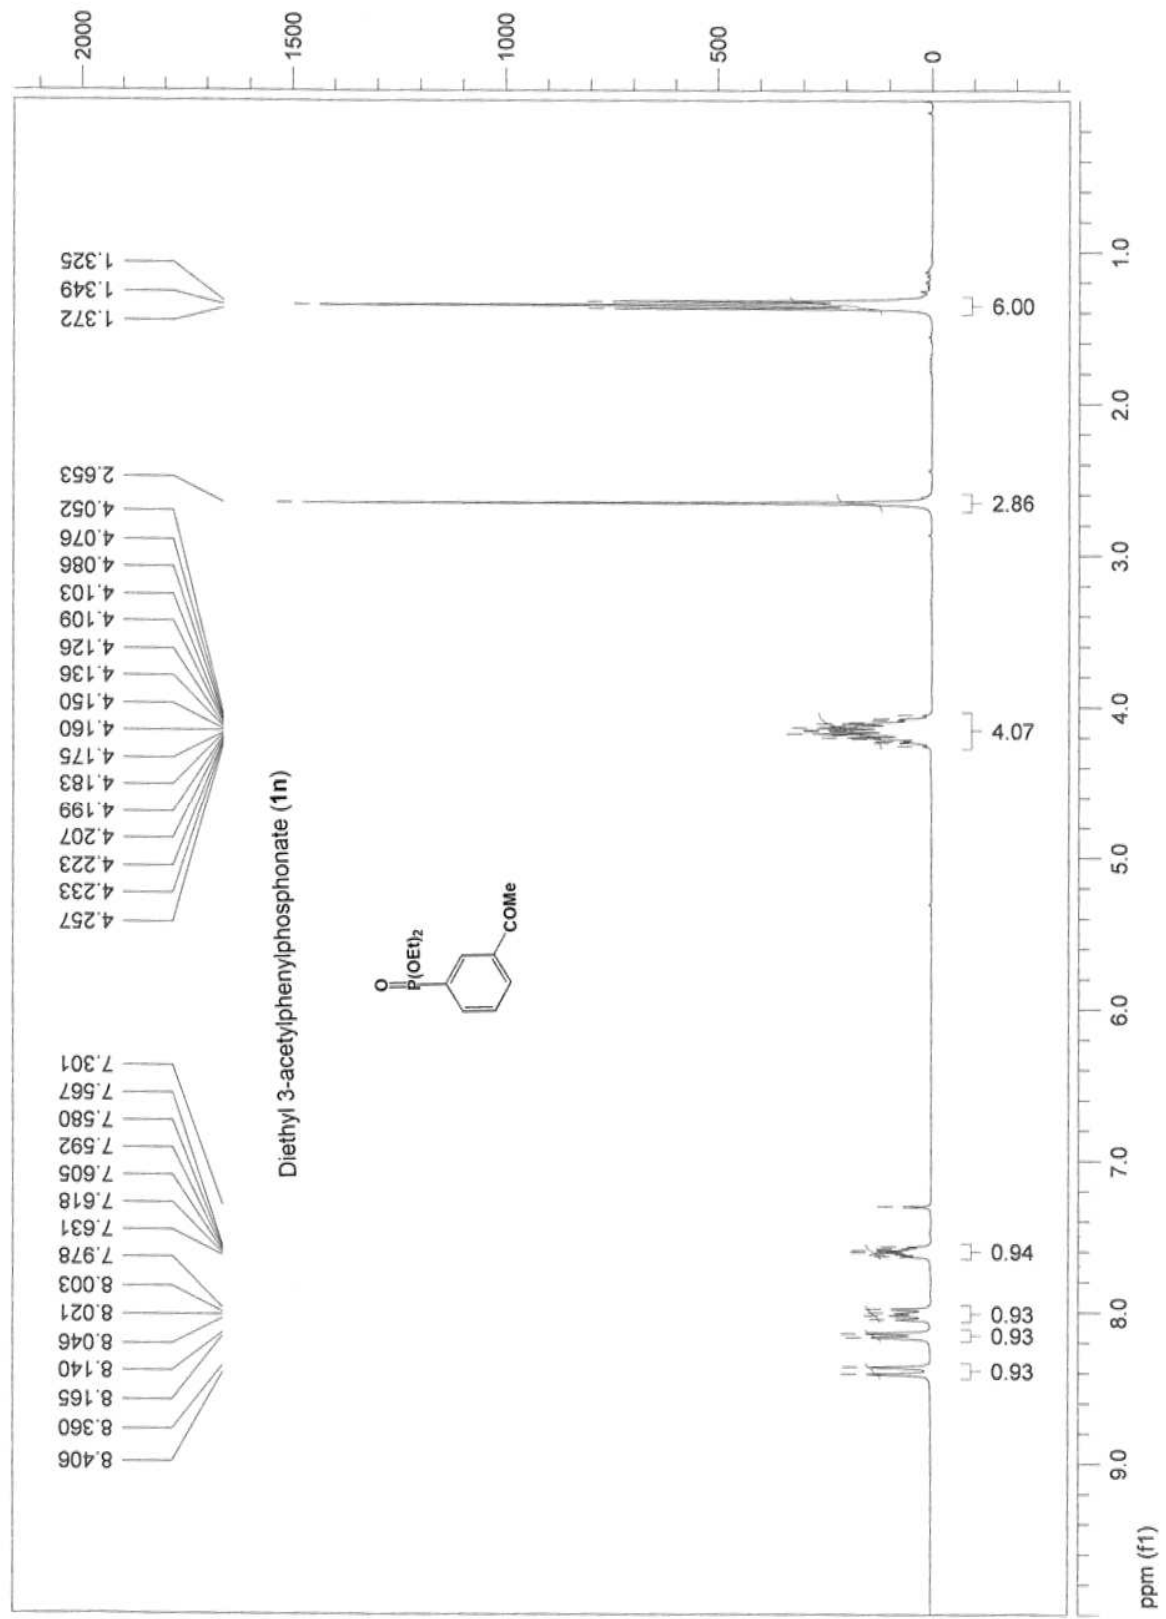

Isopentyl phenylphosphinate (2f)

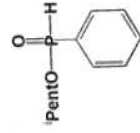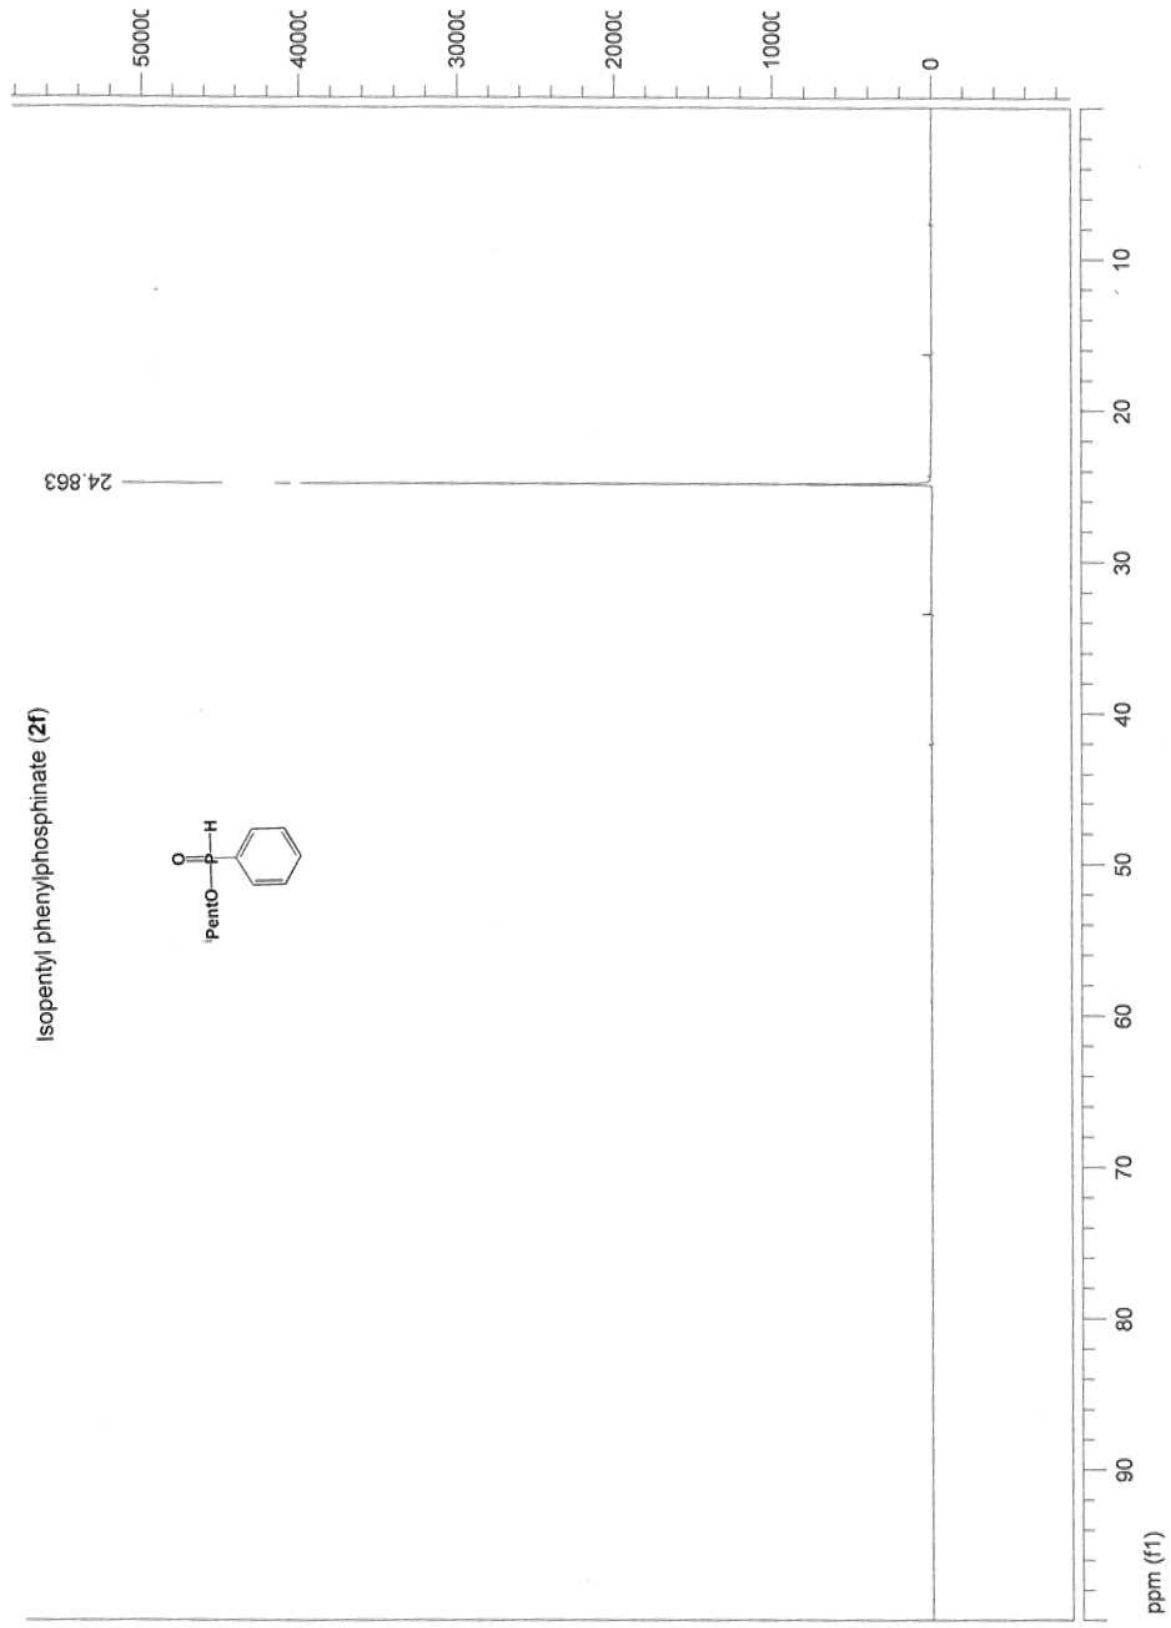

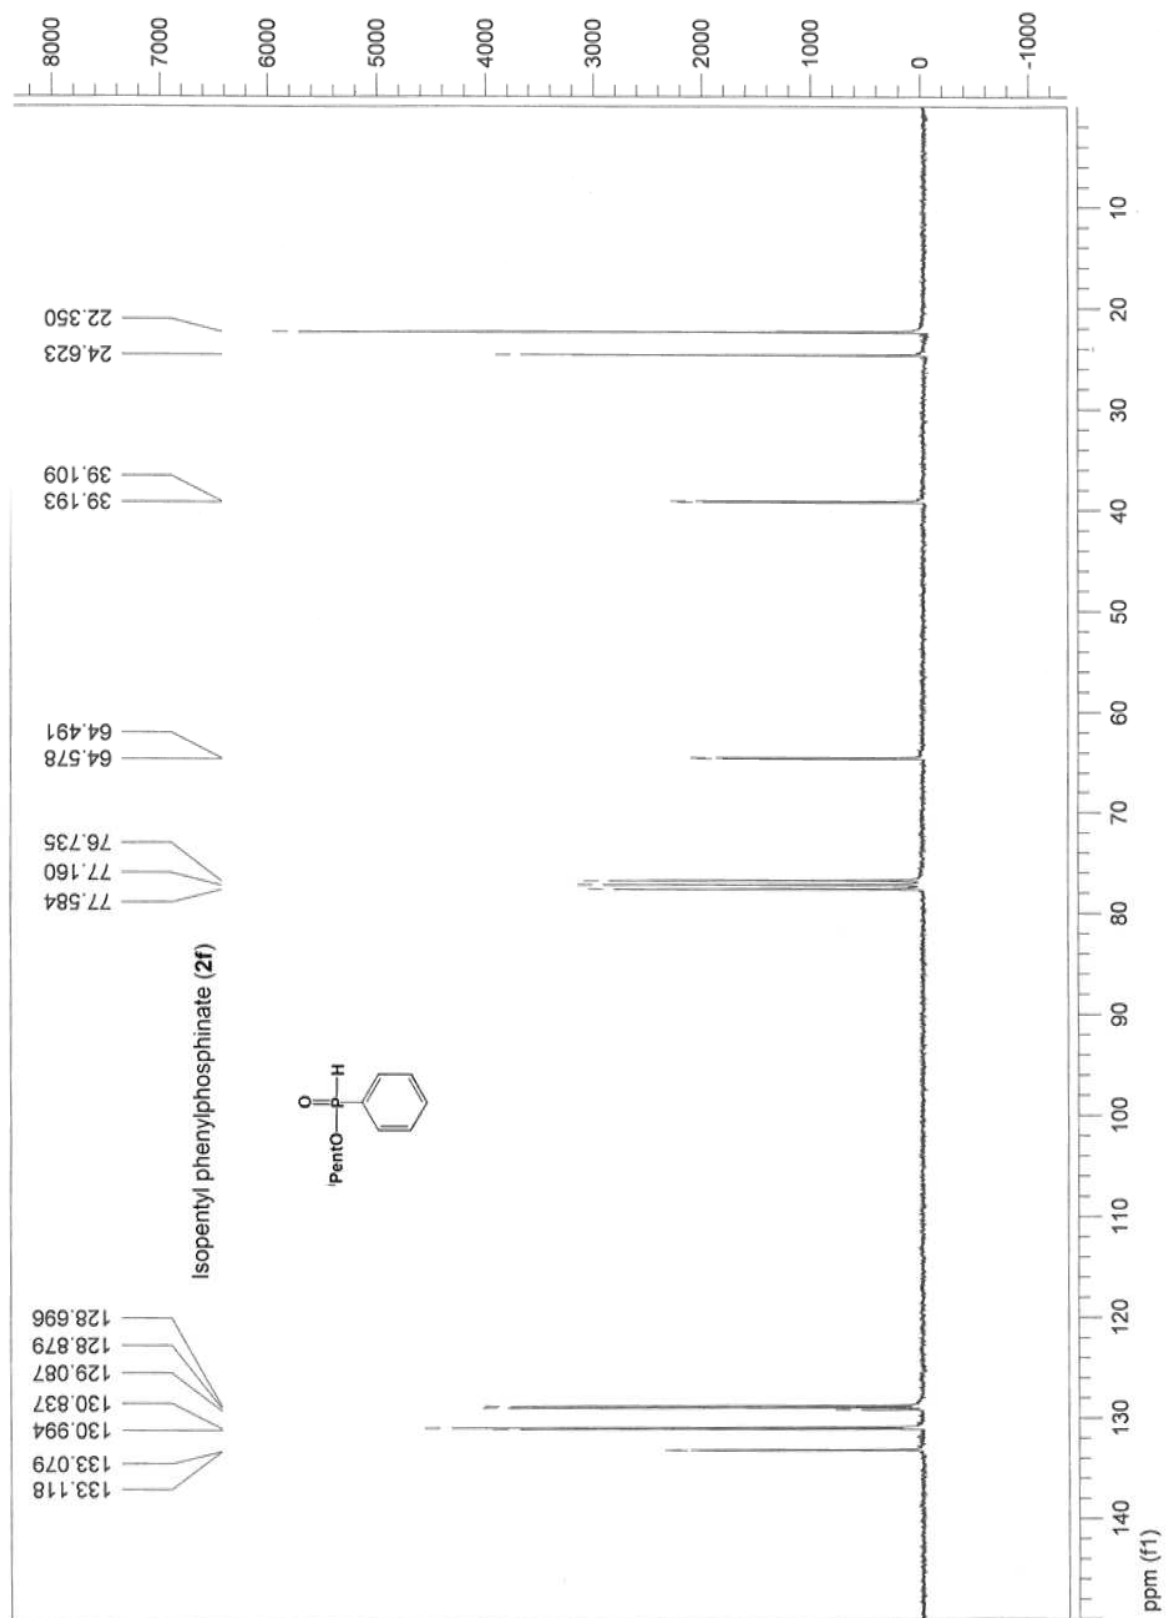

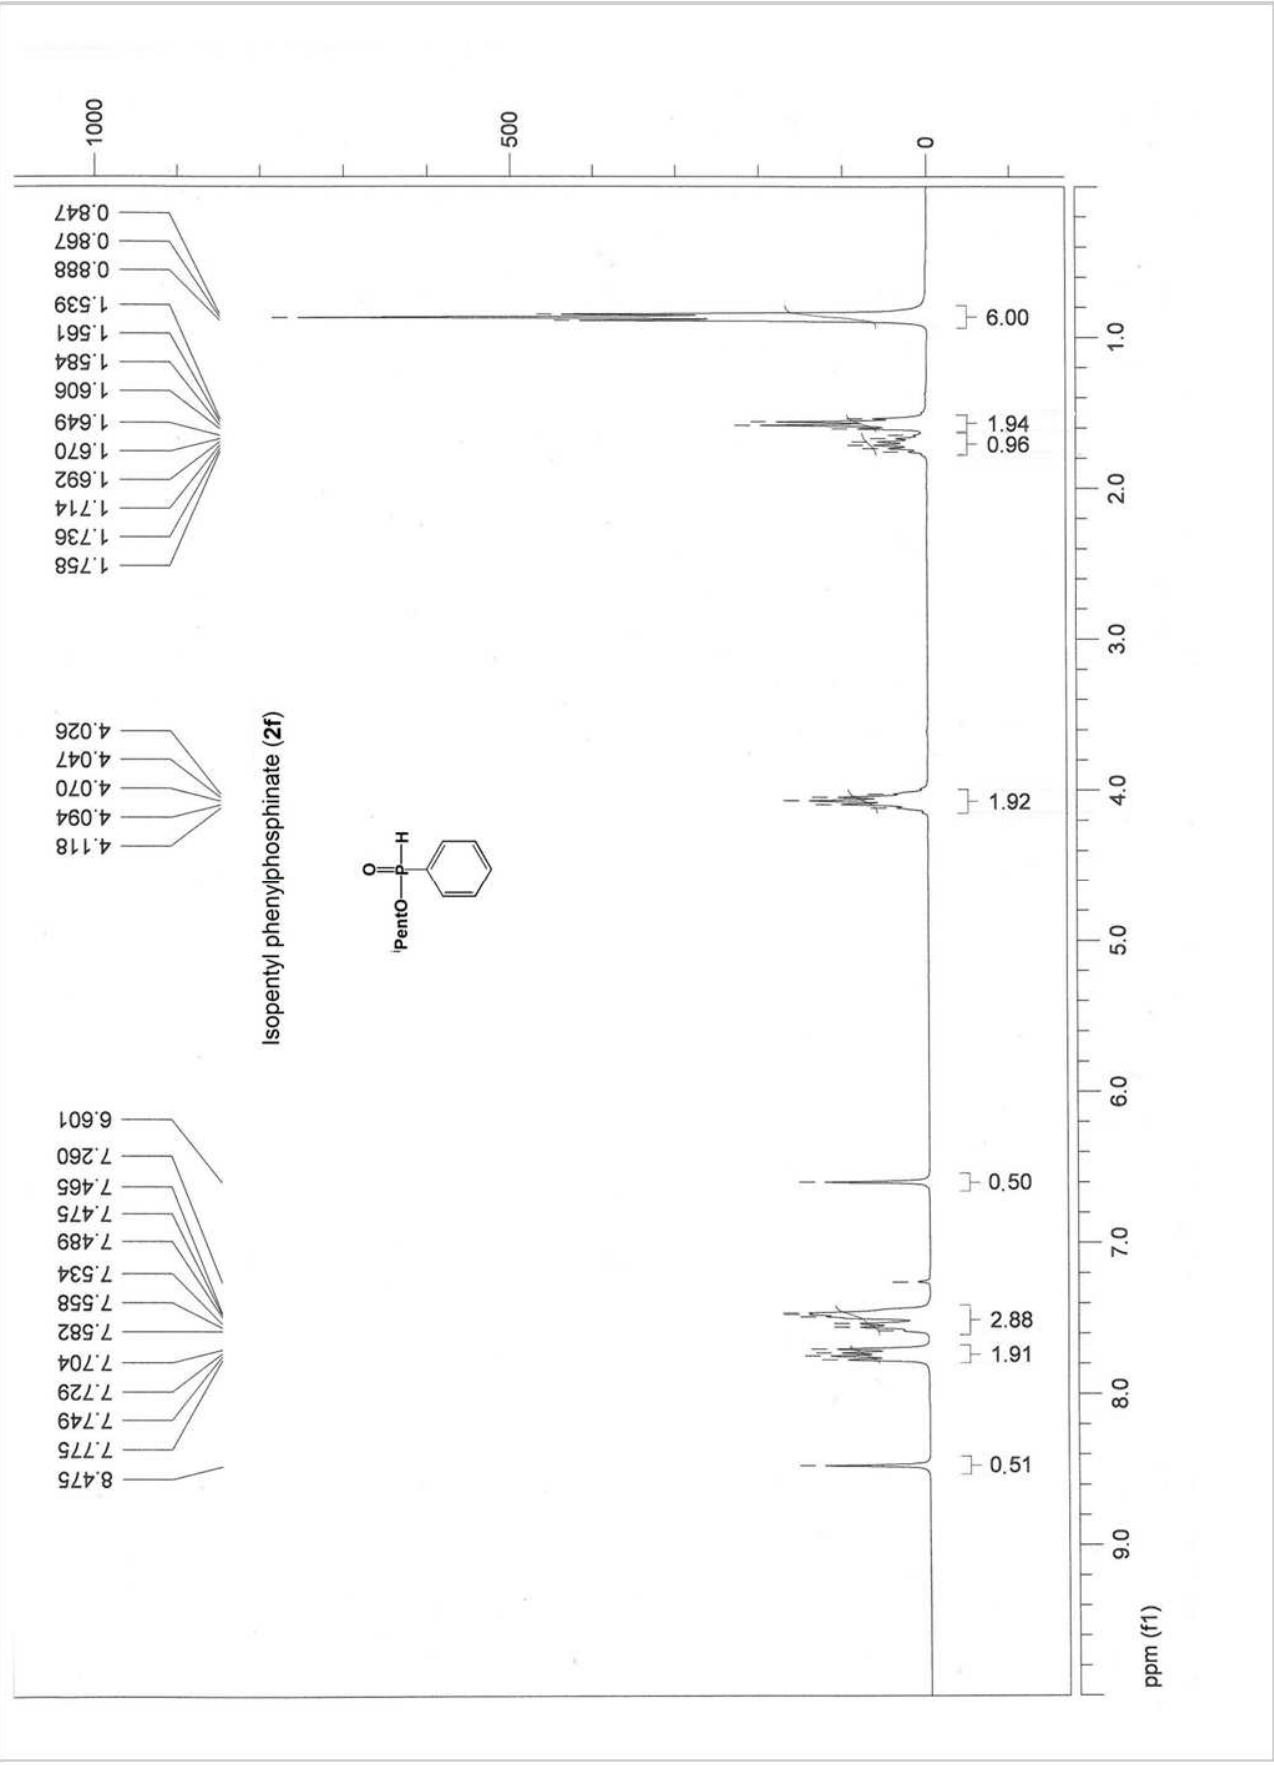

Ethyl diphenylphosphinate (3a)

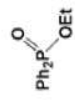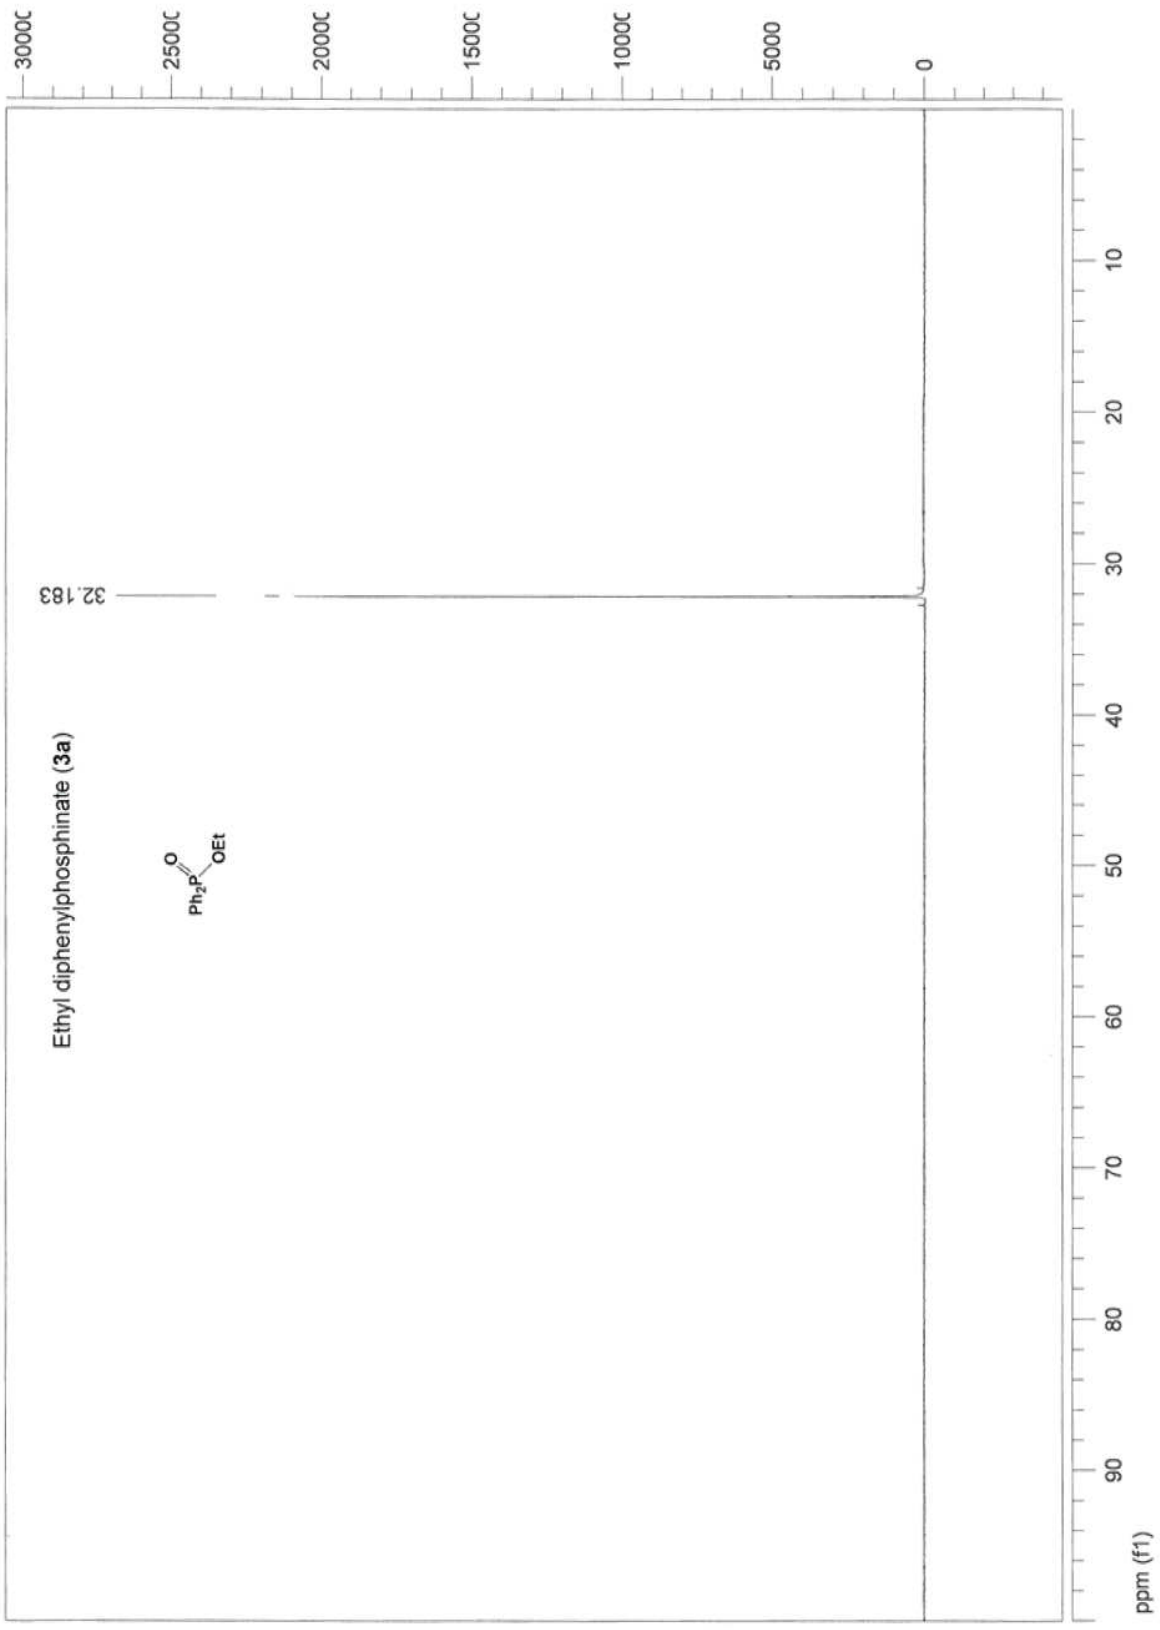

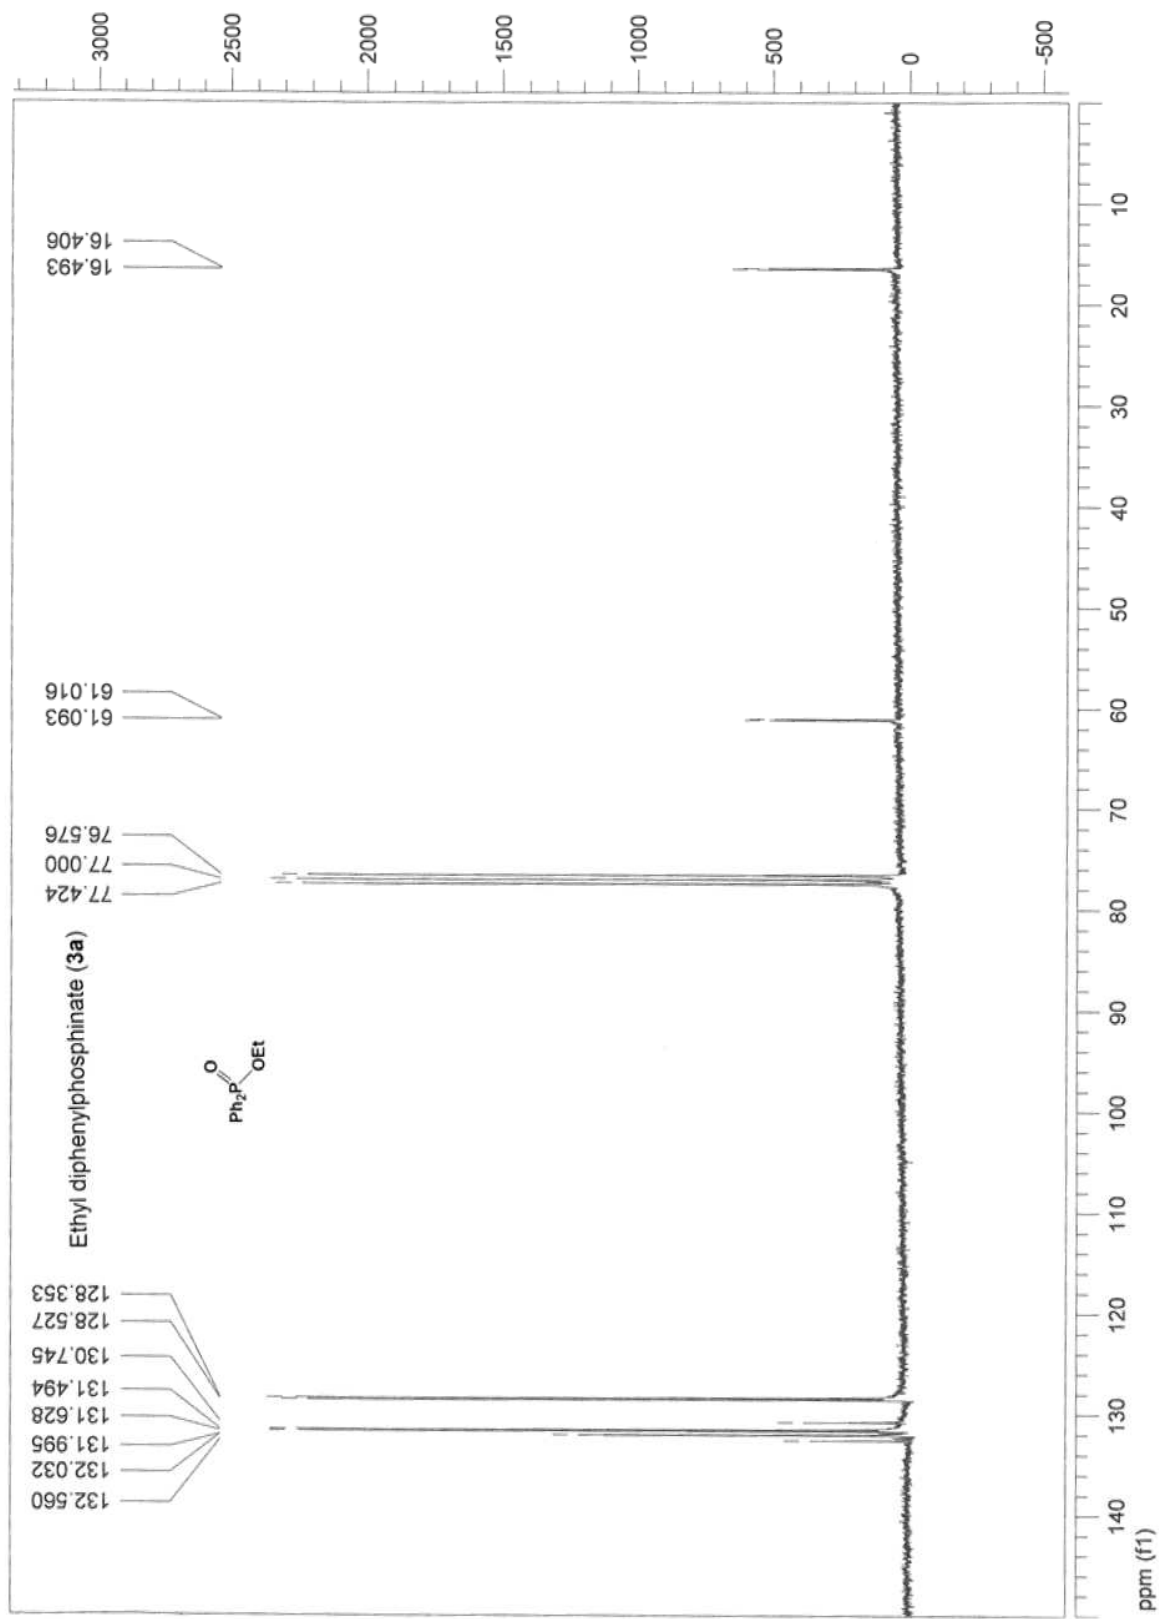



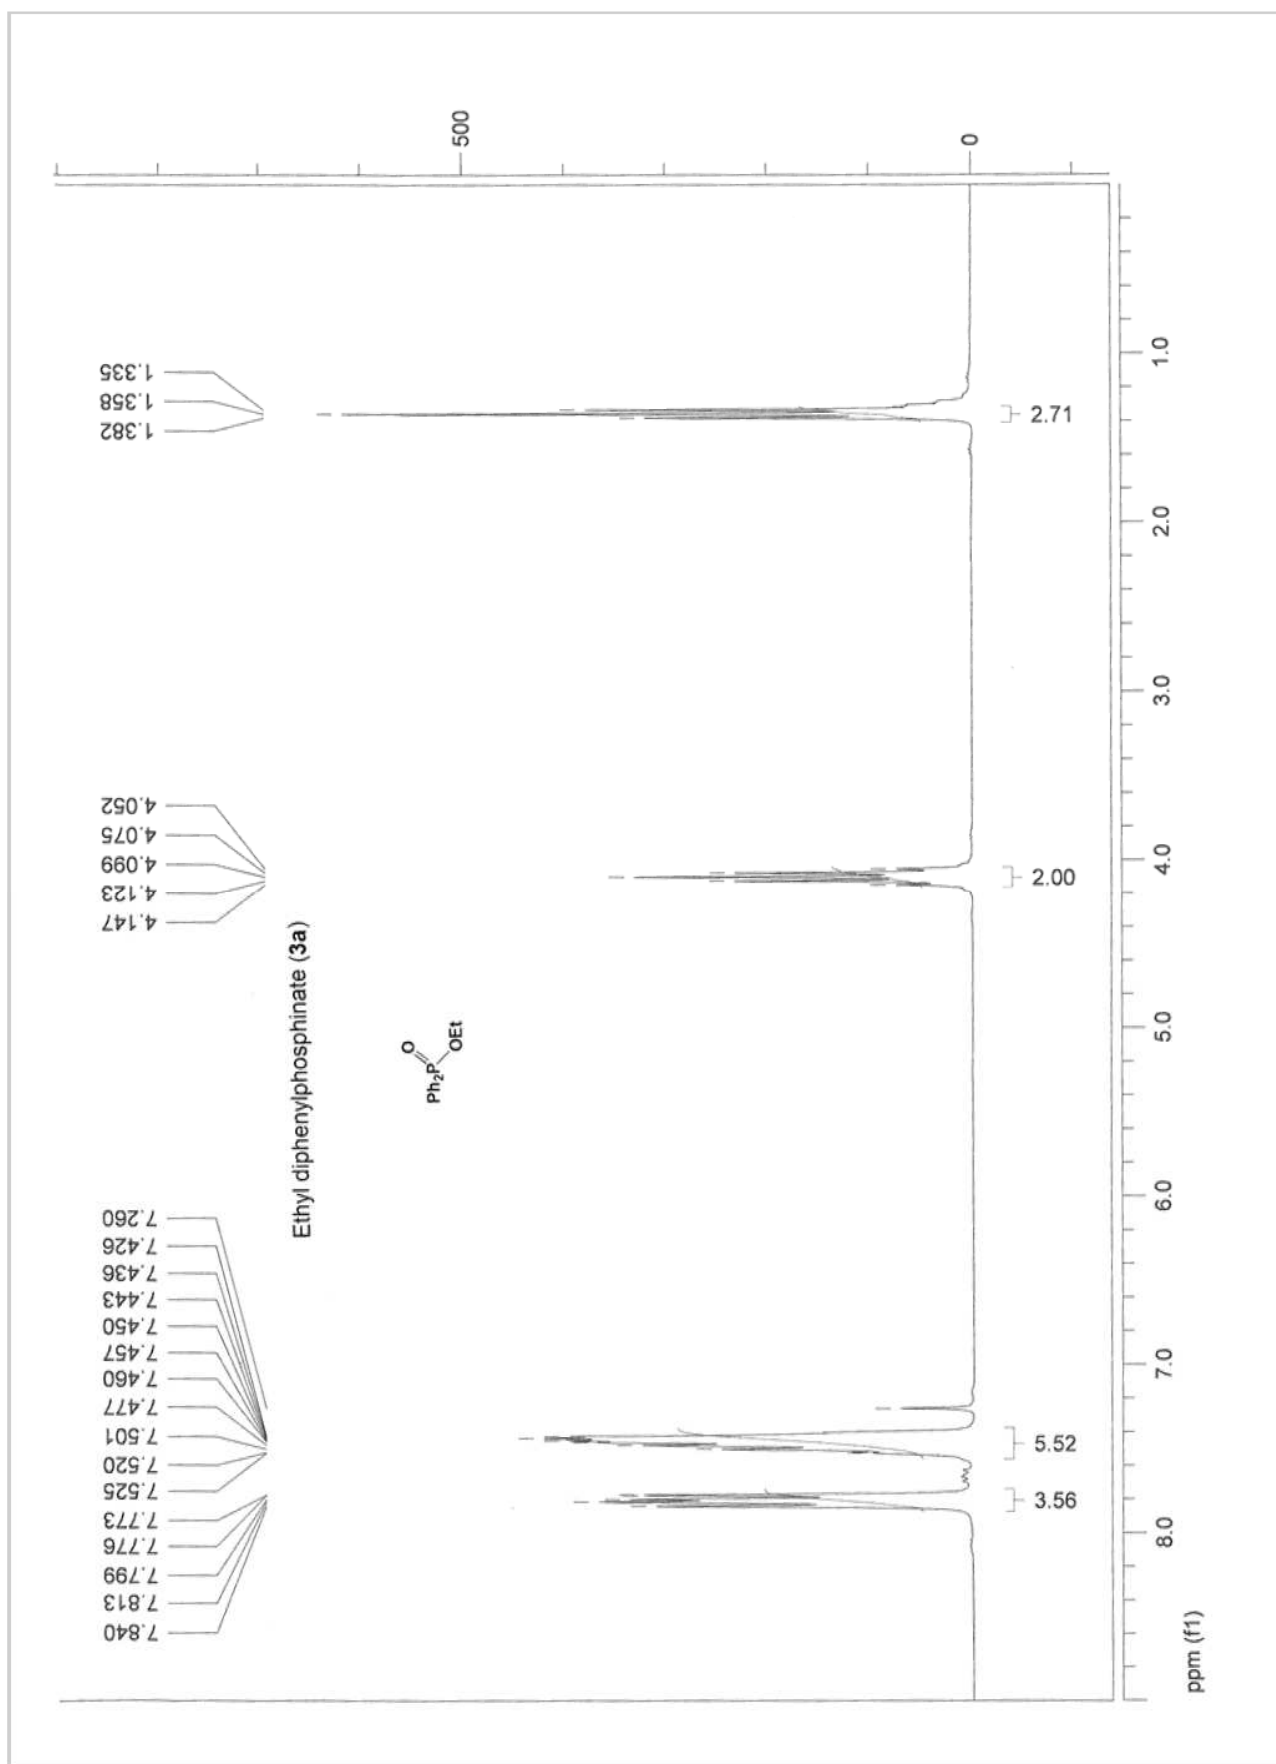

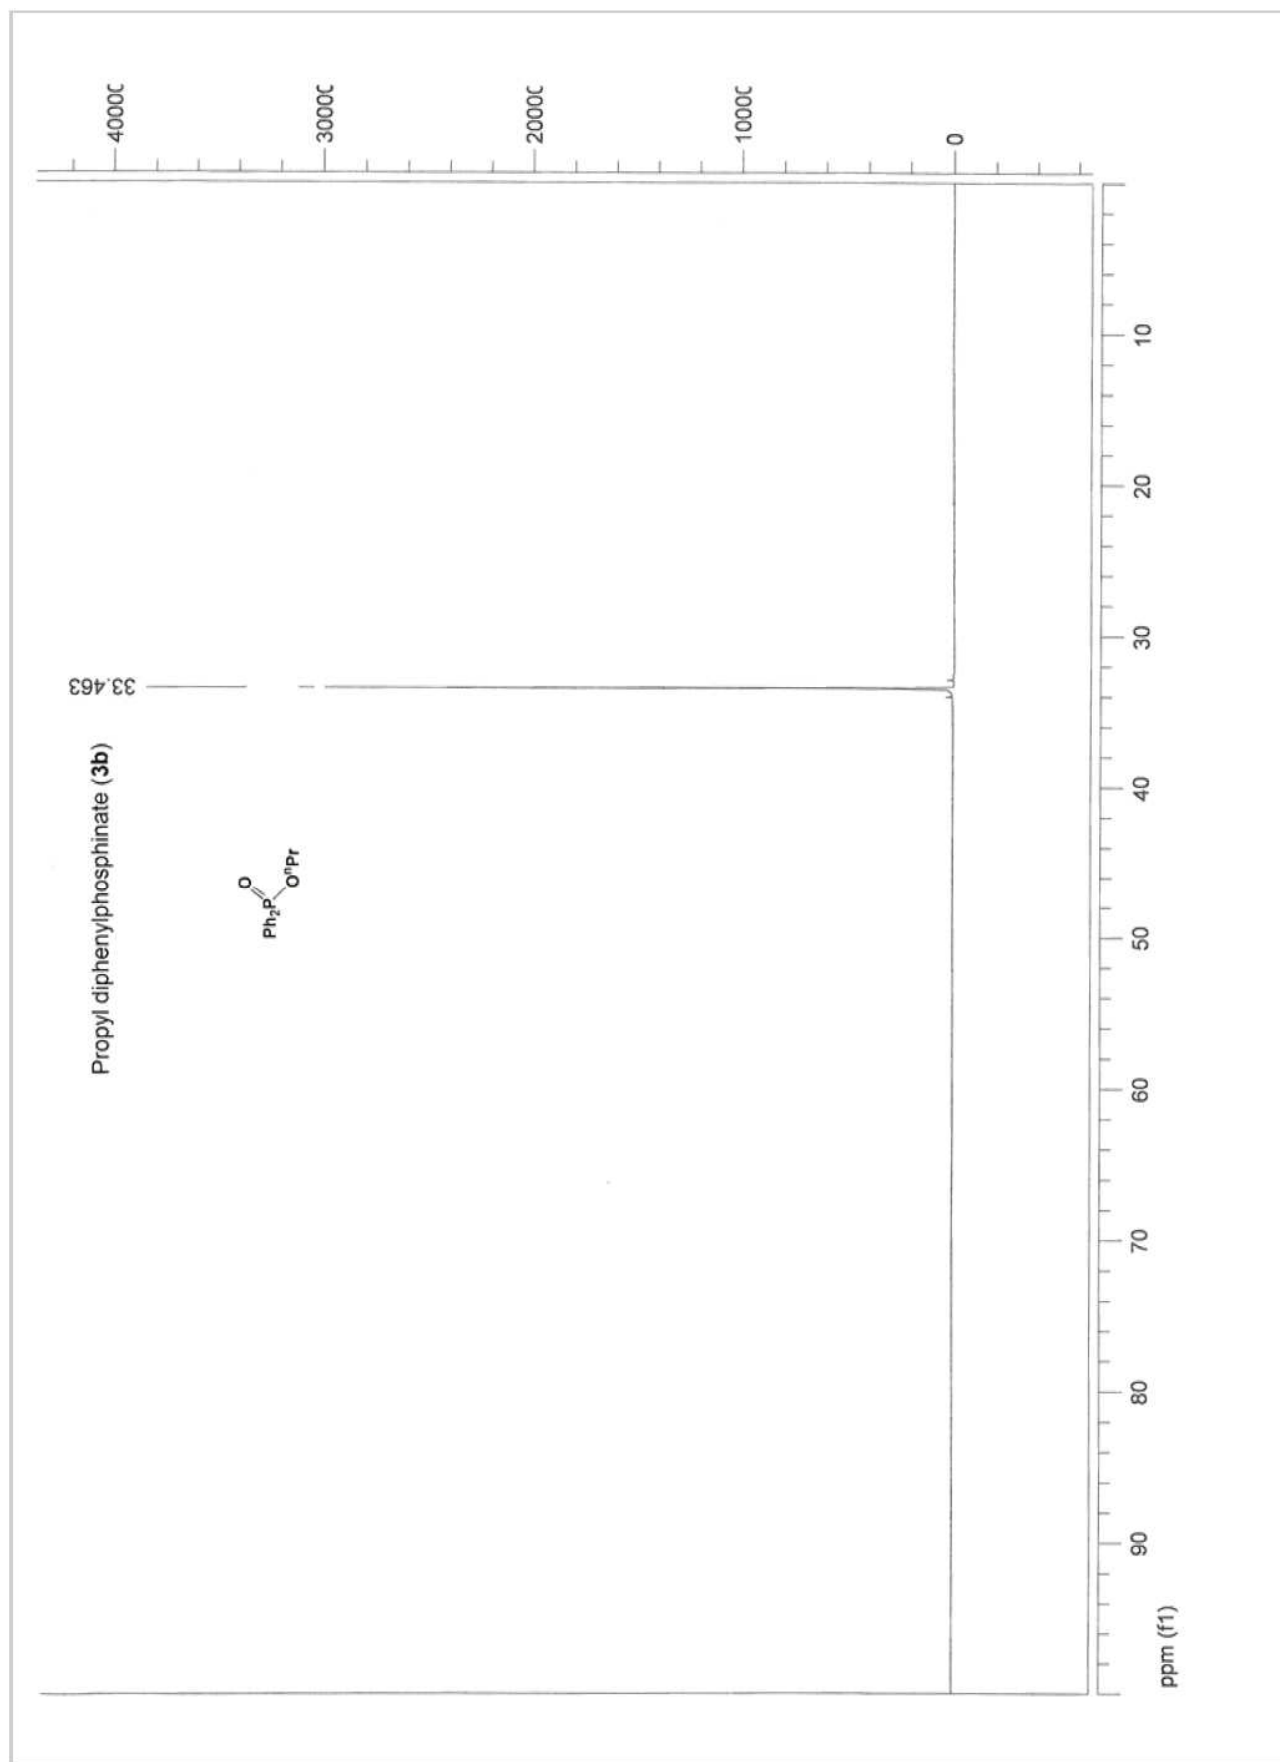

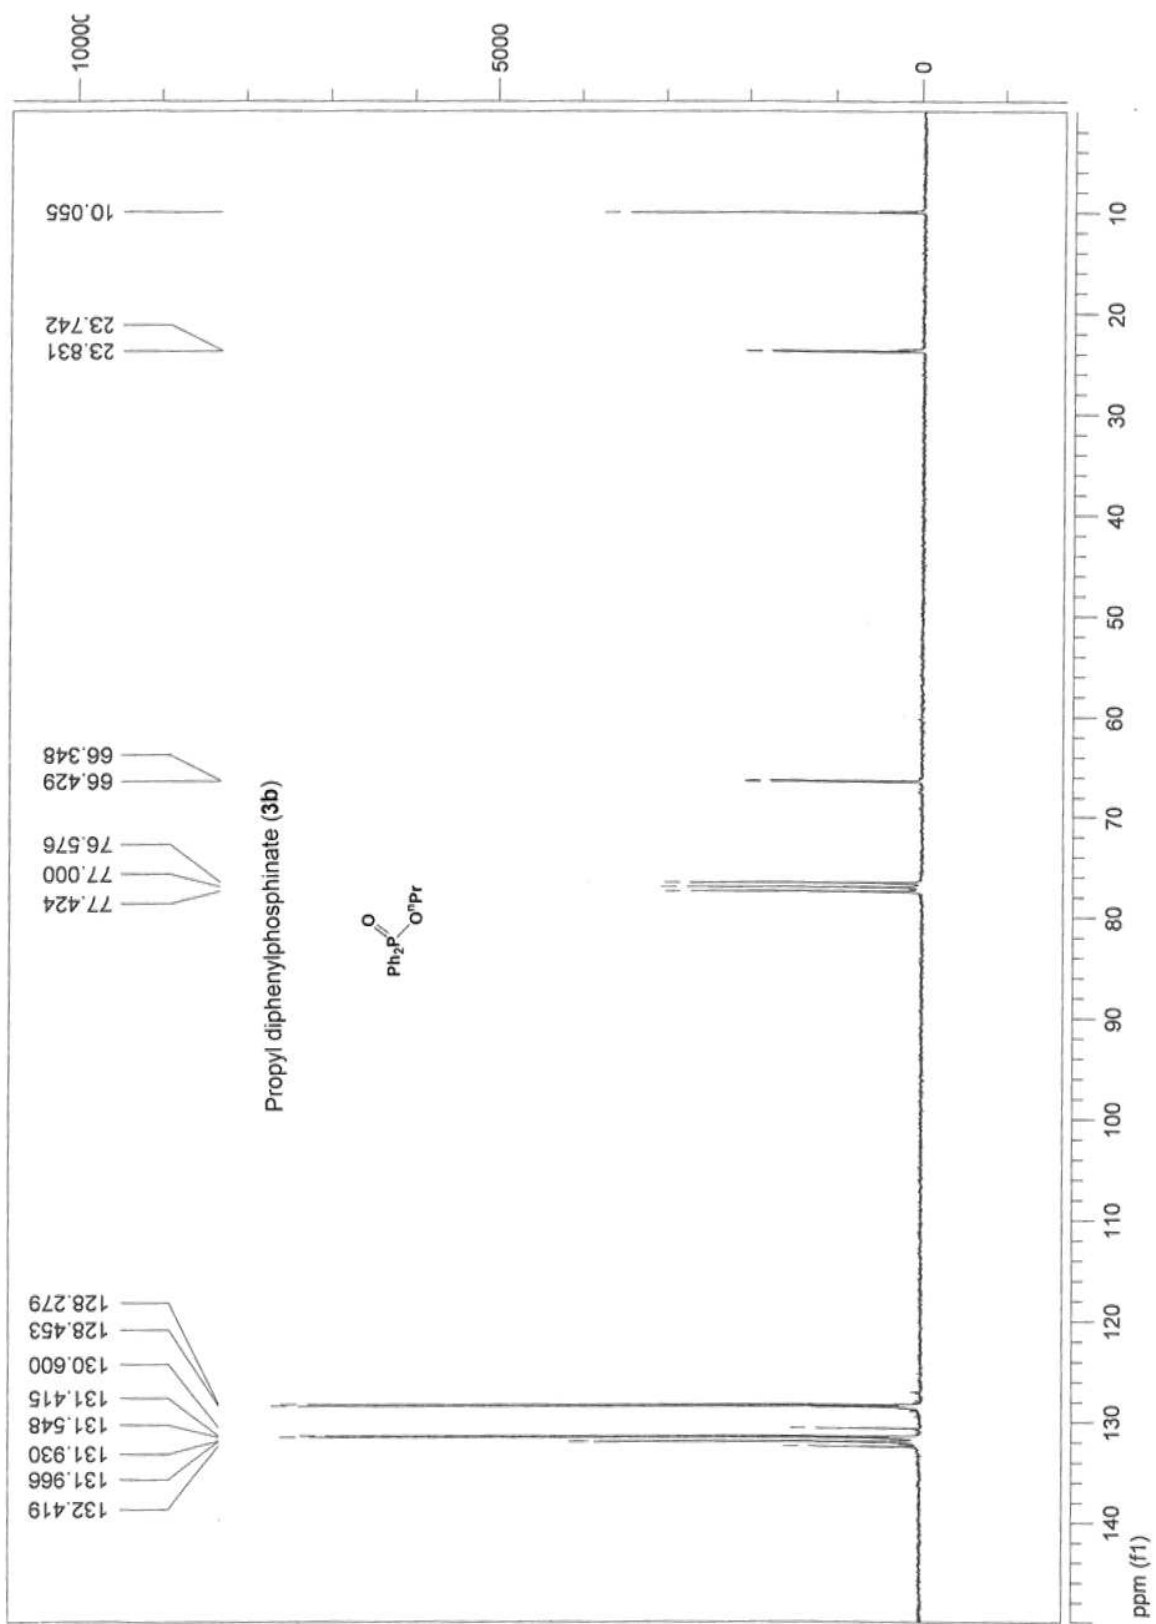

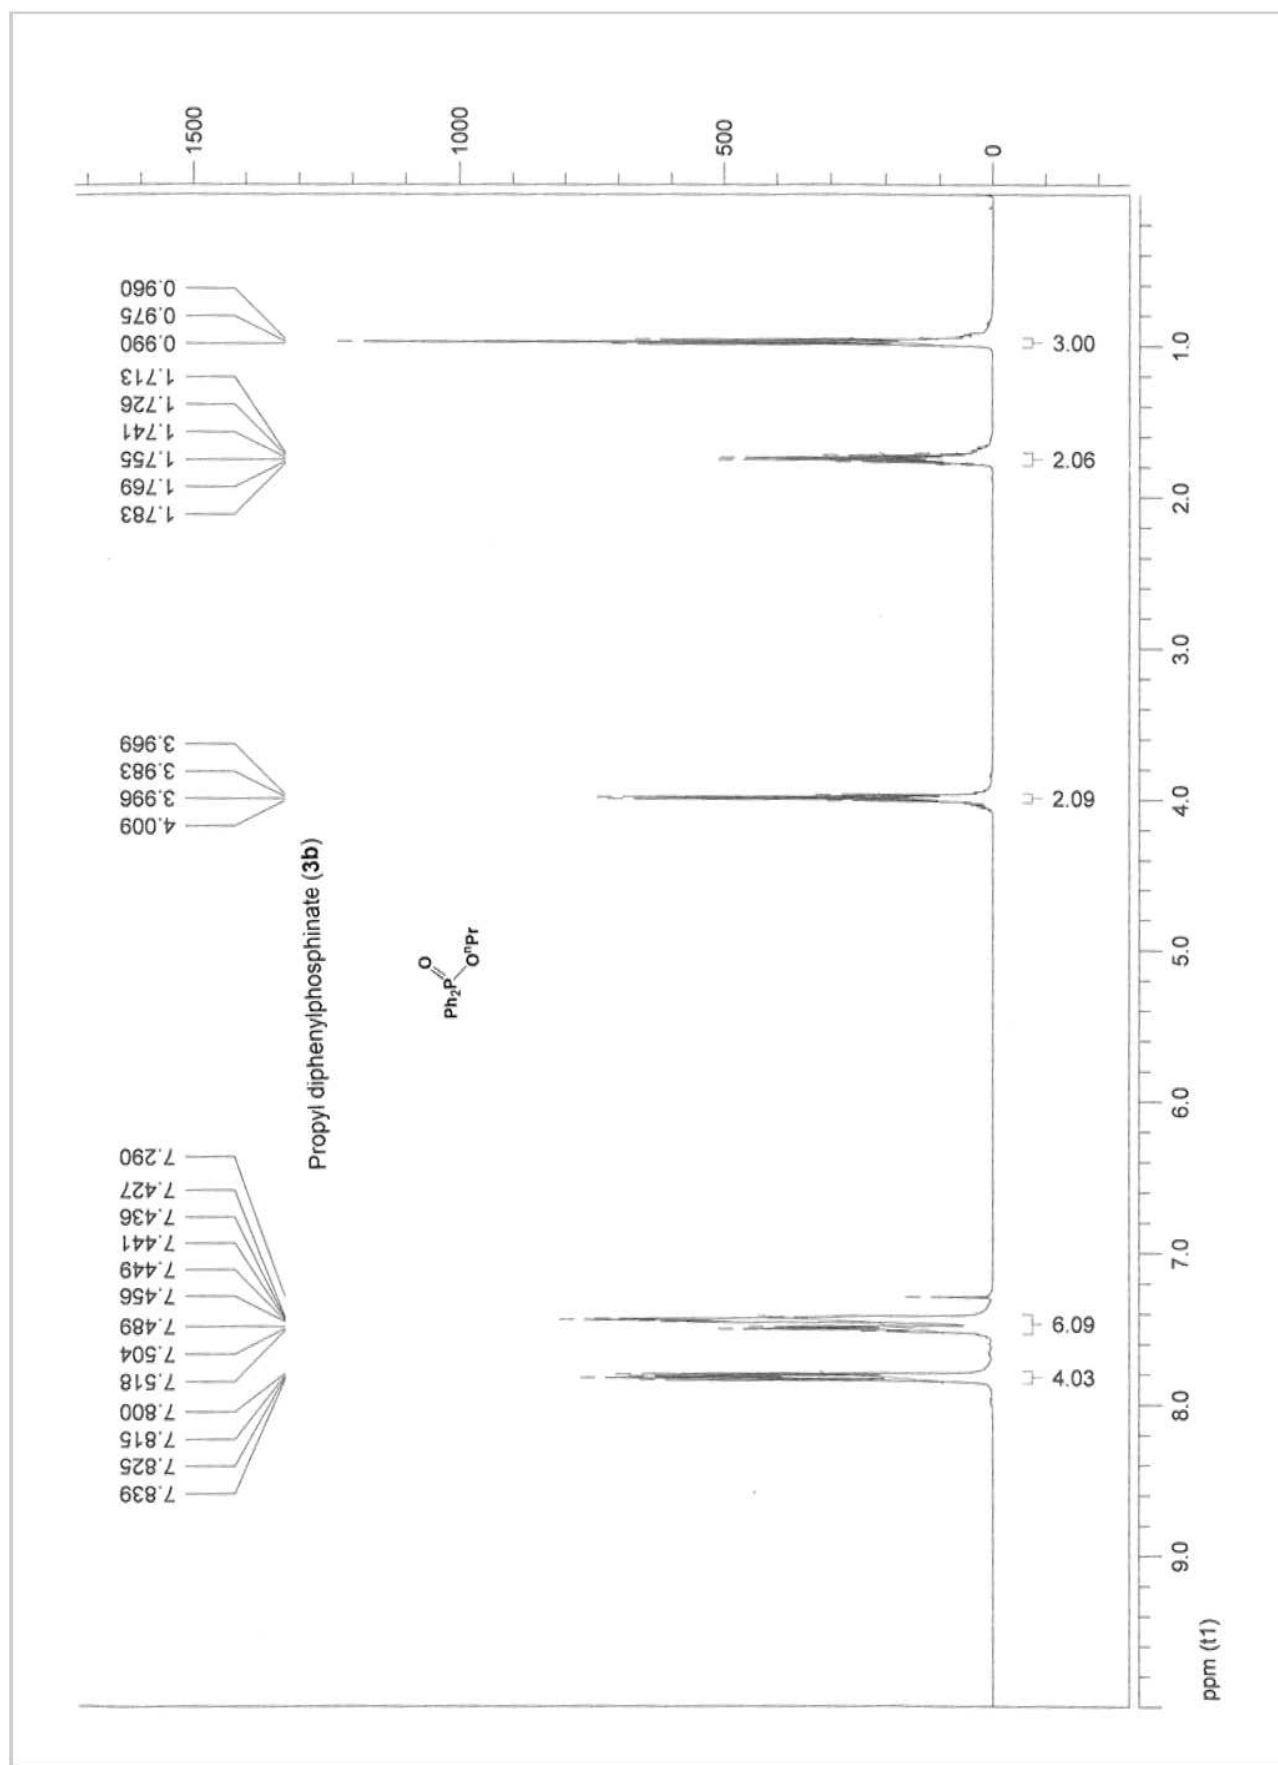

Isopropyl diphenylphosphinate (3c)

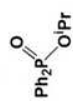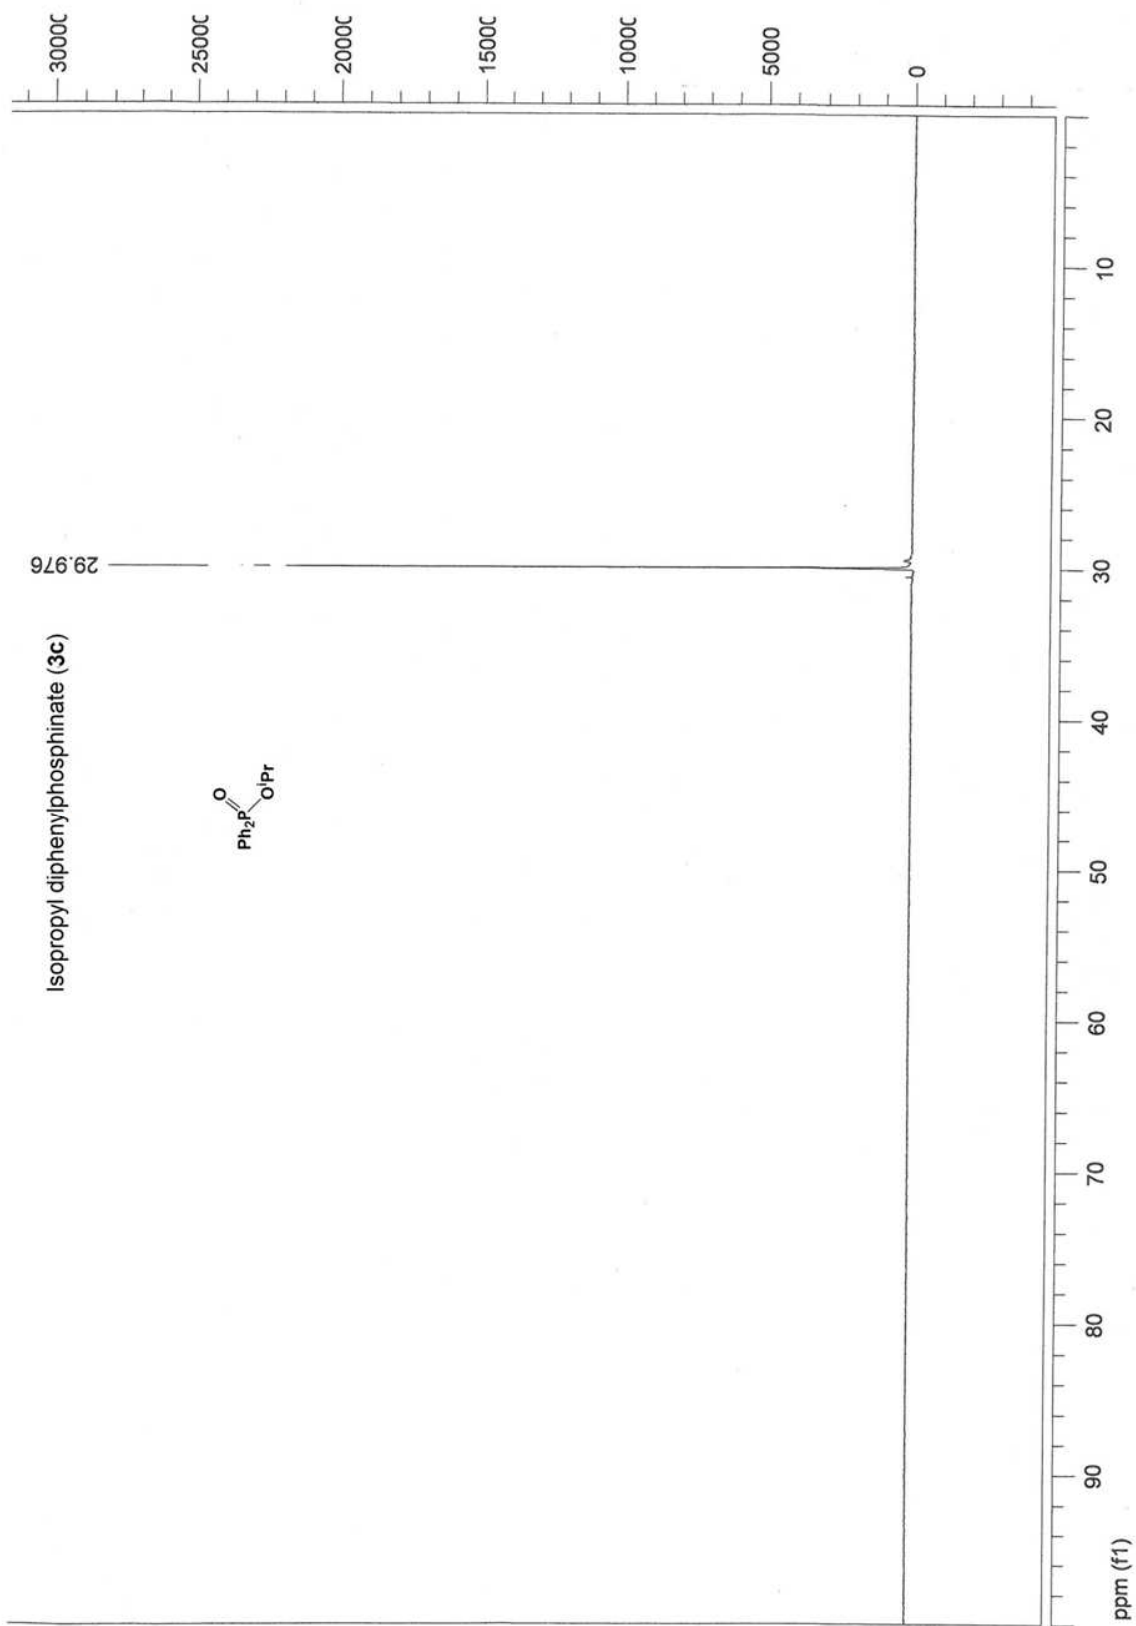

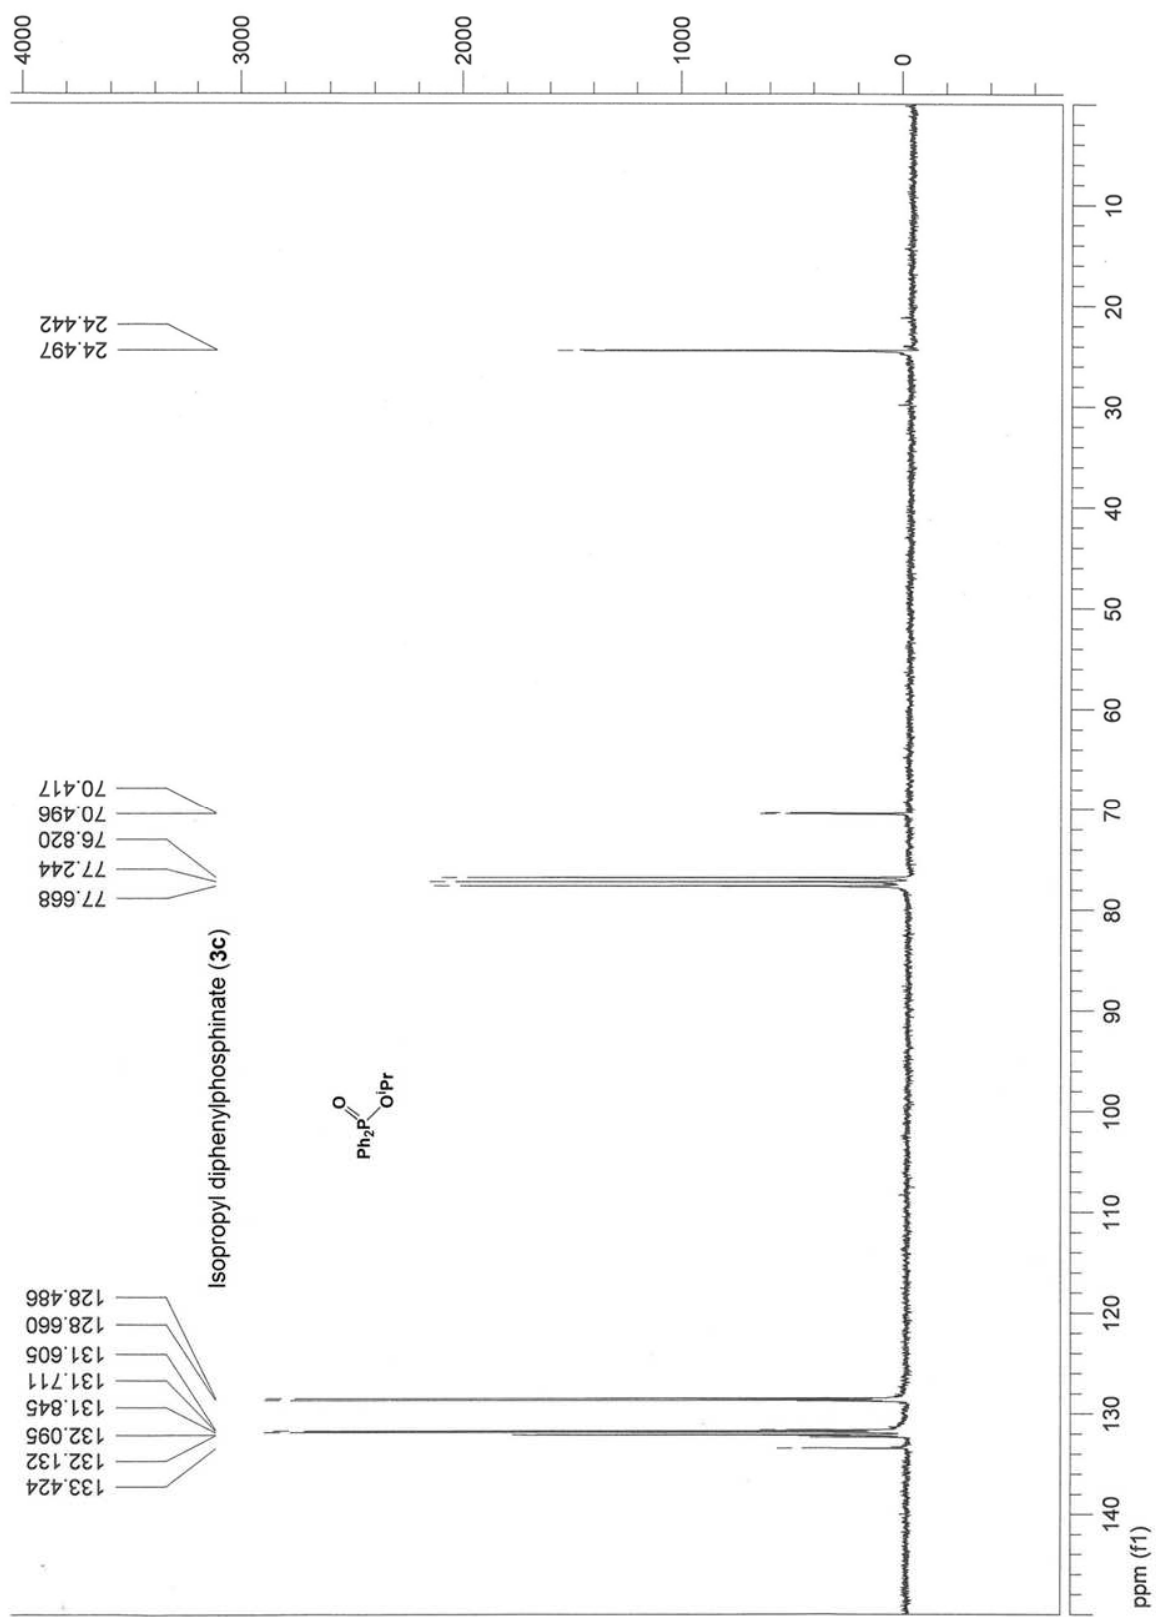

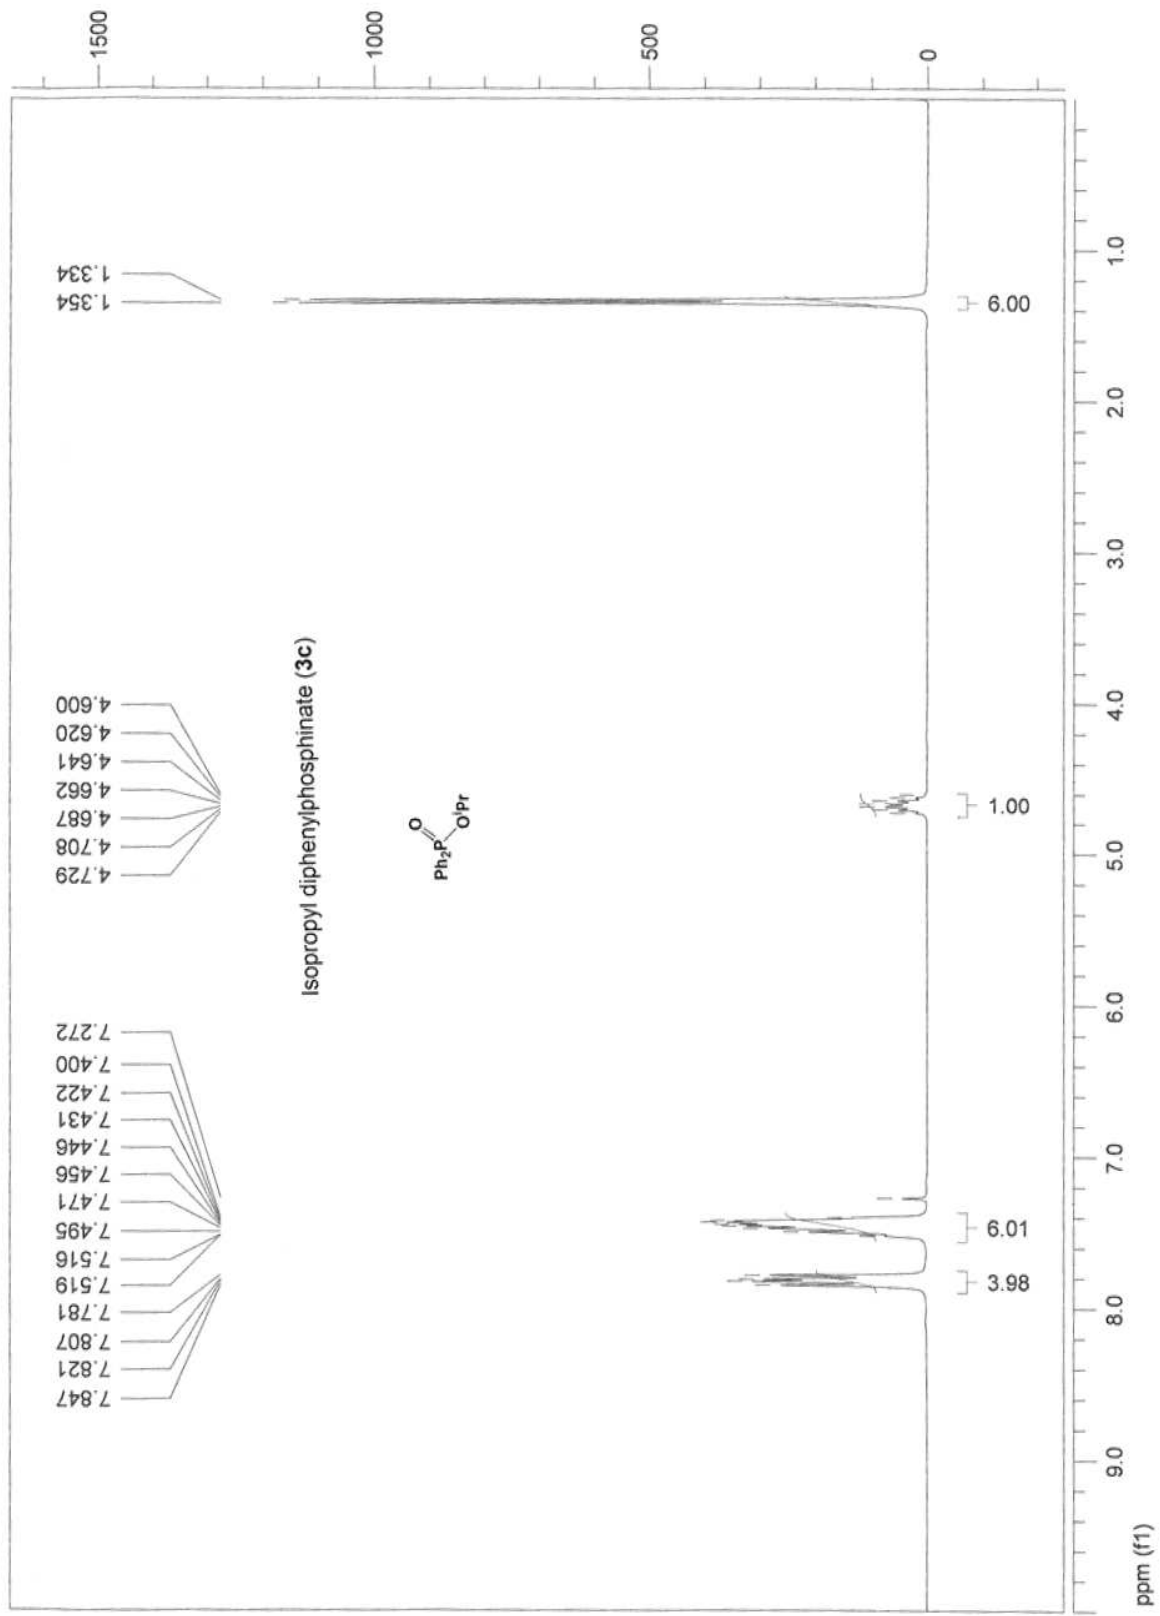

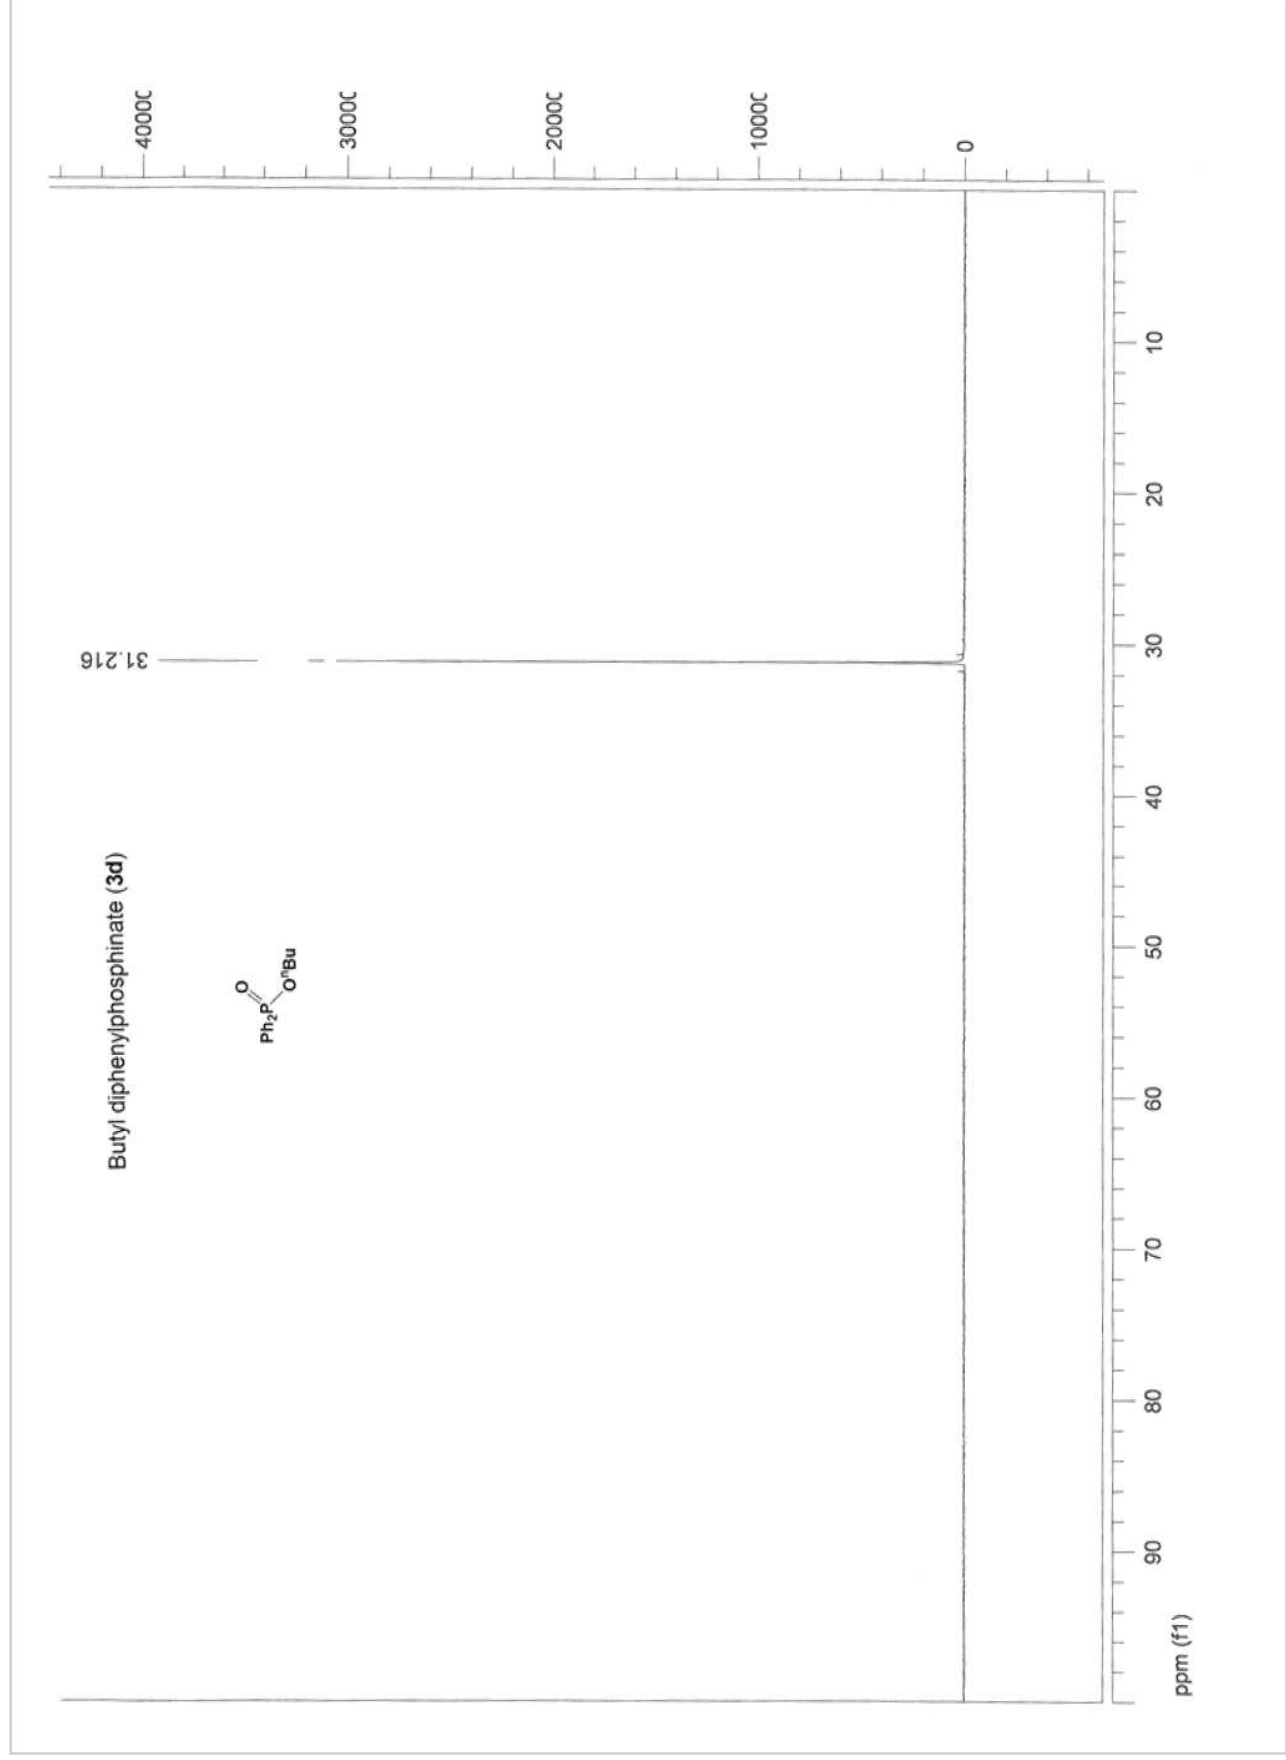



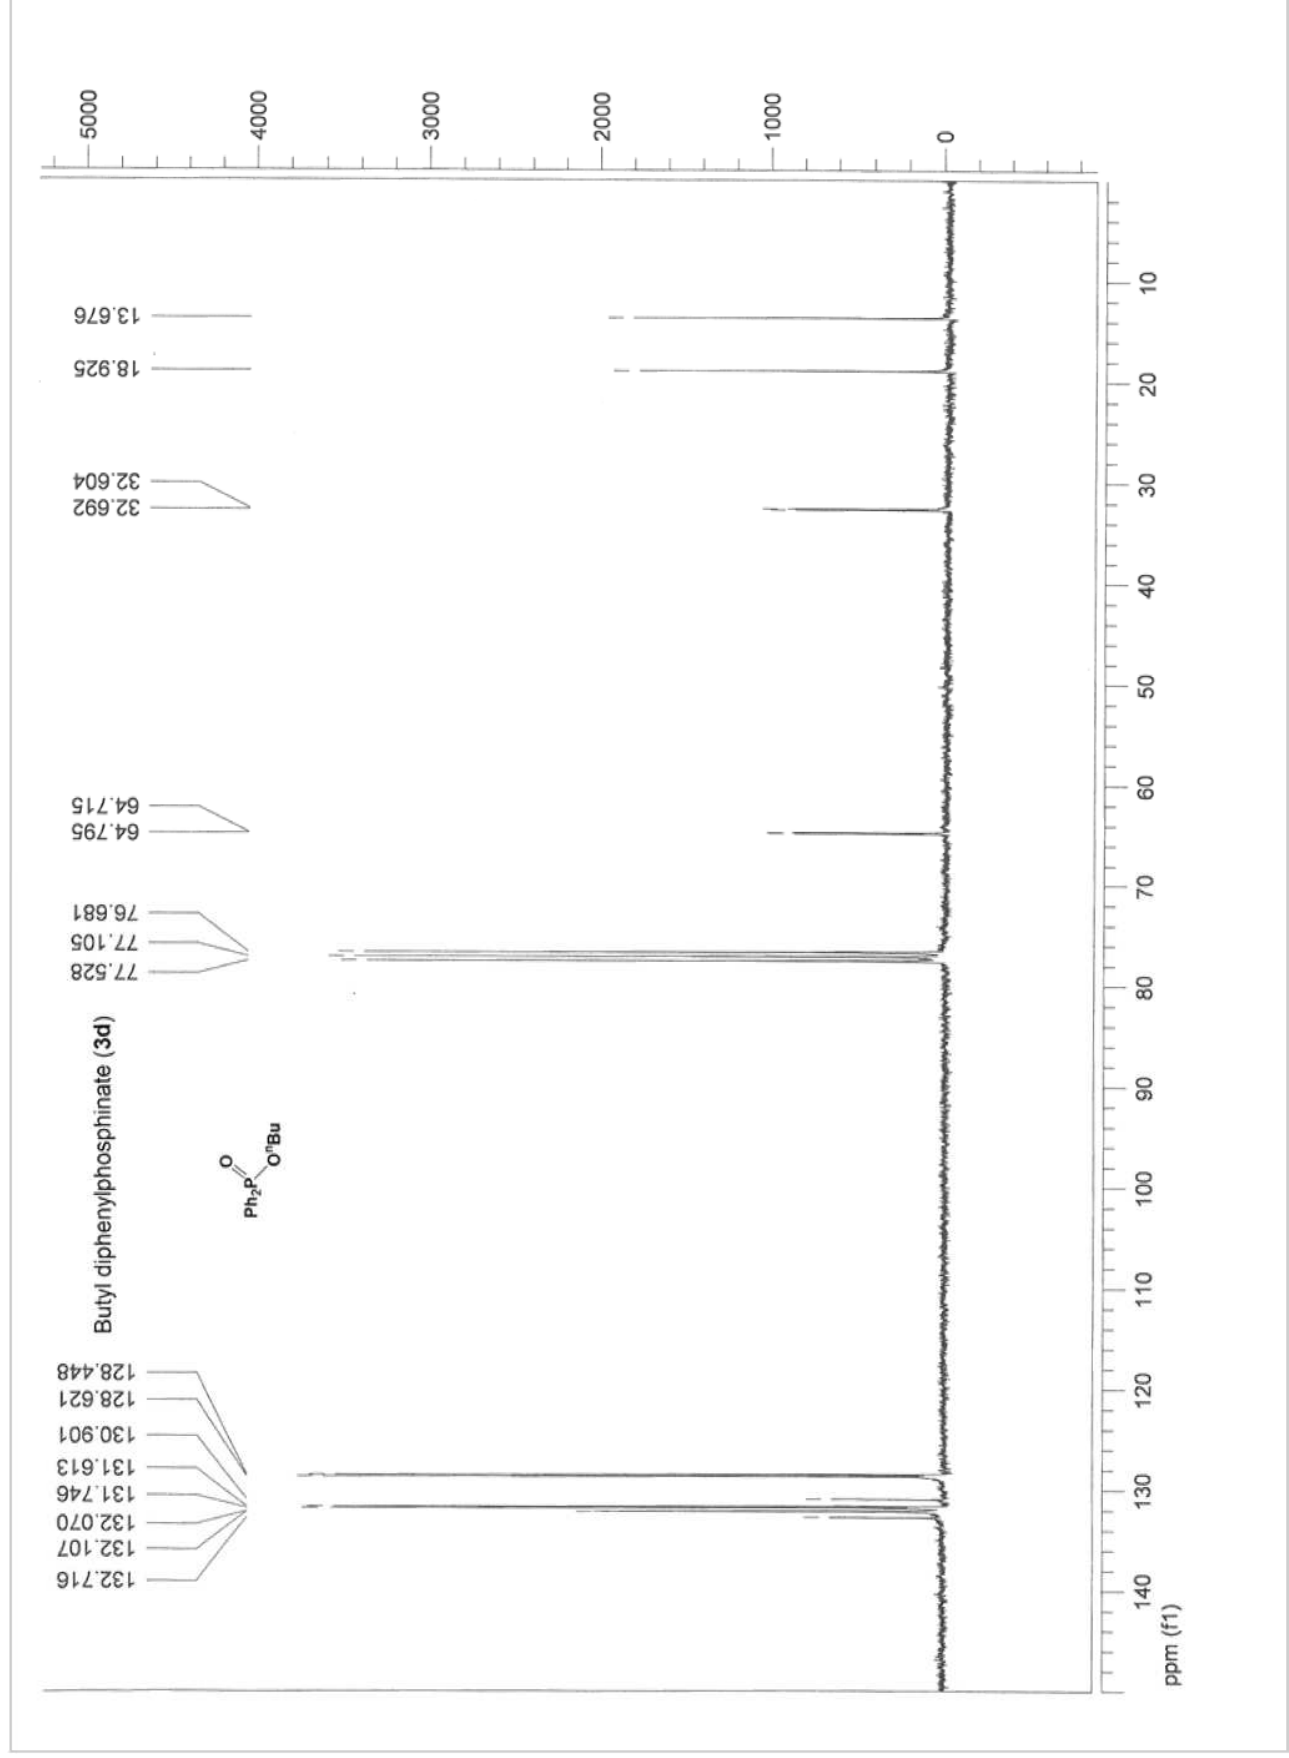

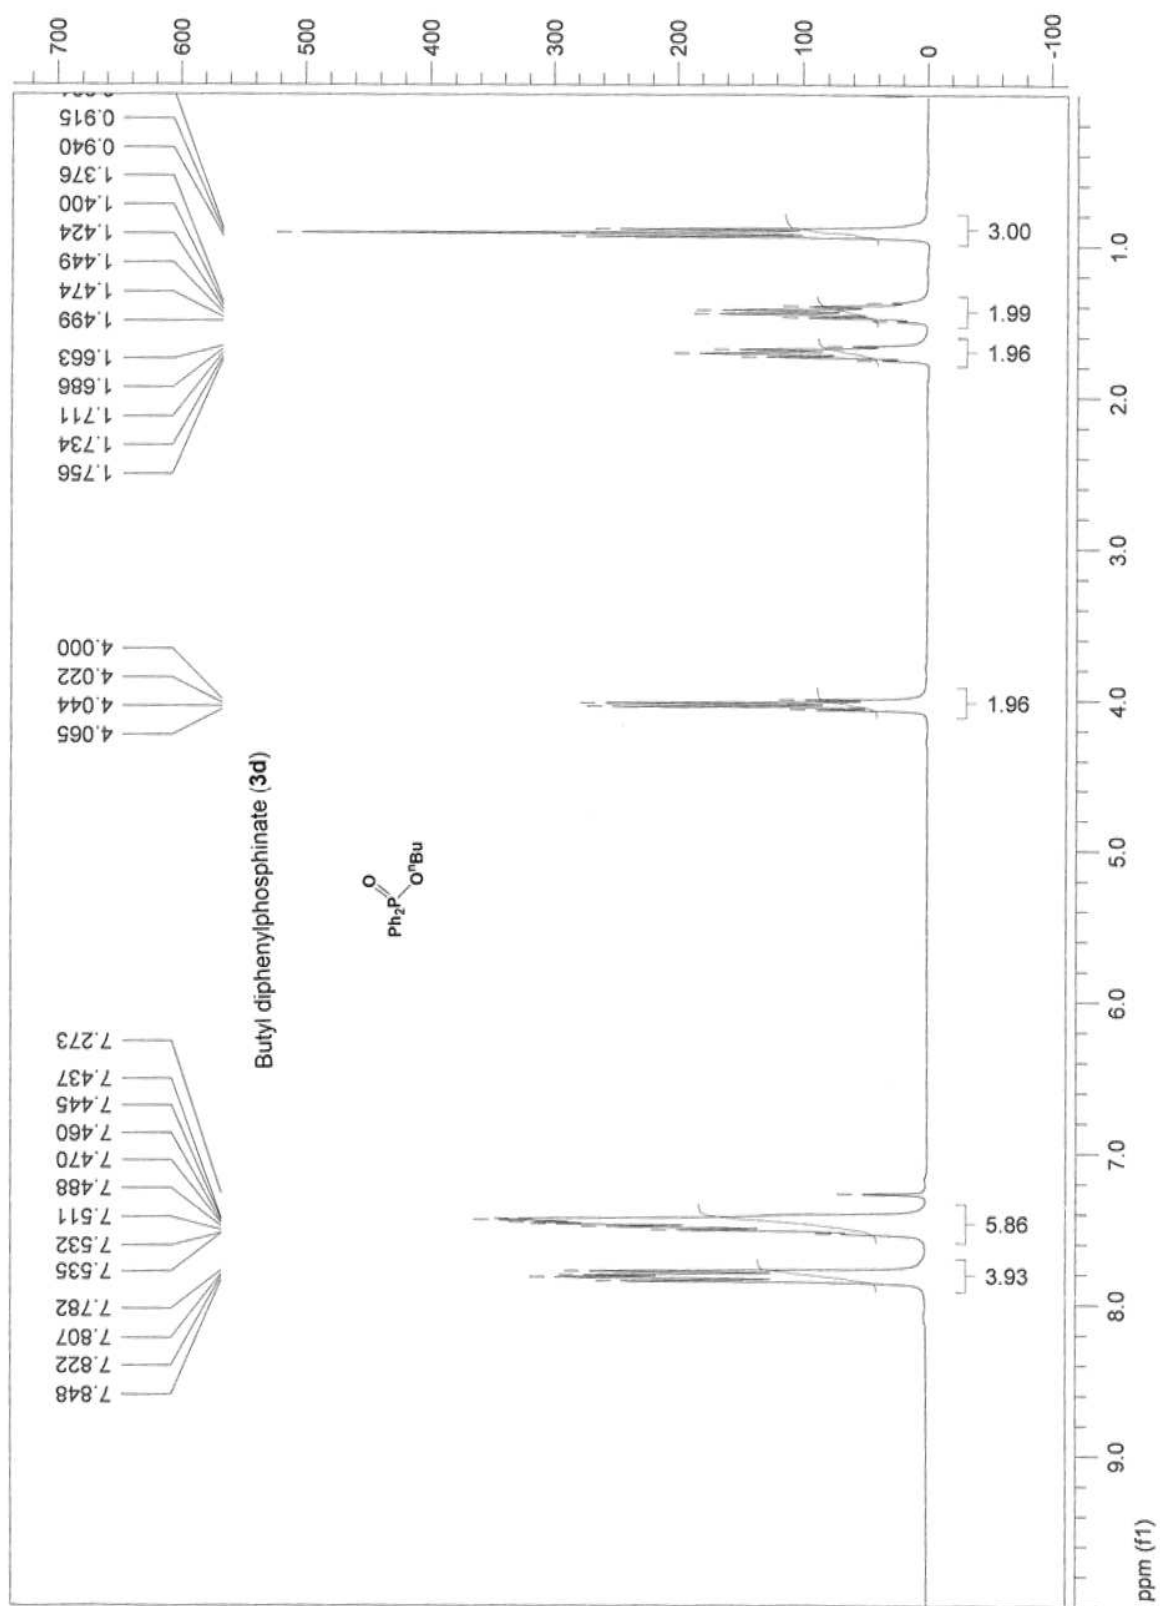

Isobutyl diphenylphosphinate (3e)

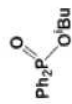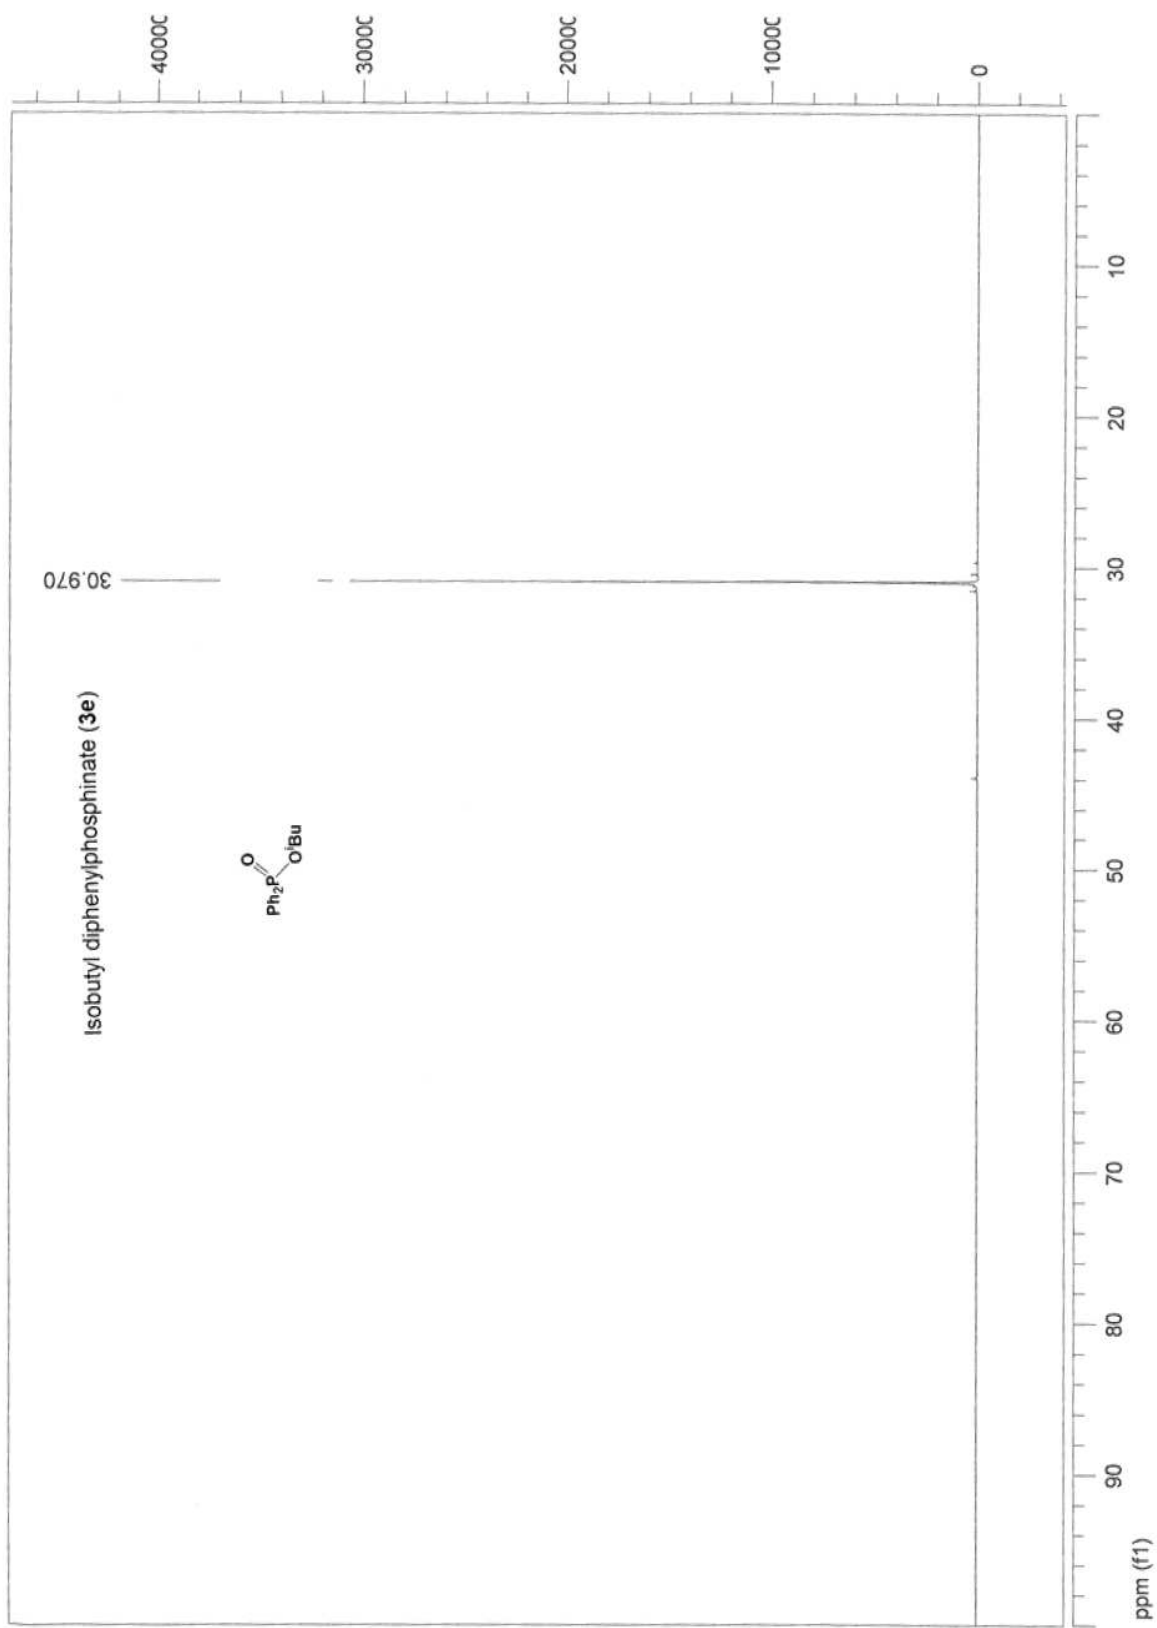

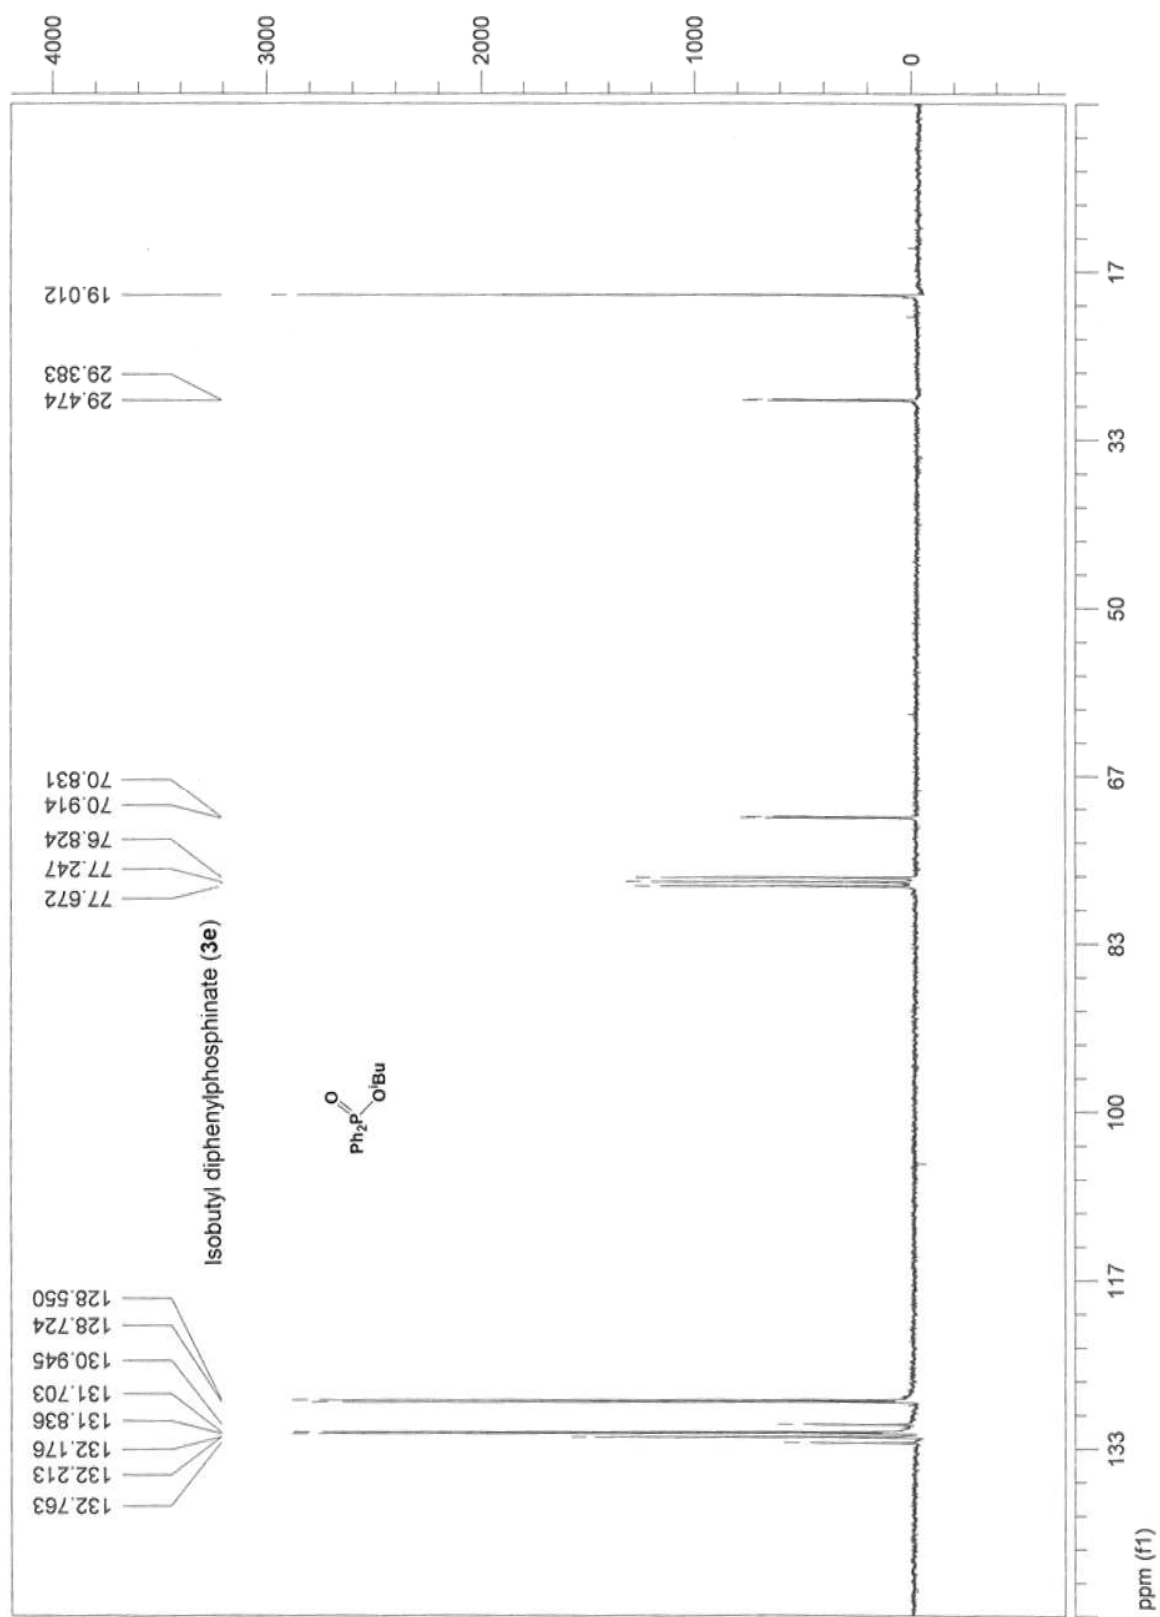

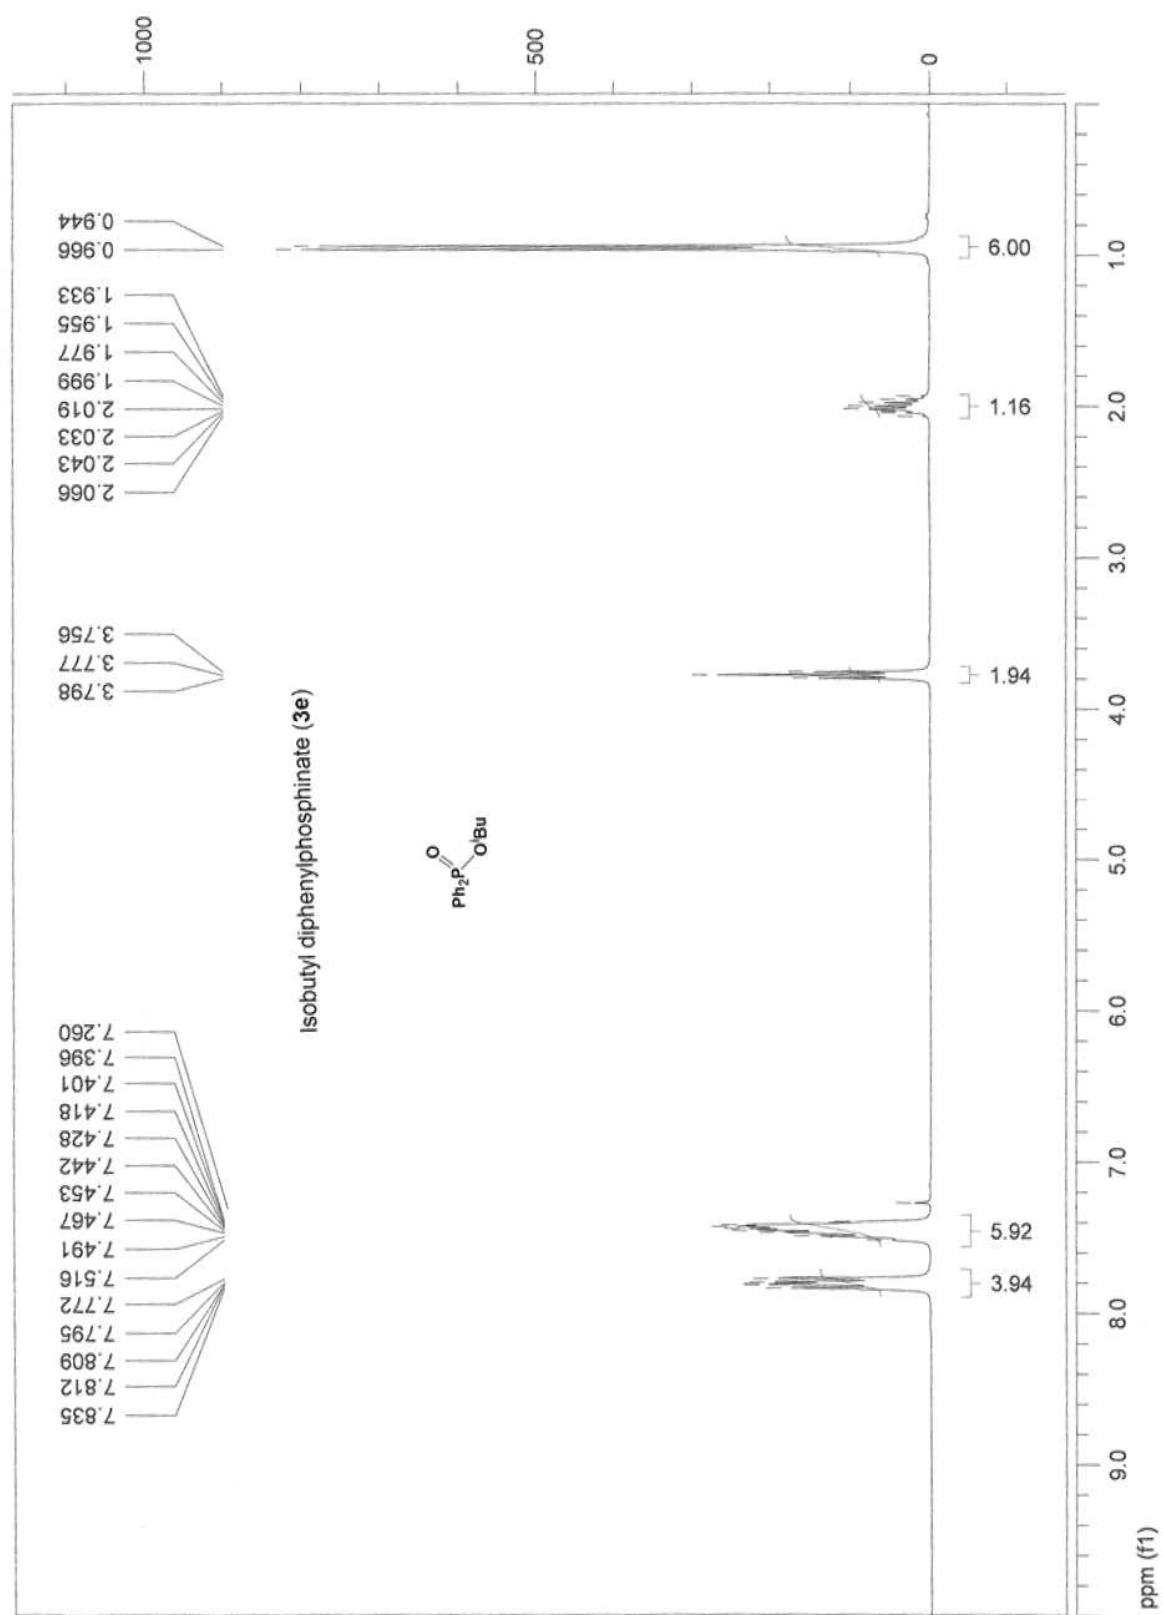

Isopentyl diphenylphosphinate (3f)

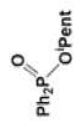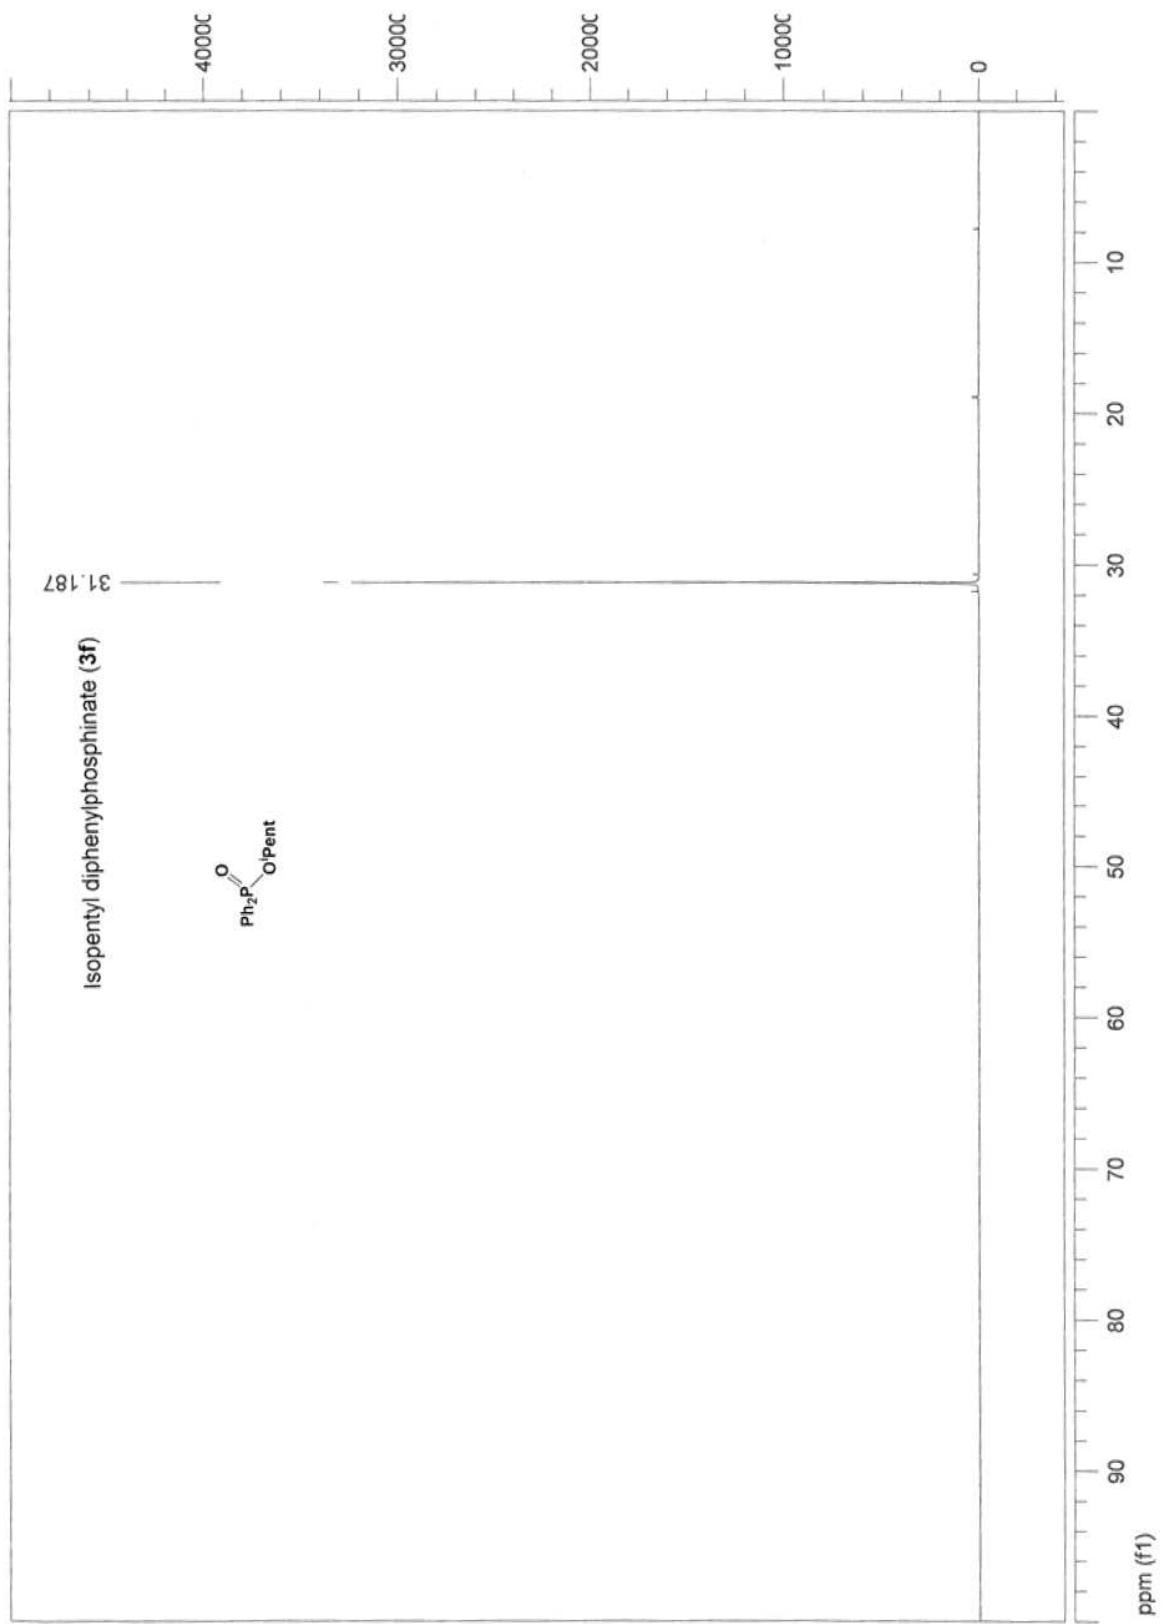

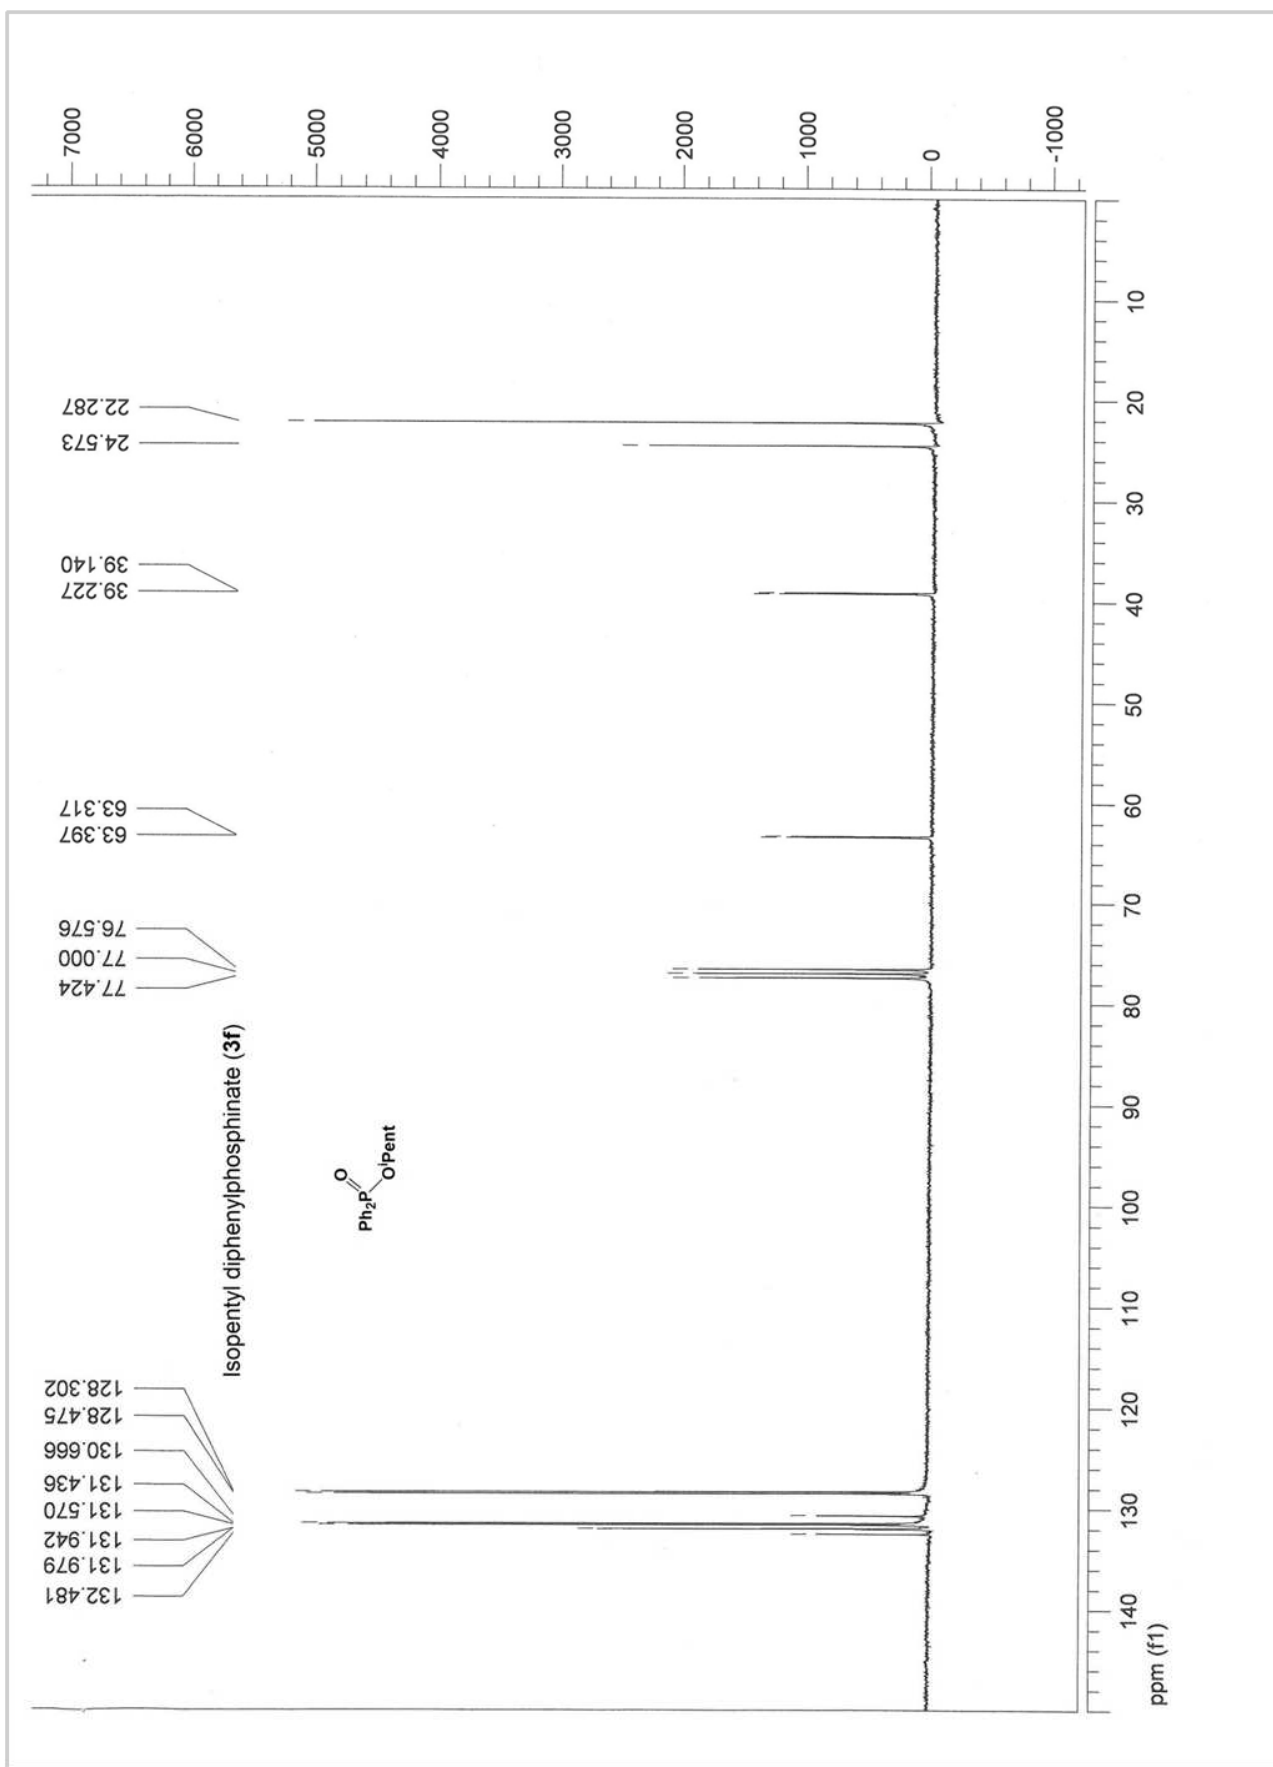

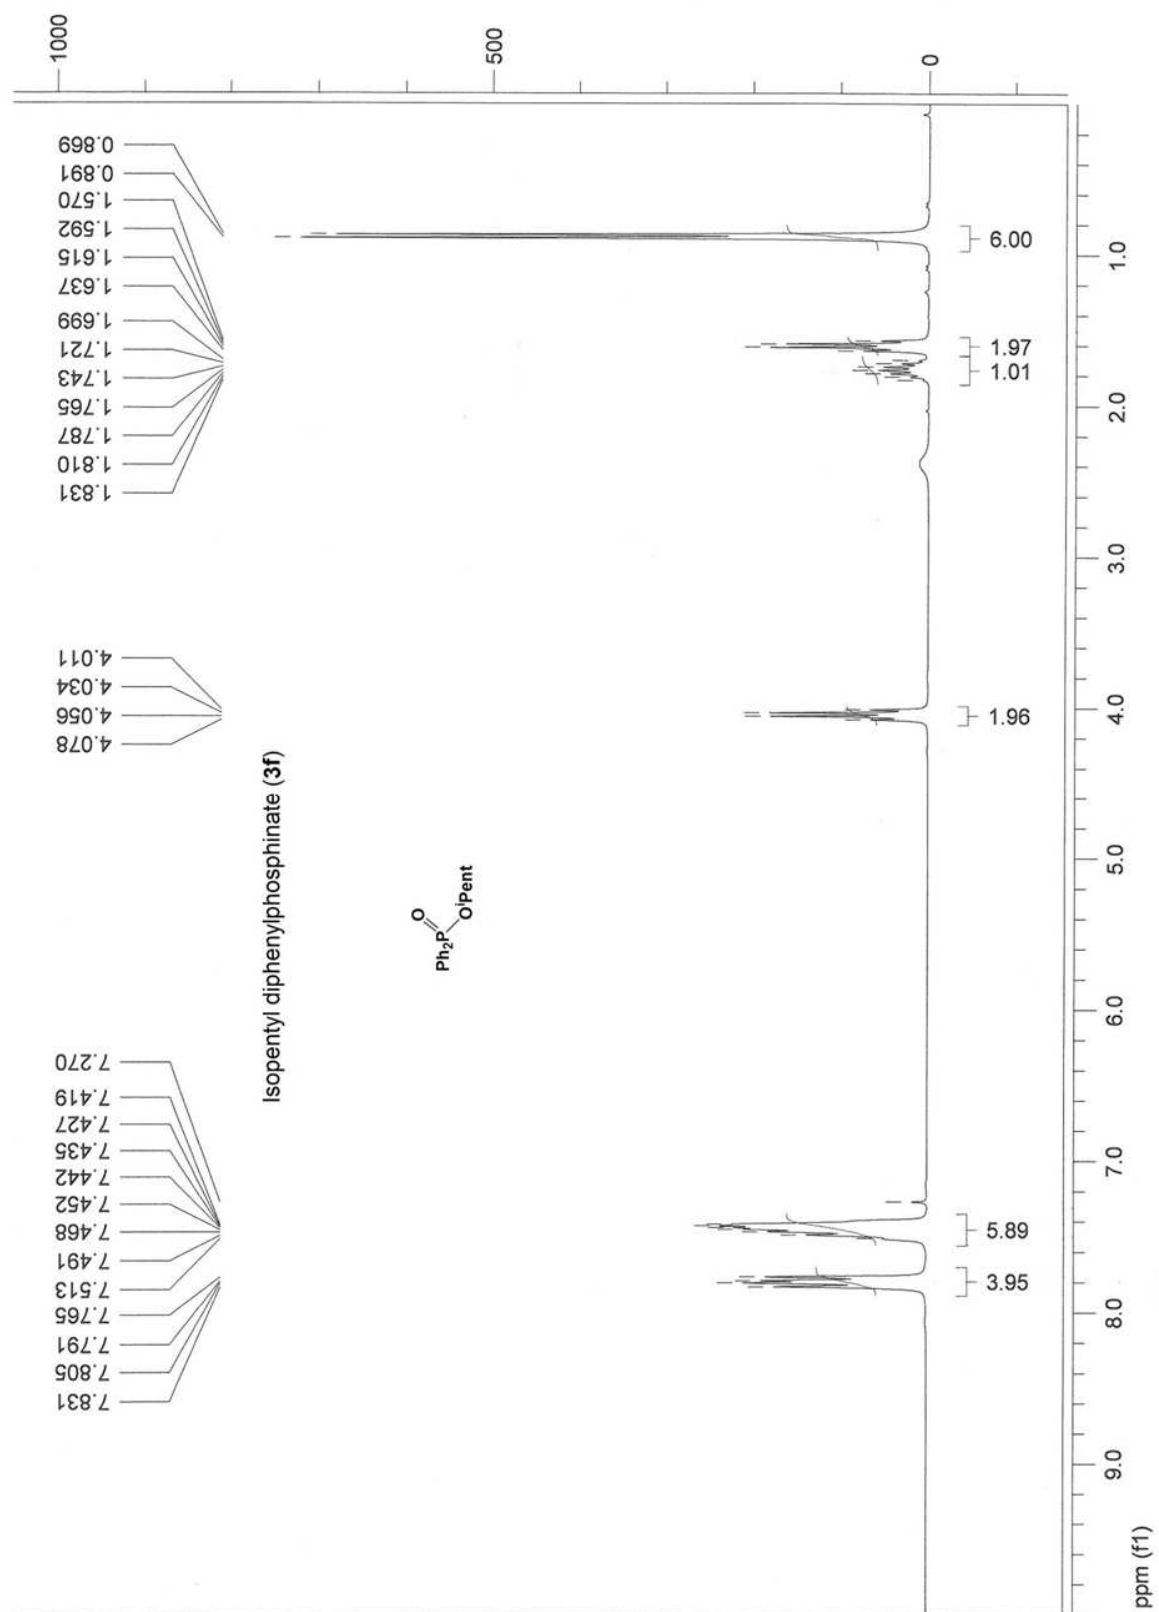



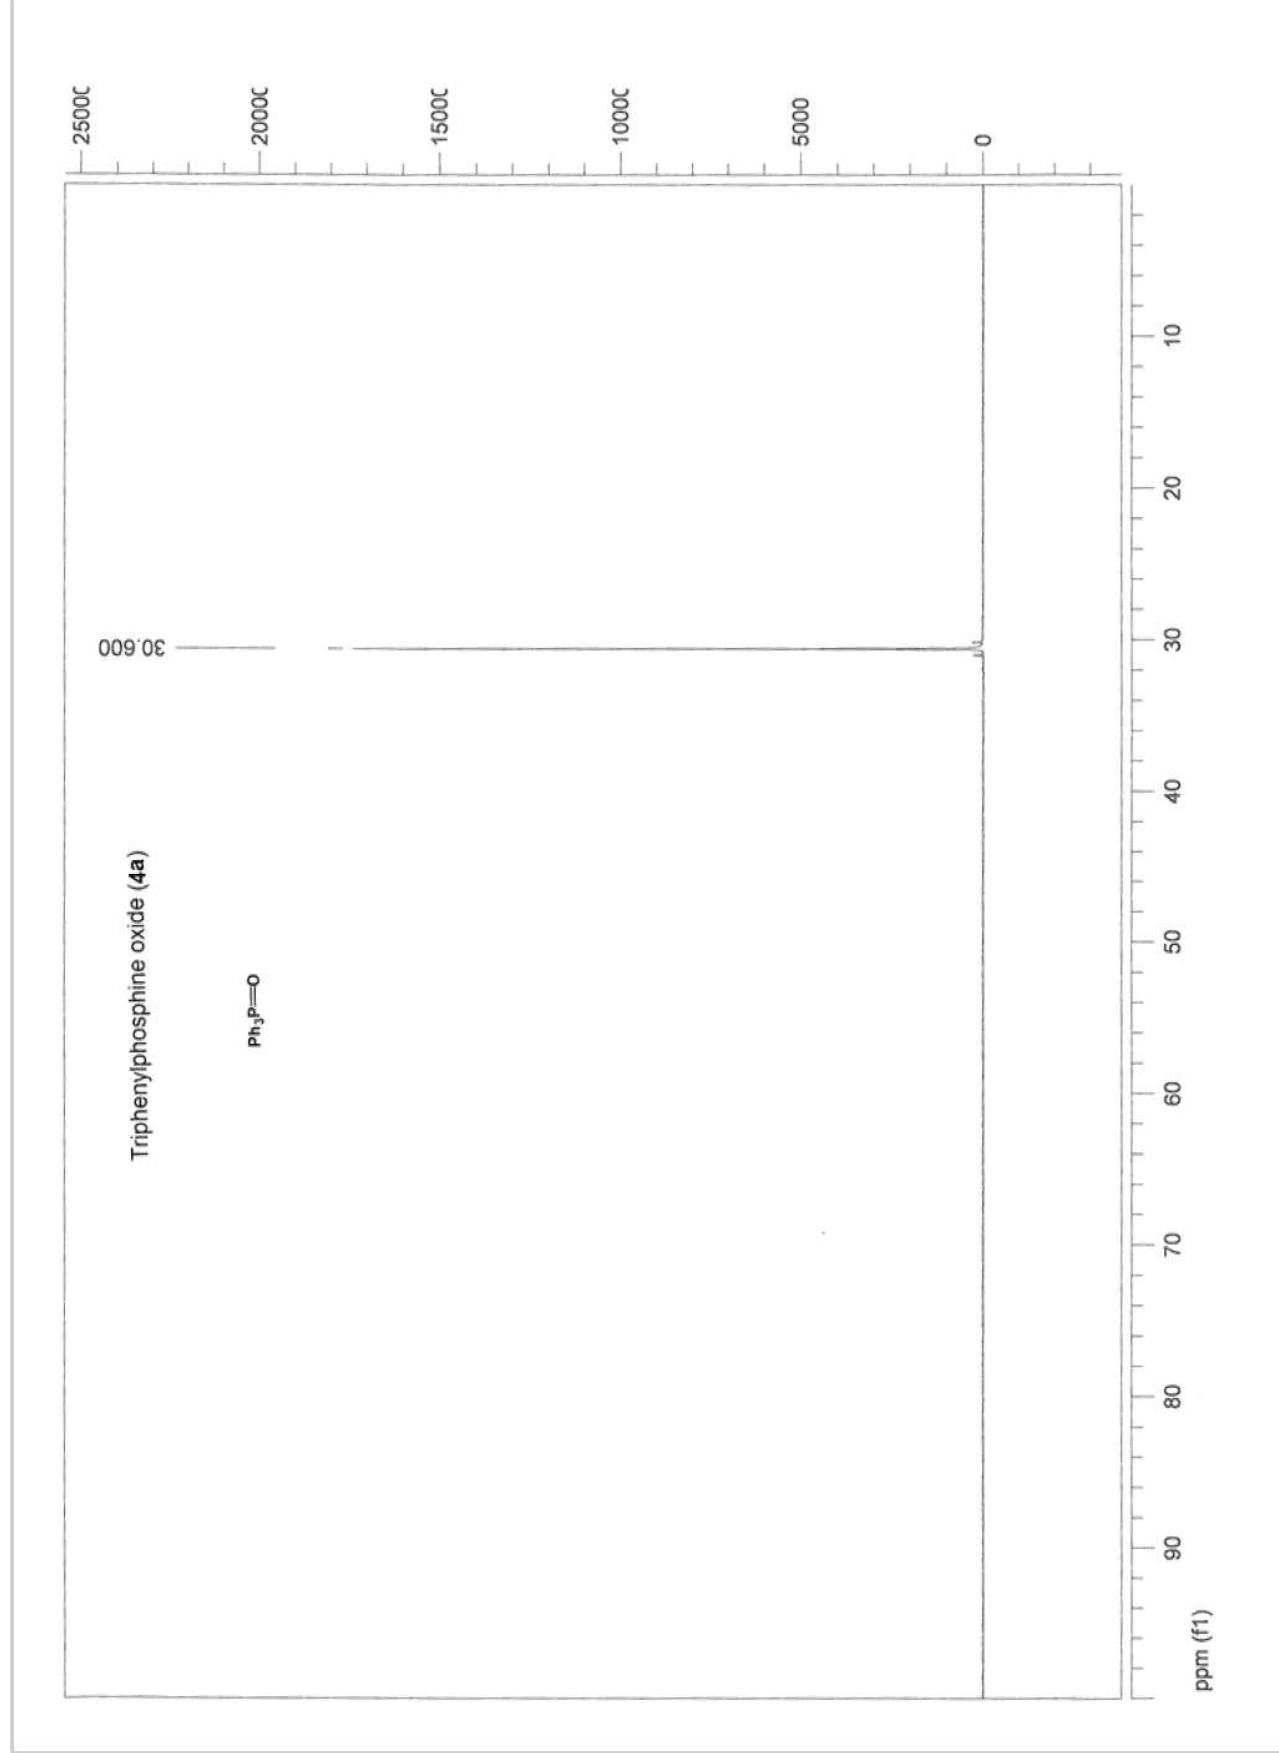

4-Methylphenyl diphenylphosphine Oxide (**4b**)

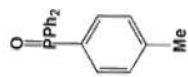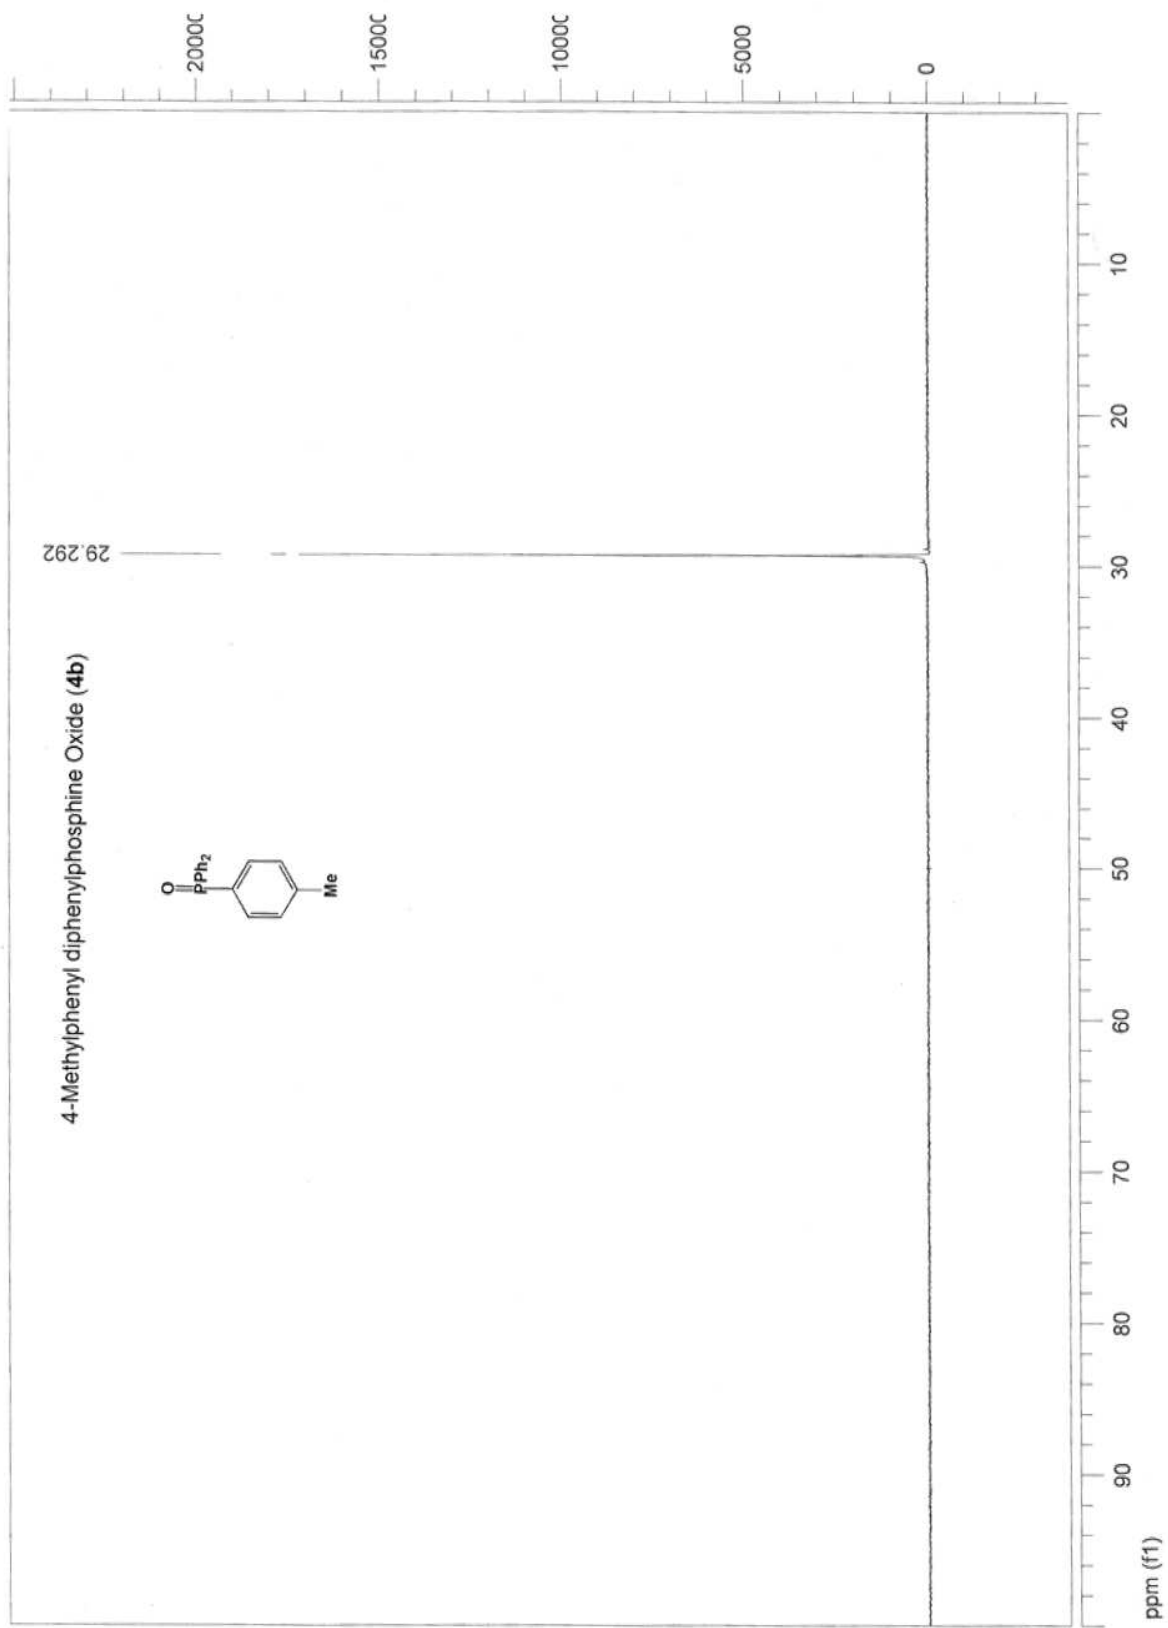

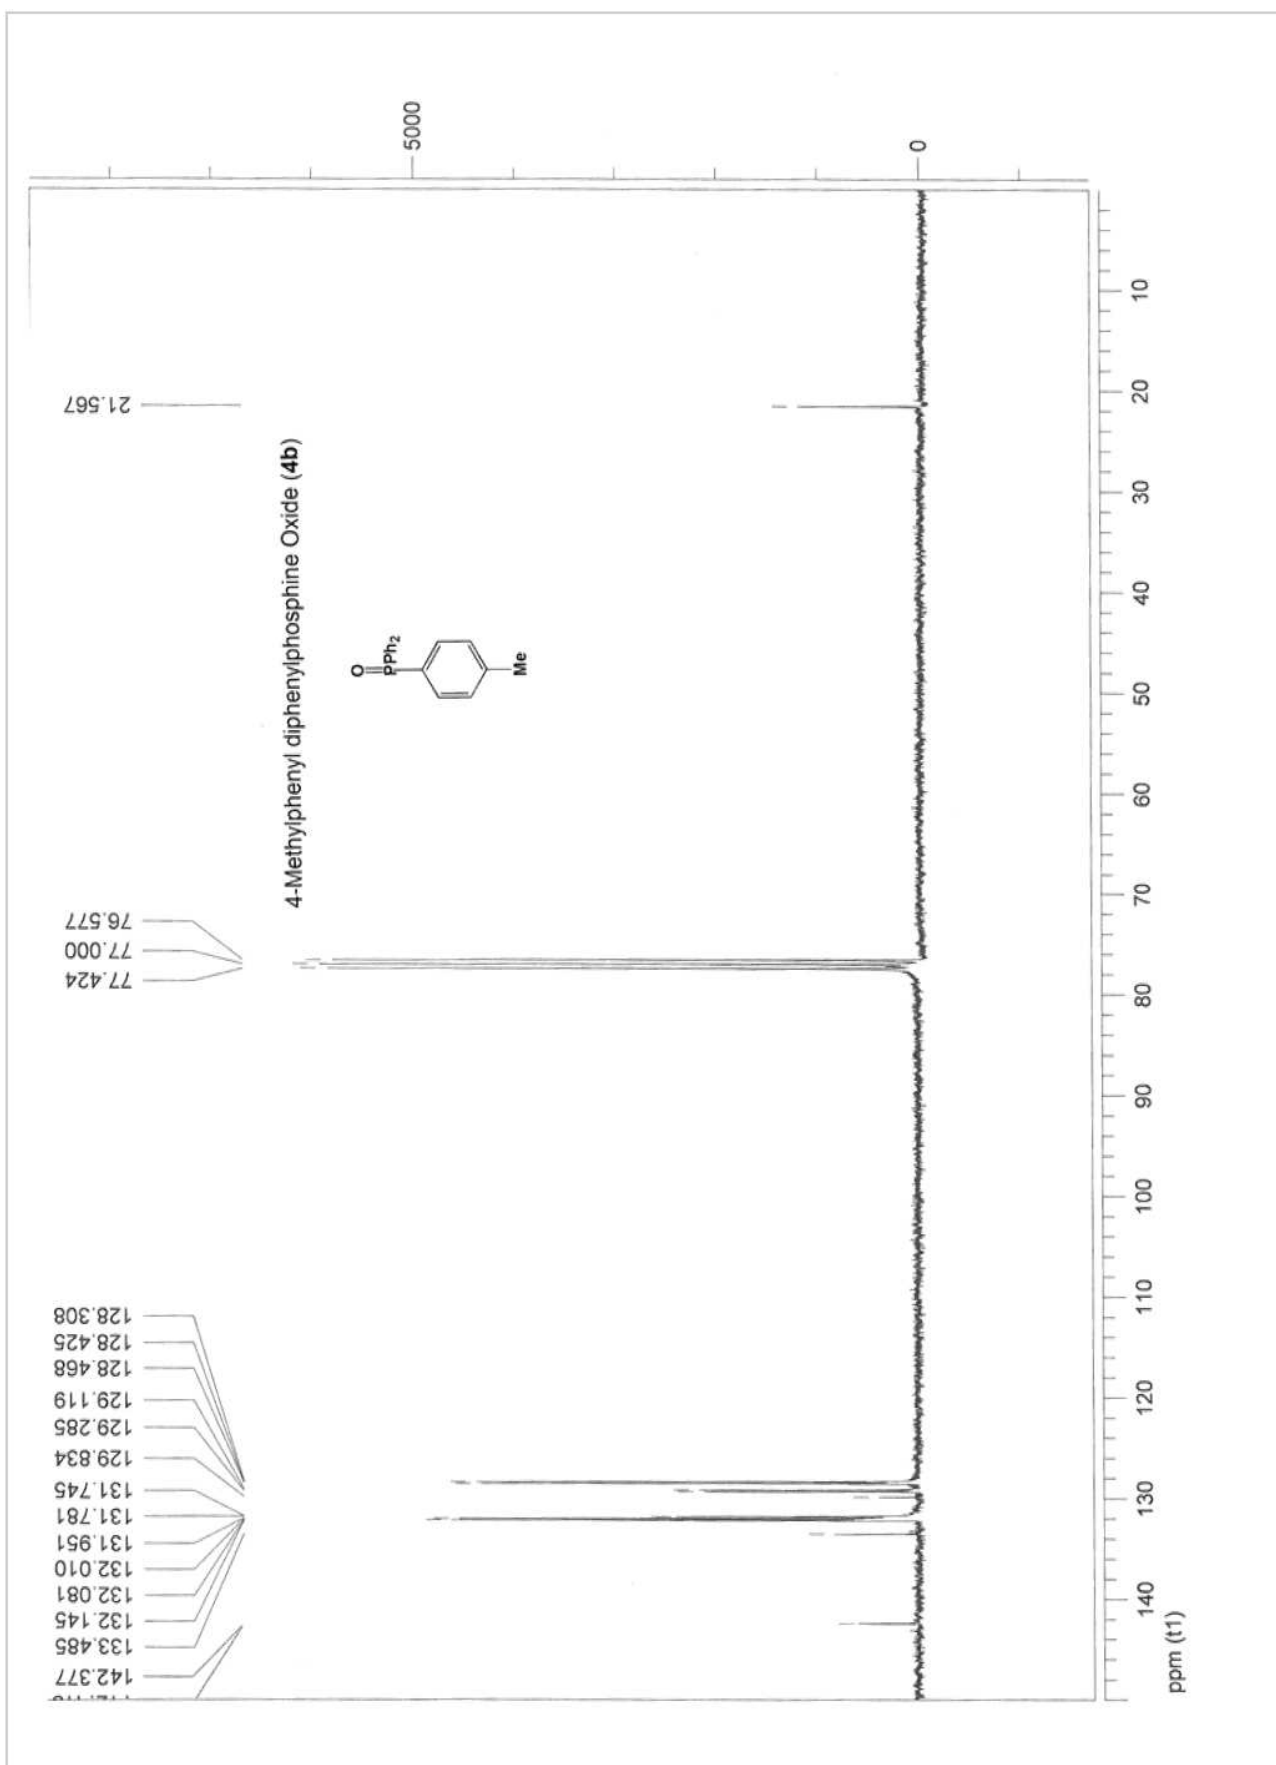

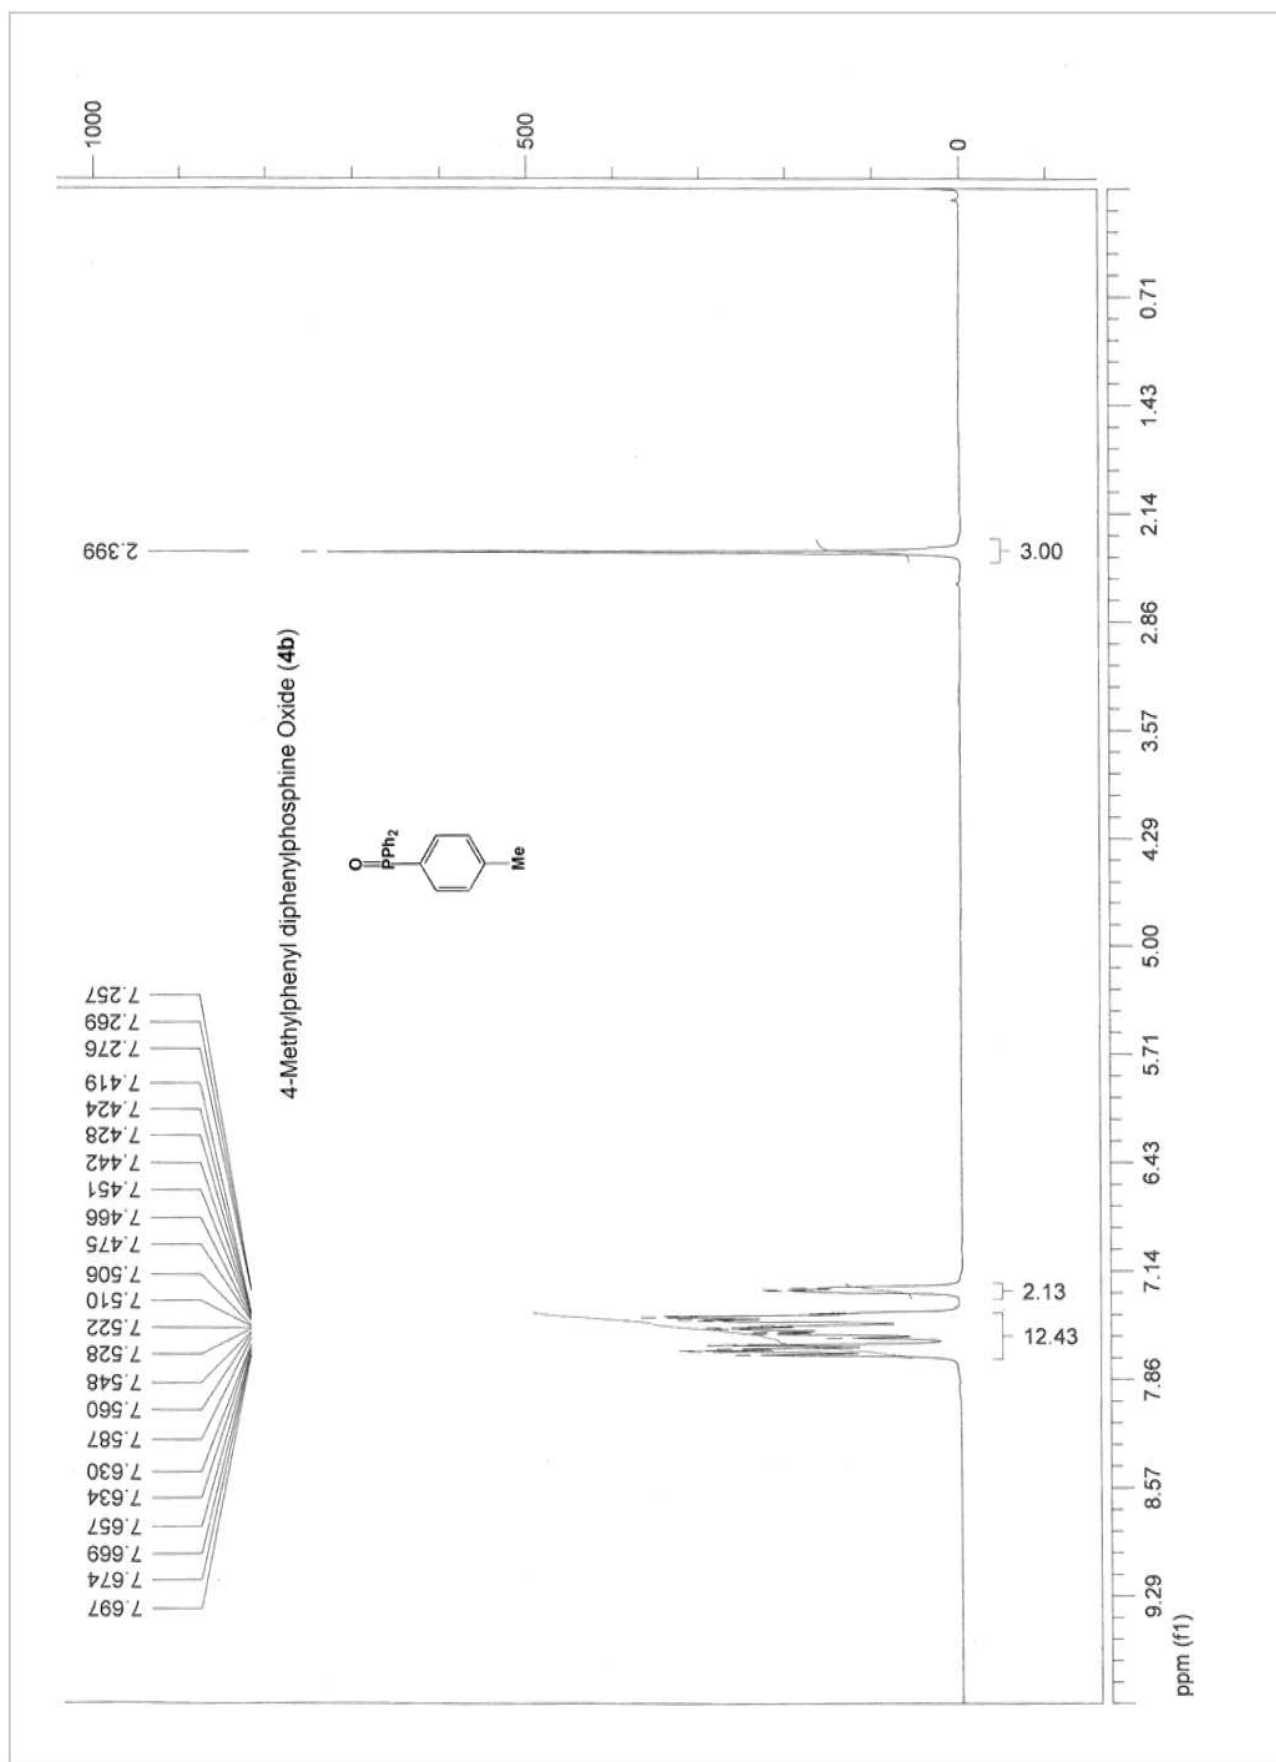

4-Chlorophenyl diphenylphosphine Oxide (**4c**)

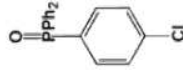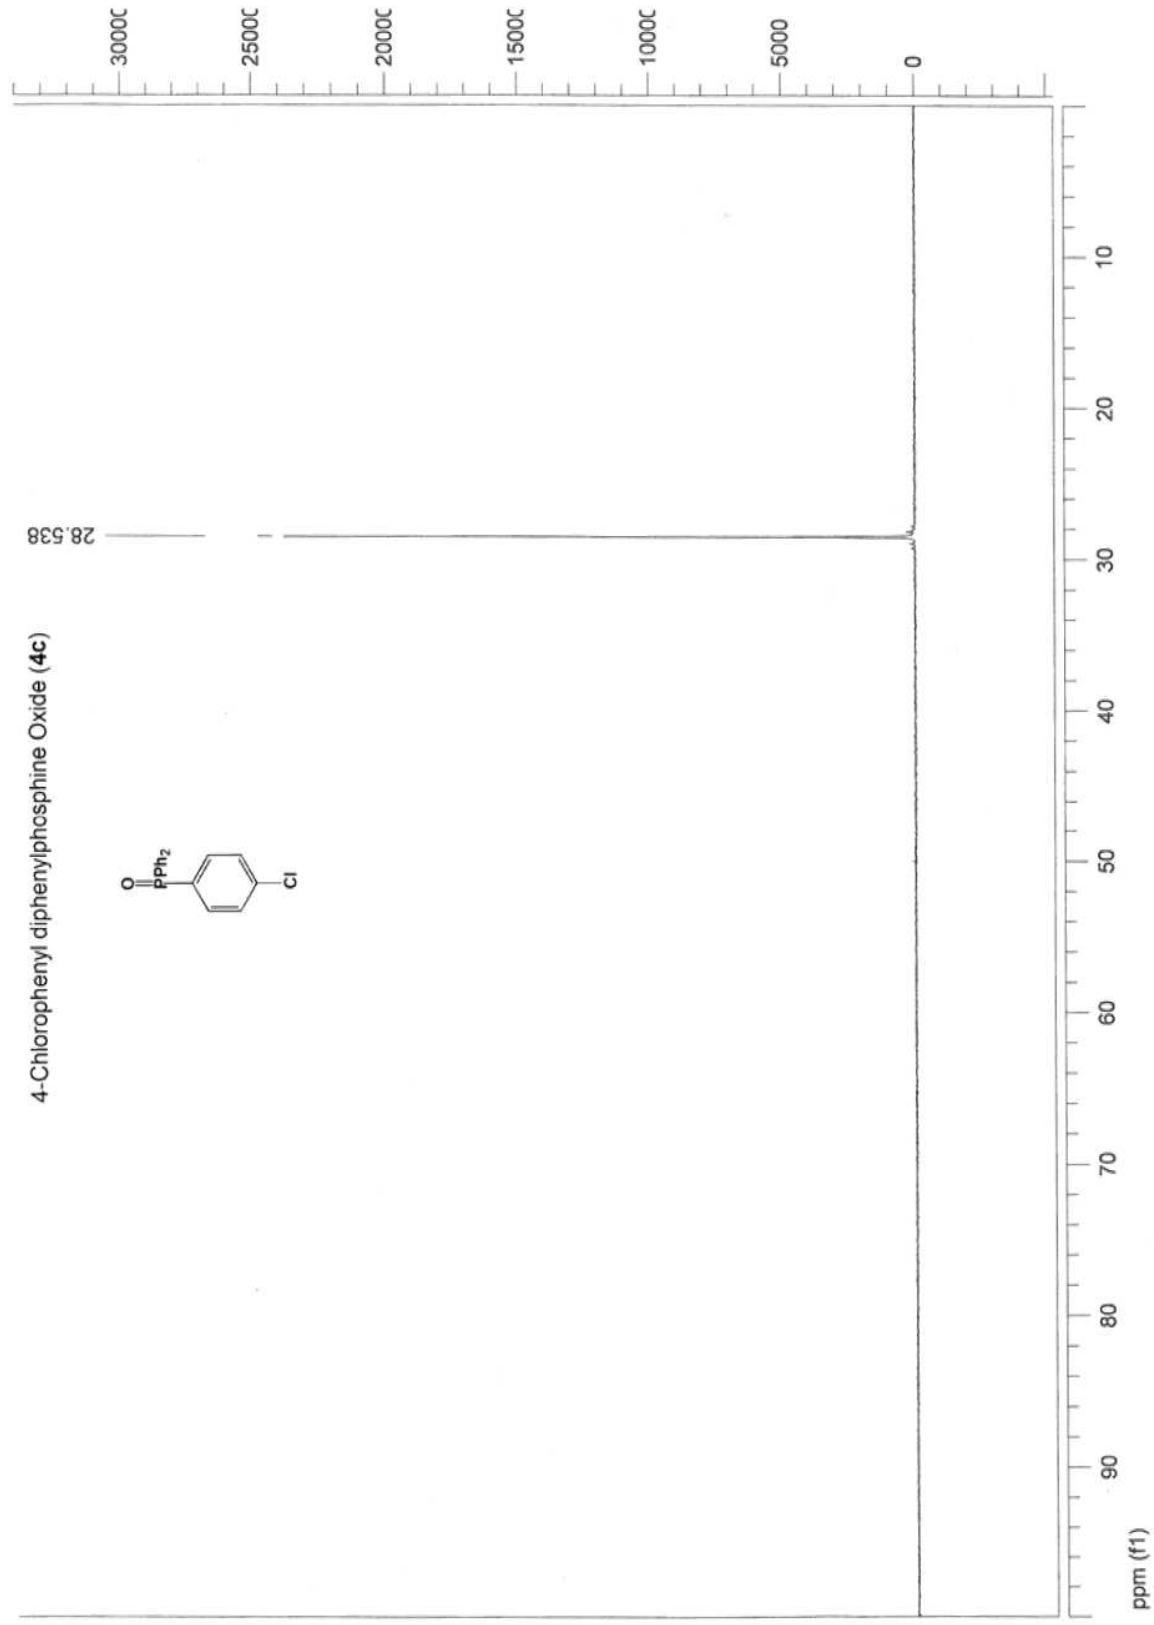

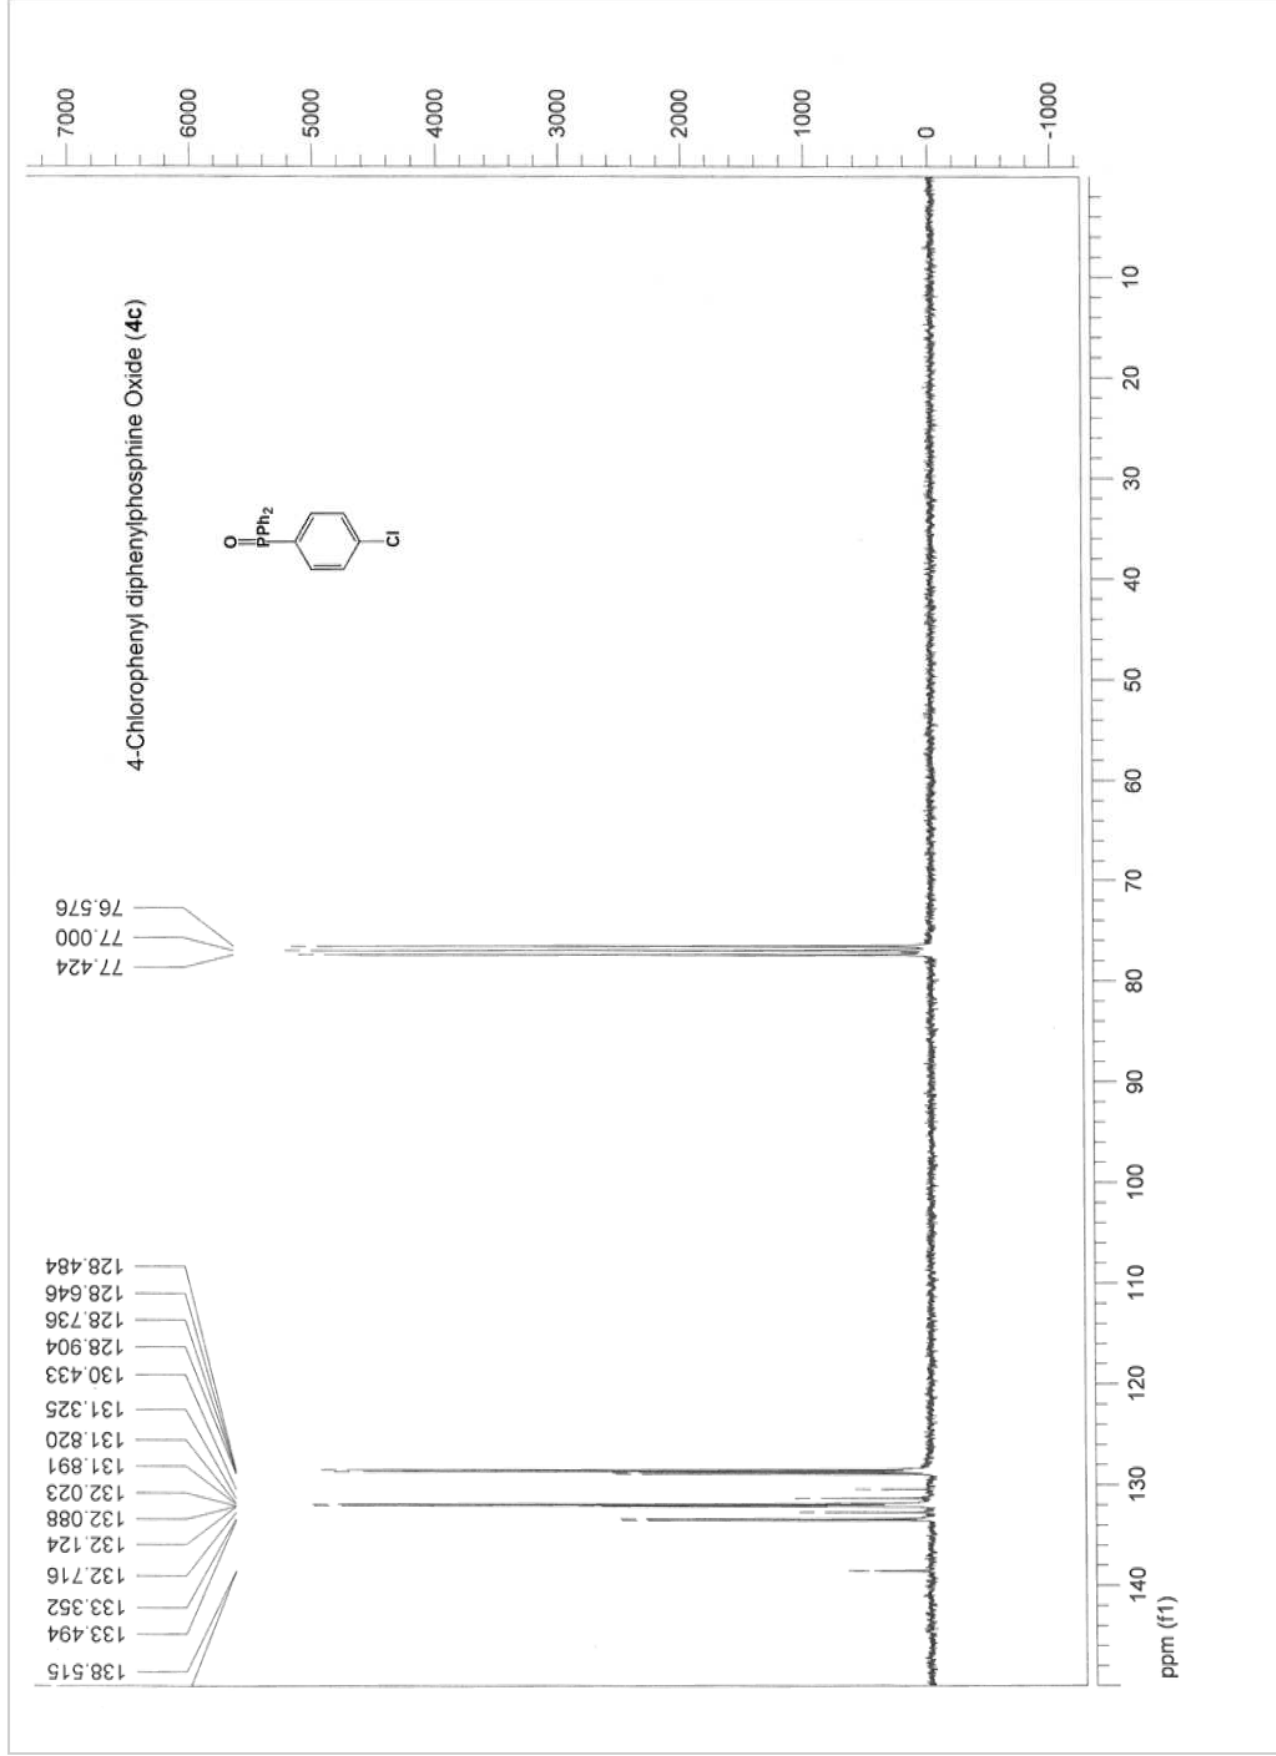

4-Chlorophenyl diphenylphosphine Oxide (4c)

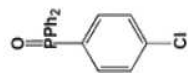

7.564  
7.541  
7.537  
7.520  
7.500  
7.496  
7.482  
7.453  
7.439  
7.434  
7.414  
7.410  
7.375  
7.365  
7.349  
7.339  
7.330  
7.317  
7.310  
7.302  
7.150

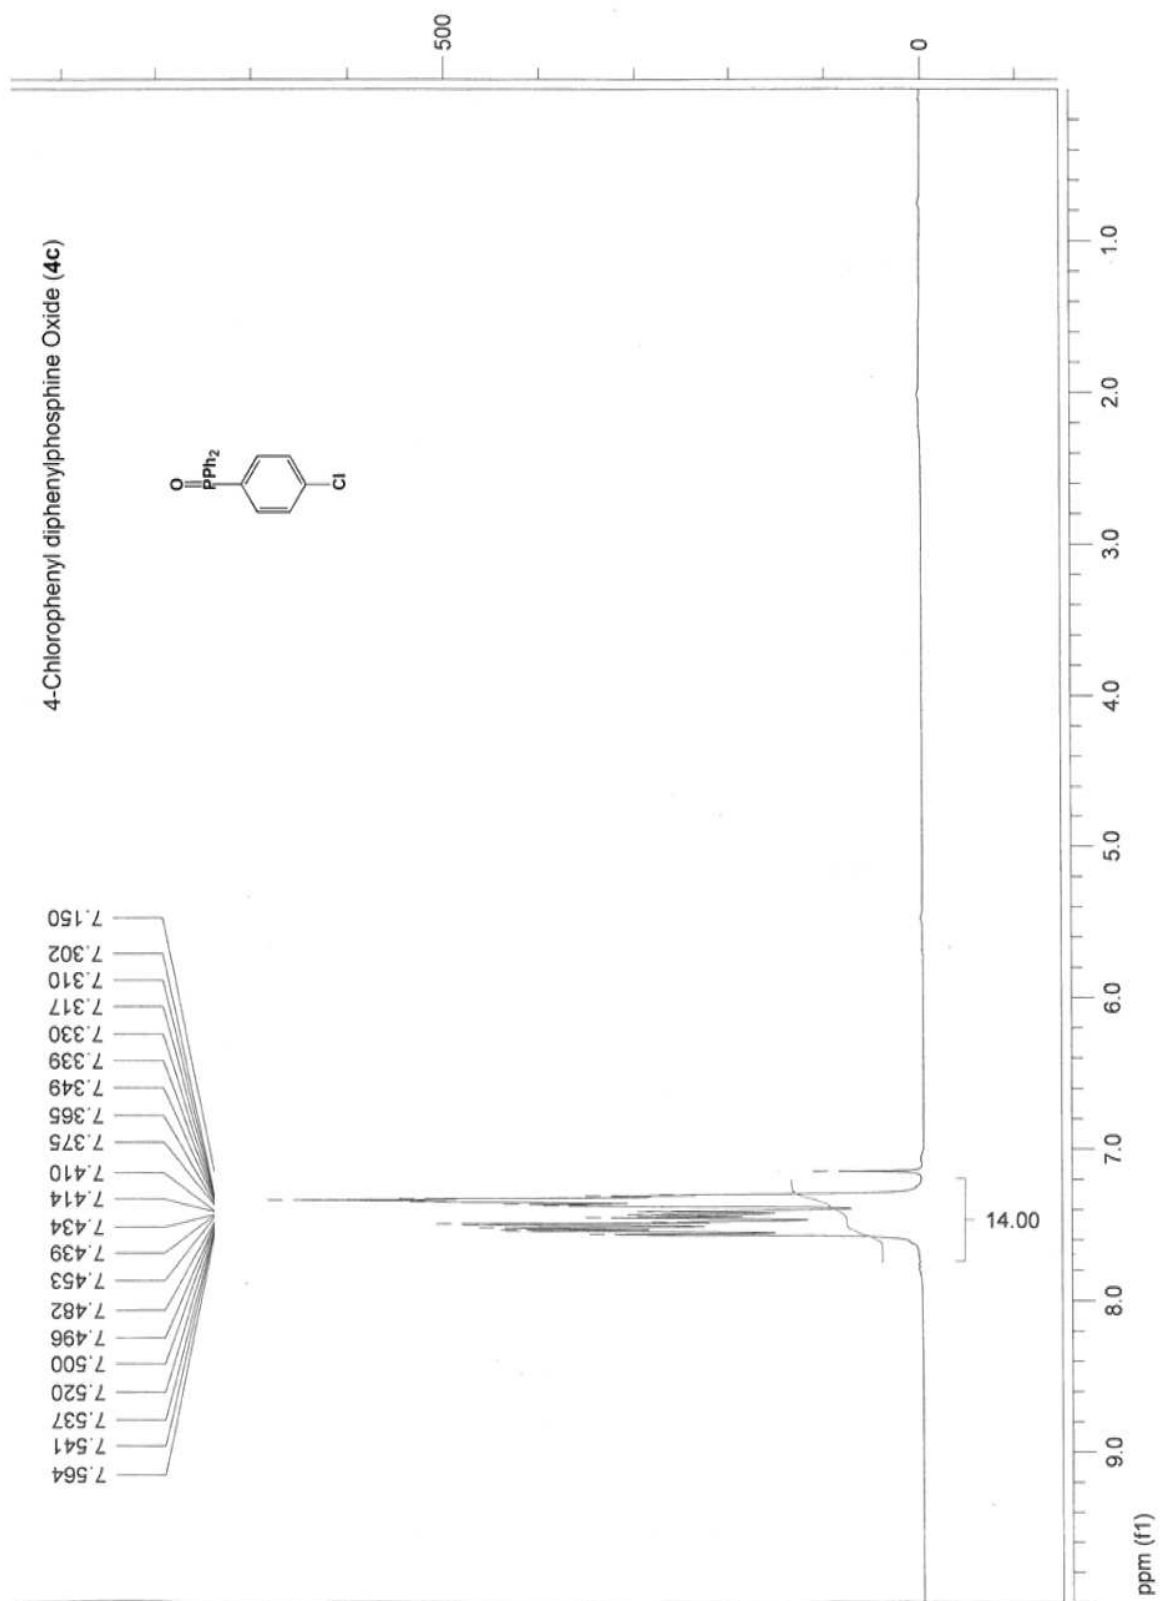

4-Fluorophenyl diphenylphosphine Oxide (**4d**)

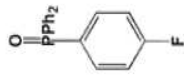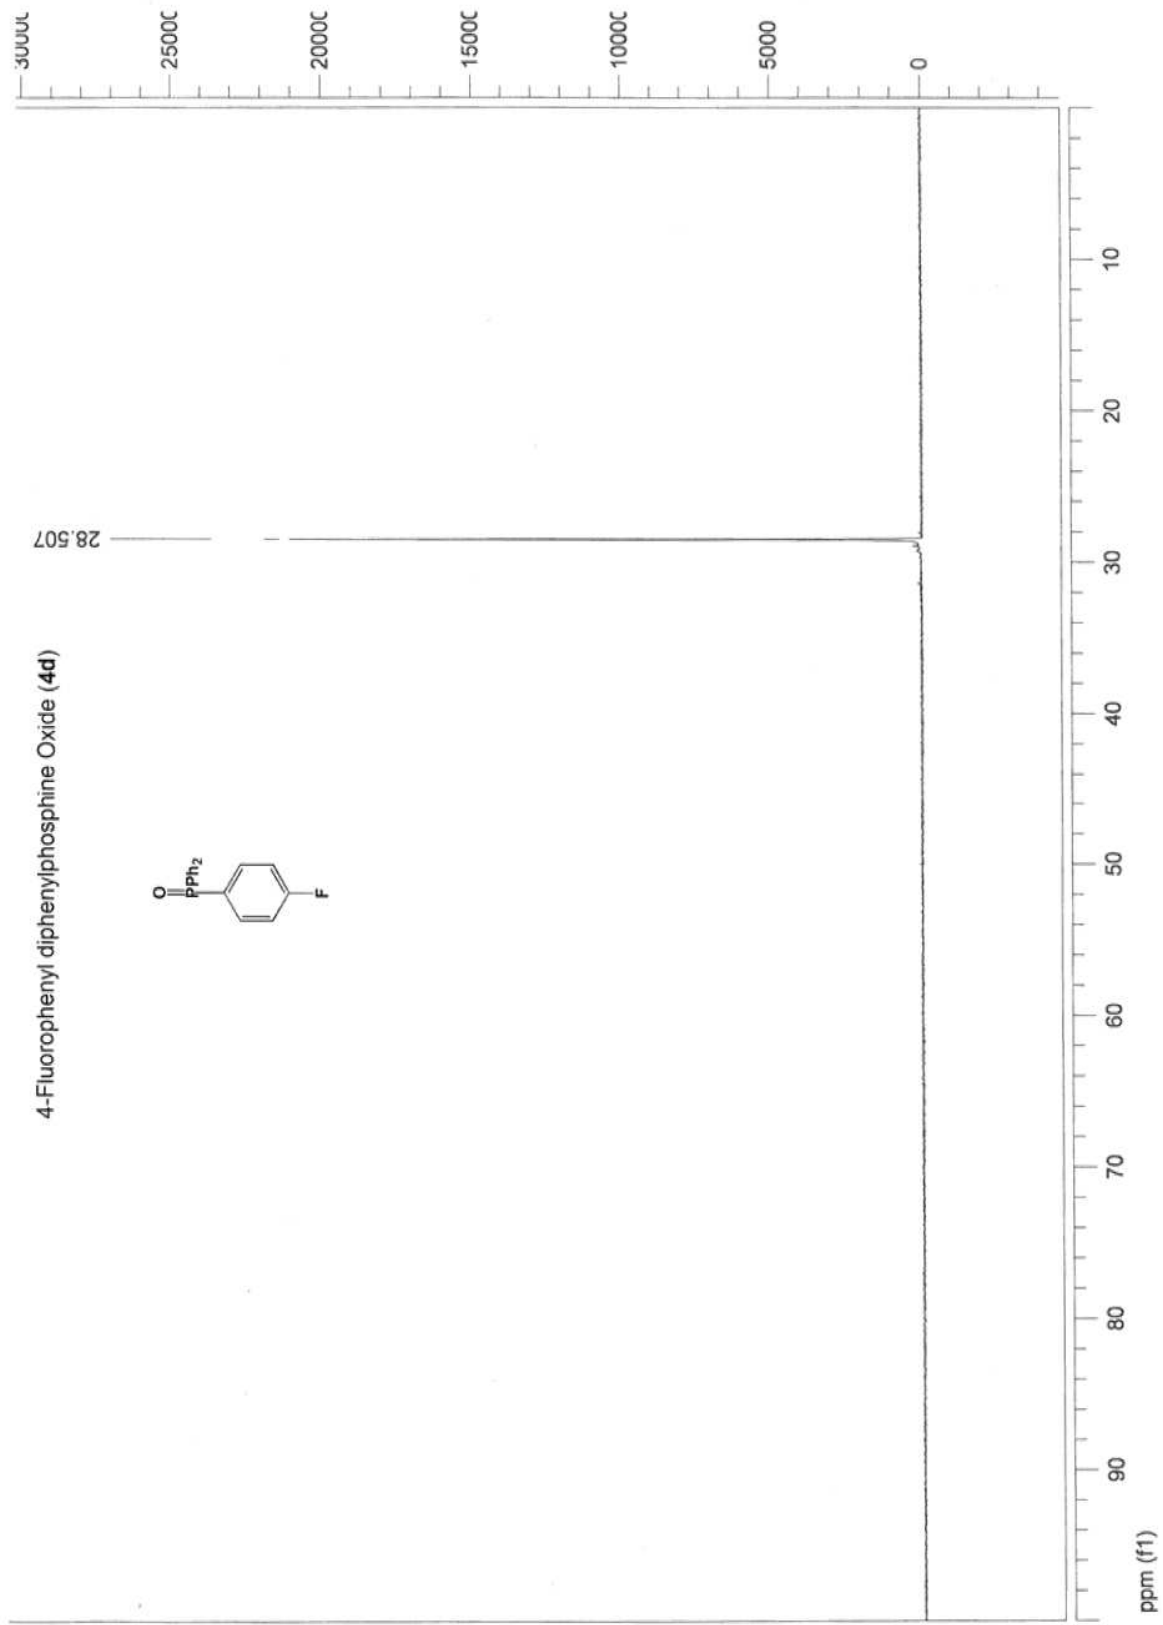



4-Fluorophenyl diphenylphosphine Oxide (**4d**)

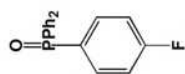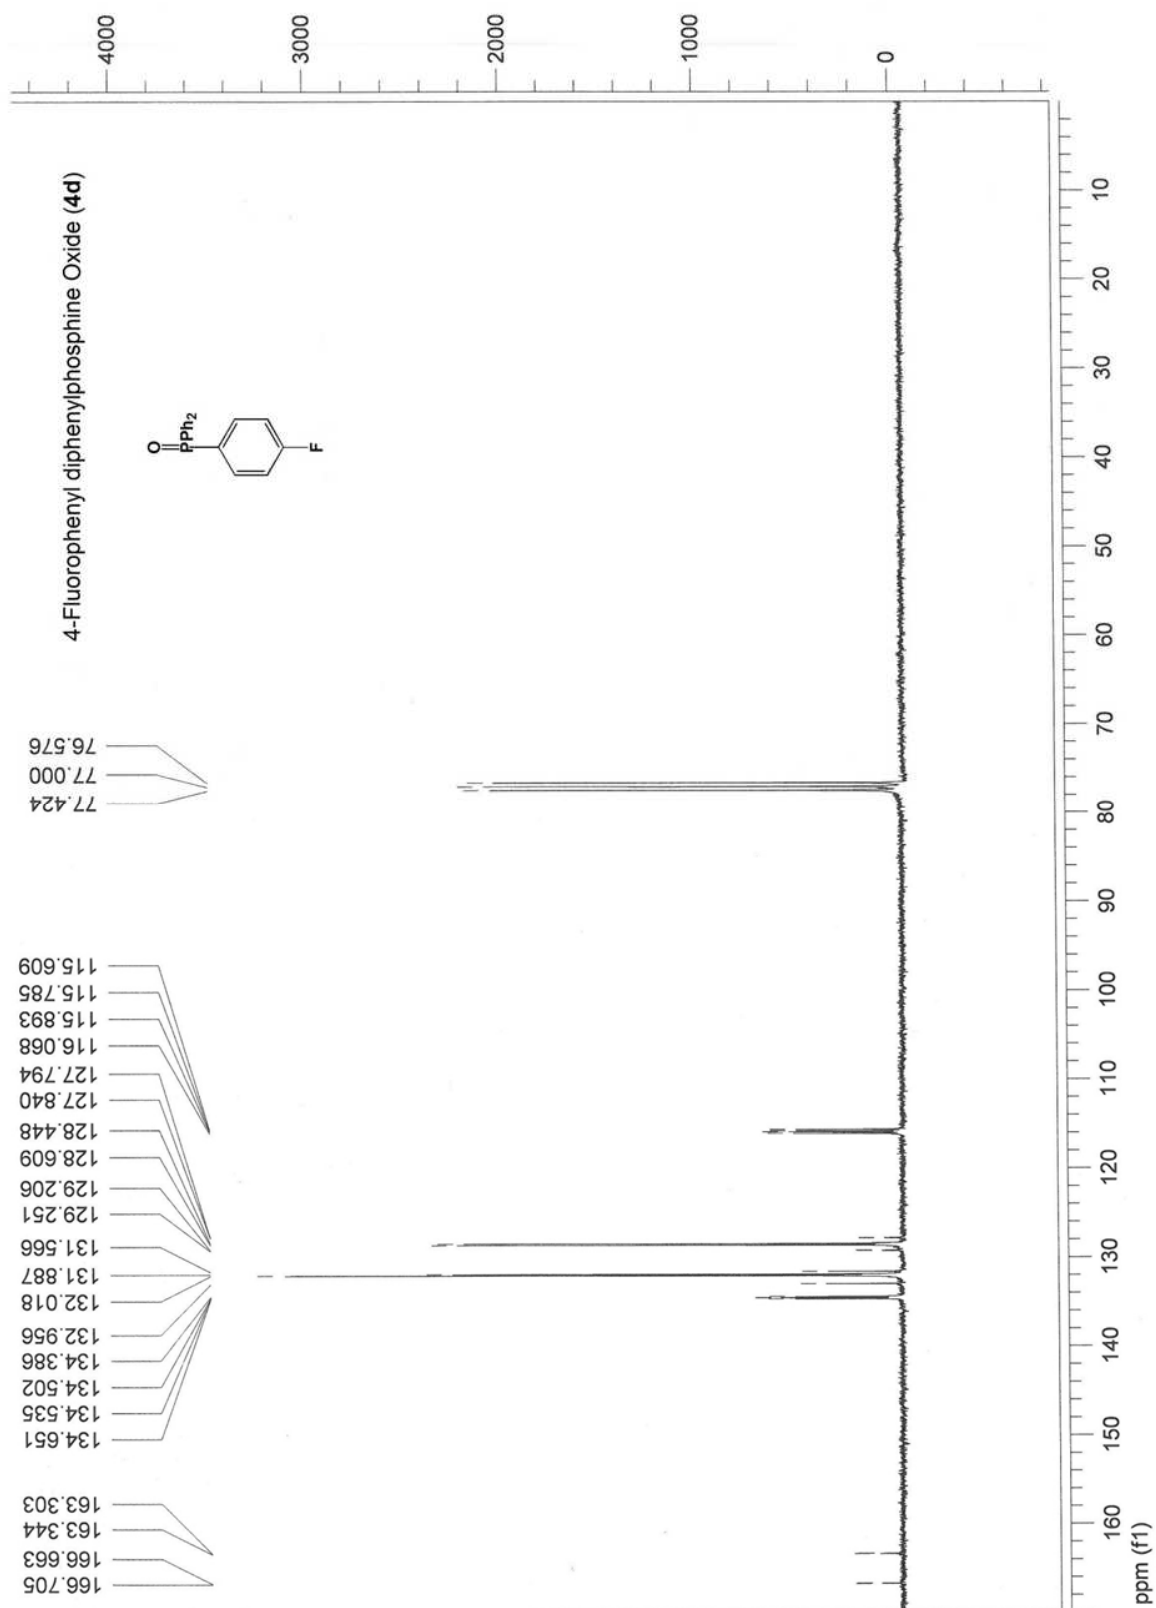

4-Fluorophenyl diphenylphosphine Oxide (4d)

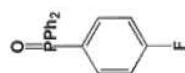

7.699  
7.675  
7.652  
7.635  
7.612  
7.566  
7.563  
7.541  
7.518  
7.480  
7.474  
7.455  
7.451  
7.433  
7.260  
7.164  
7.140  
7.137  
7.112

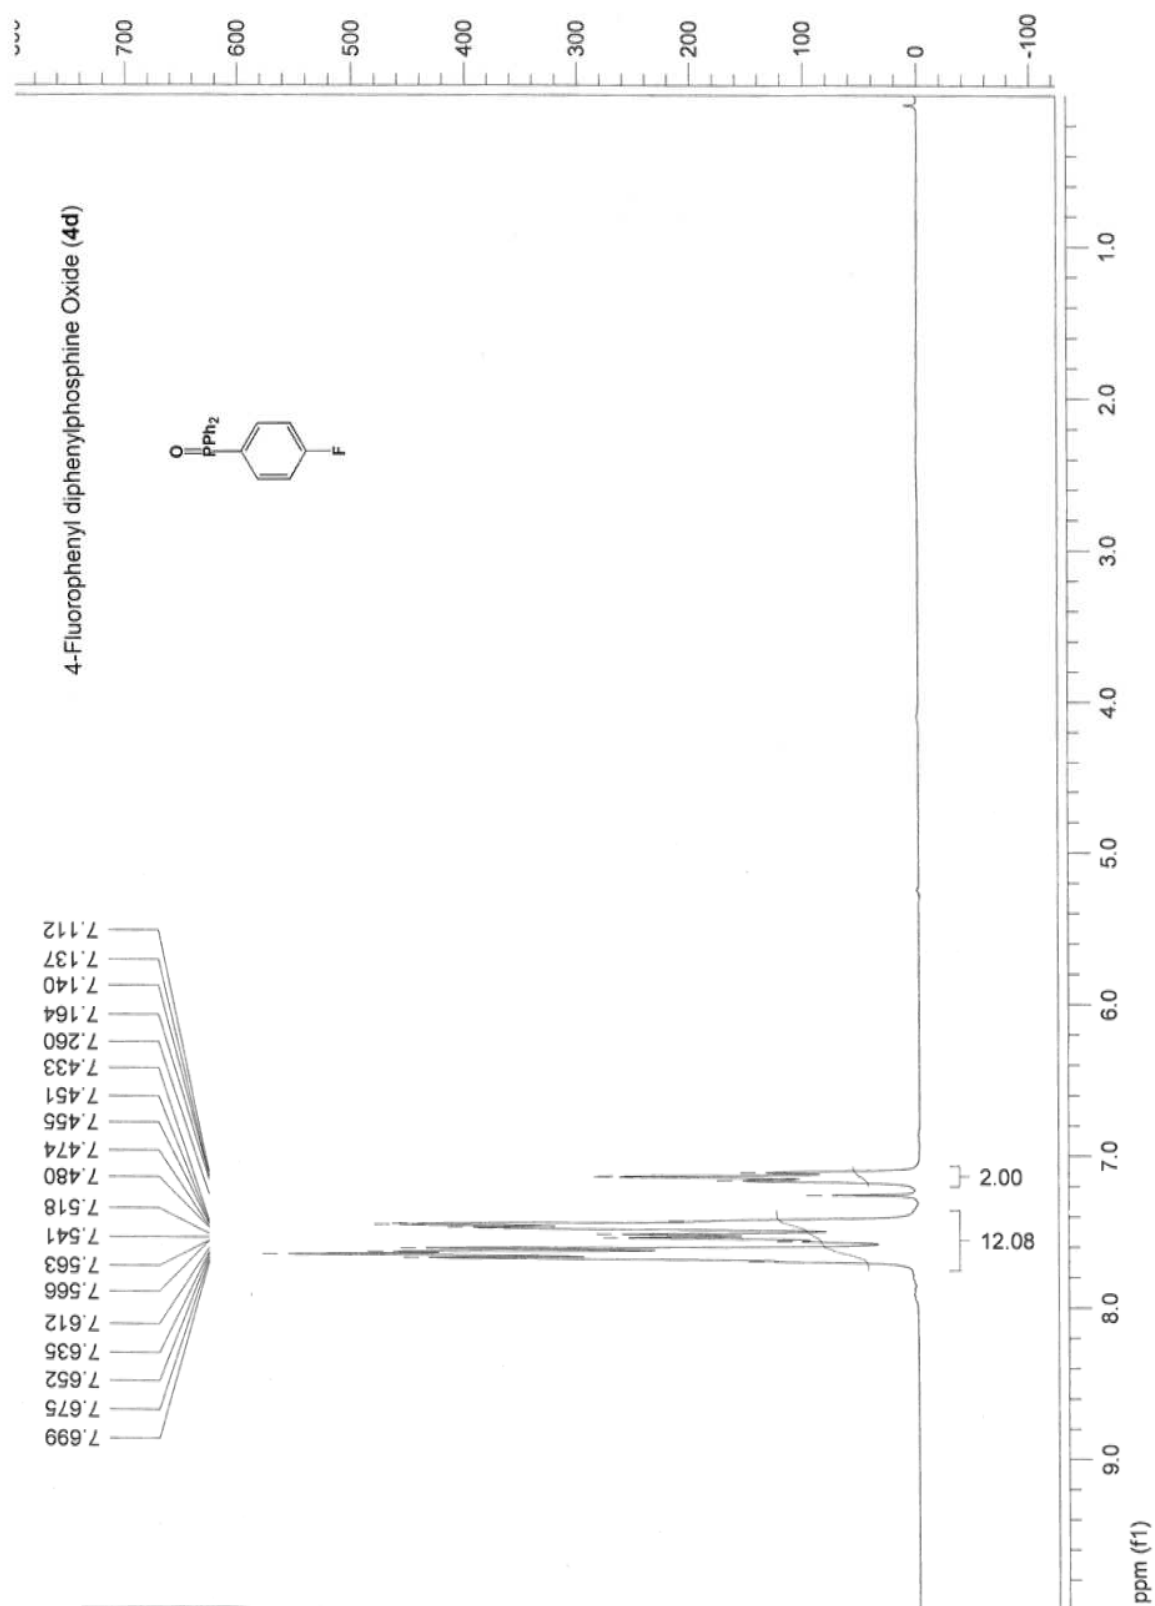

Dipropylphenylphosphine Oxide (6a)

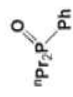

40.524

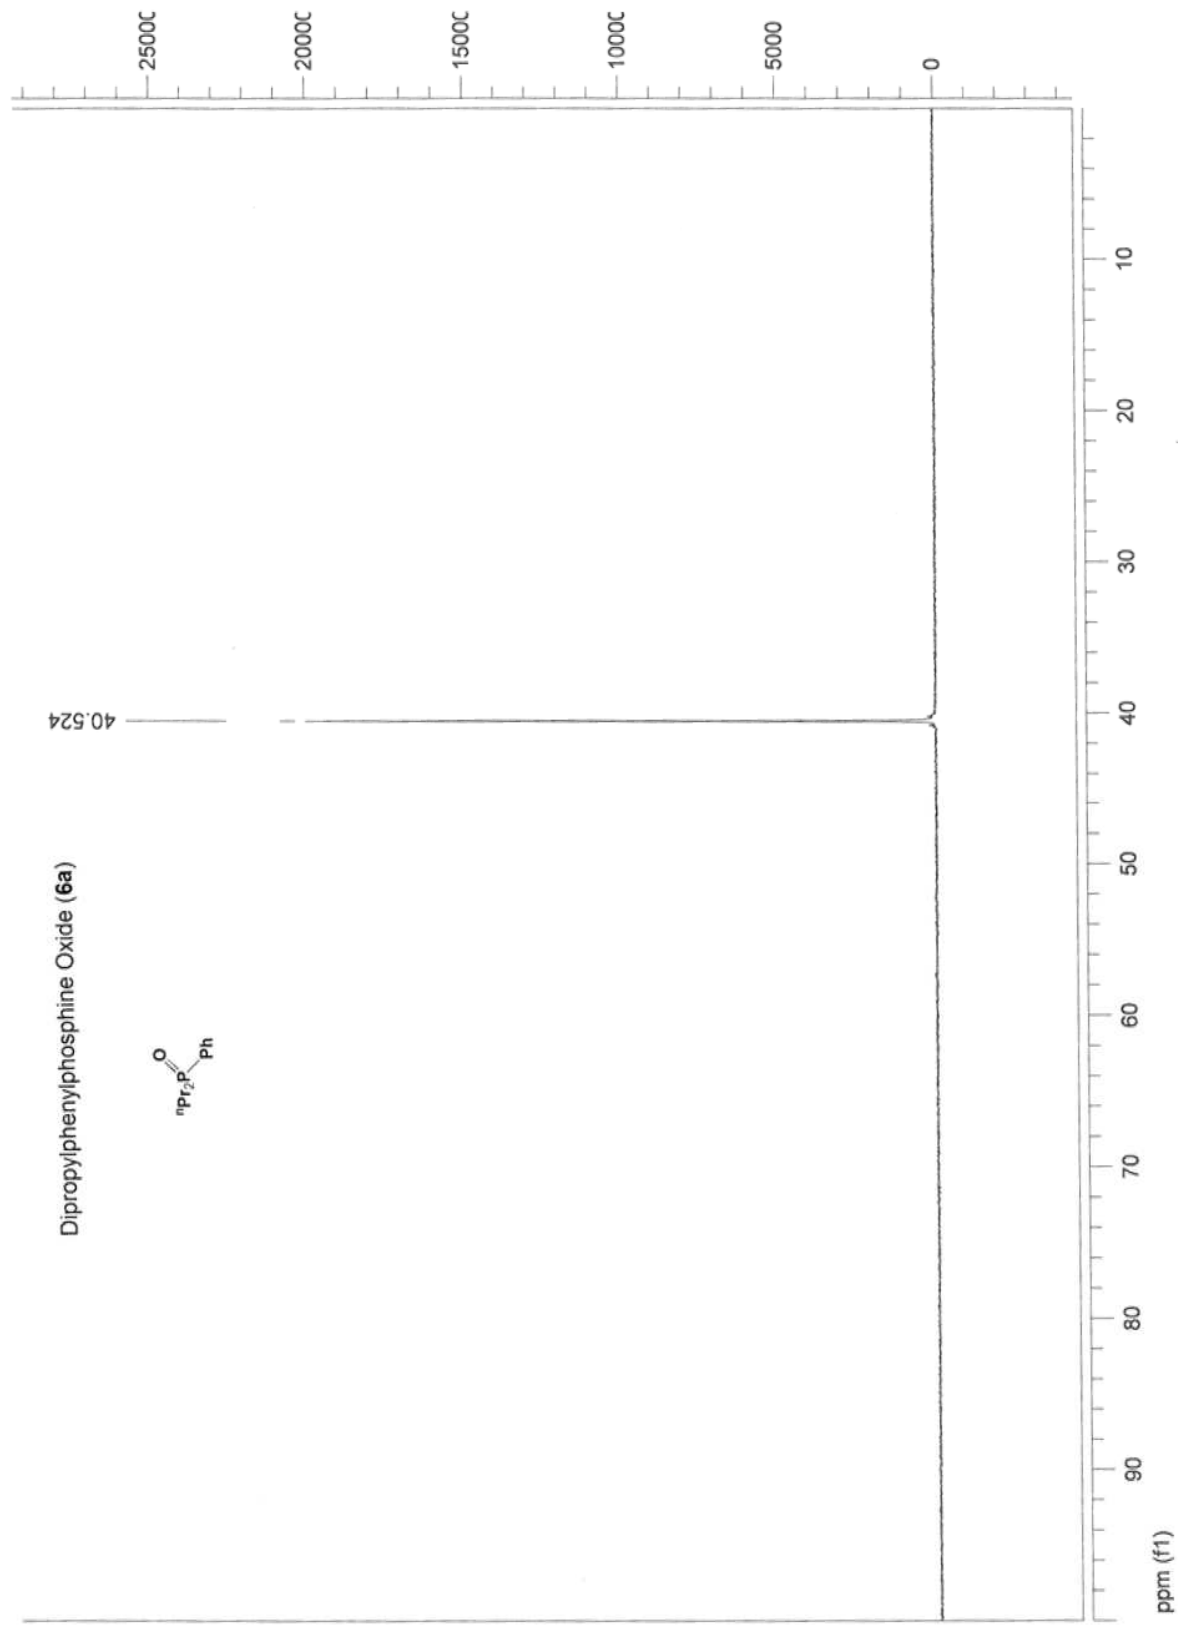

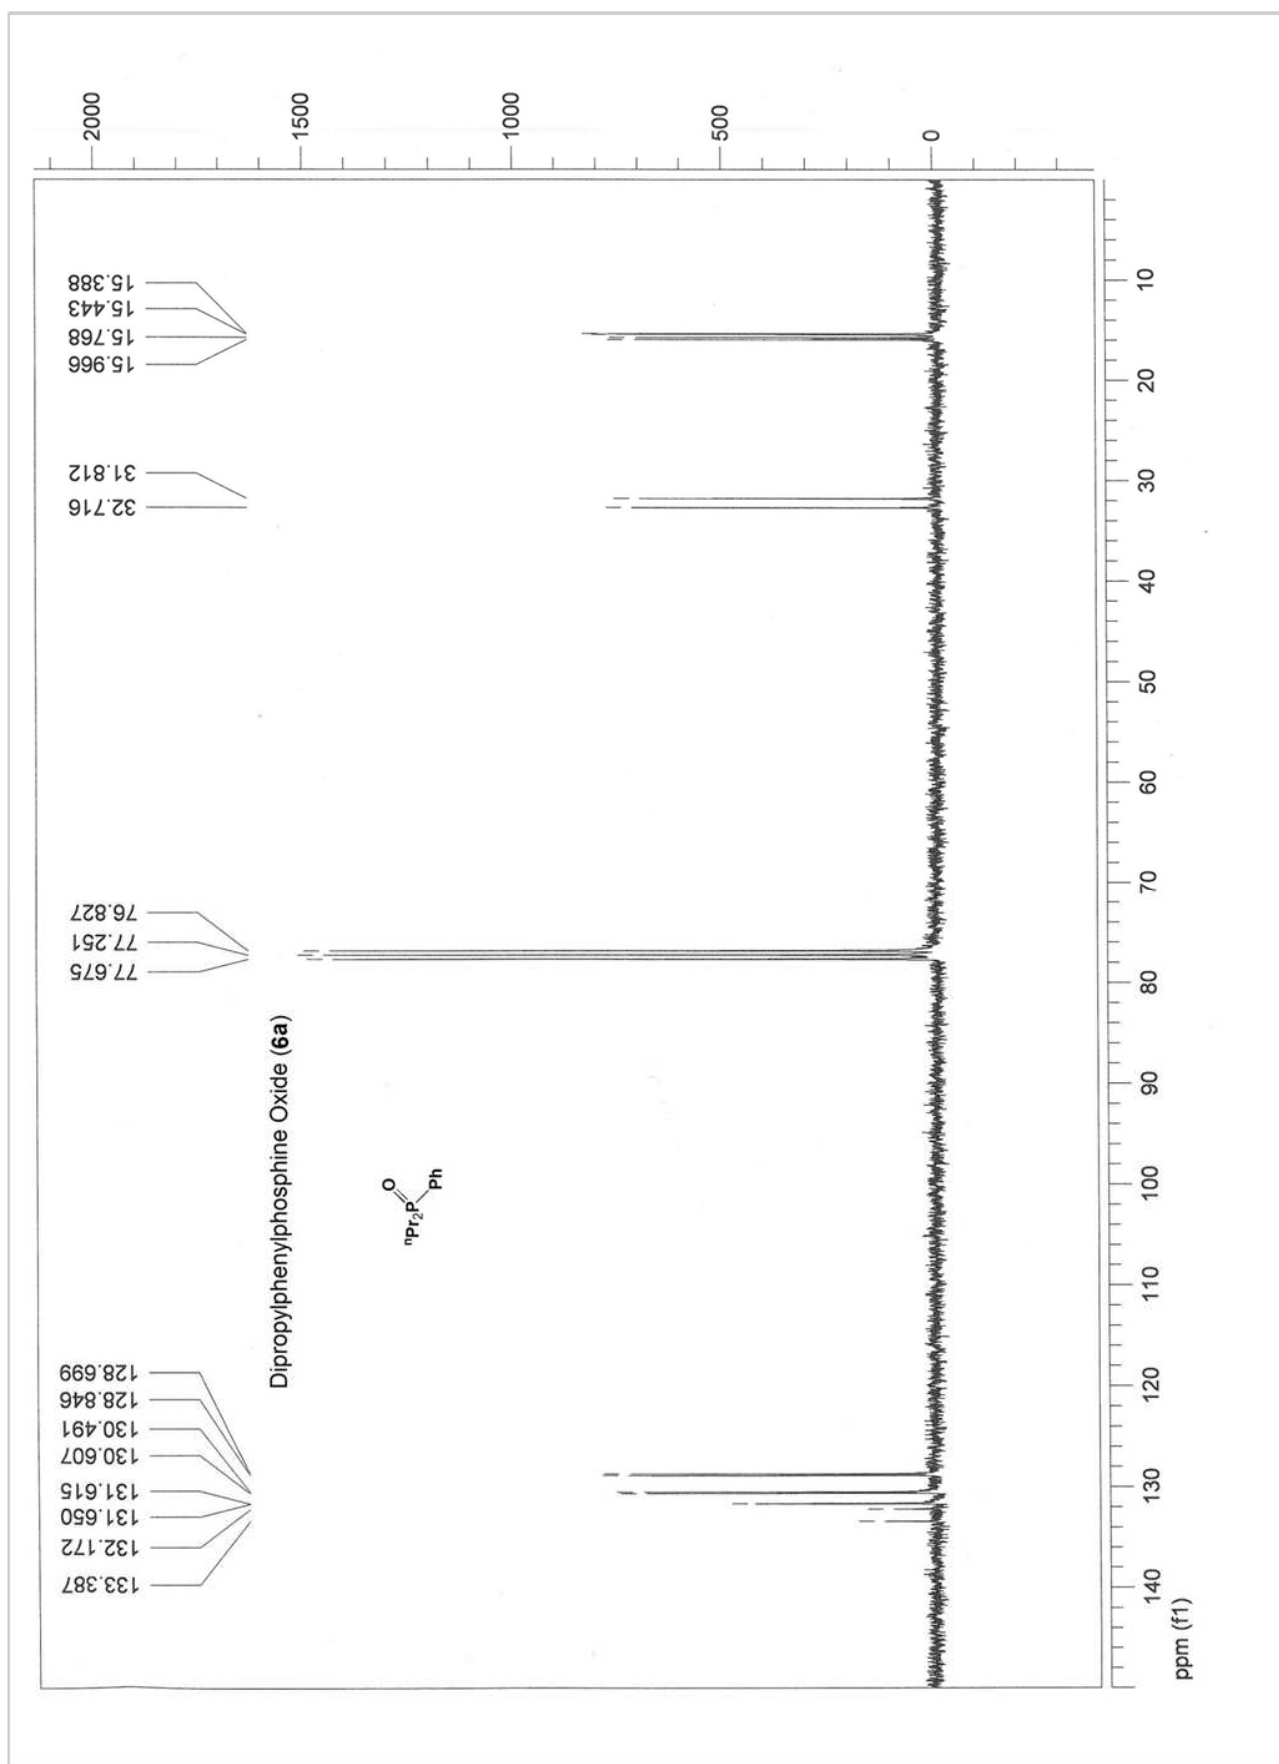

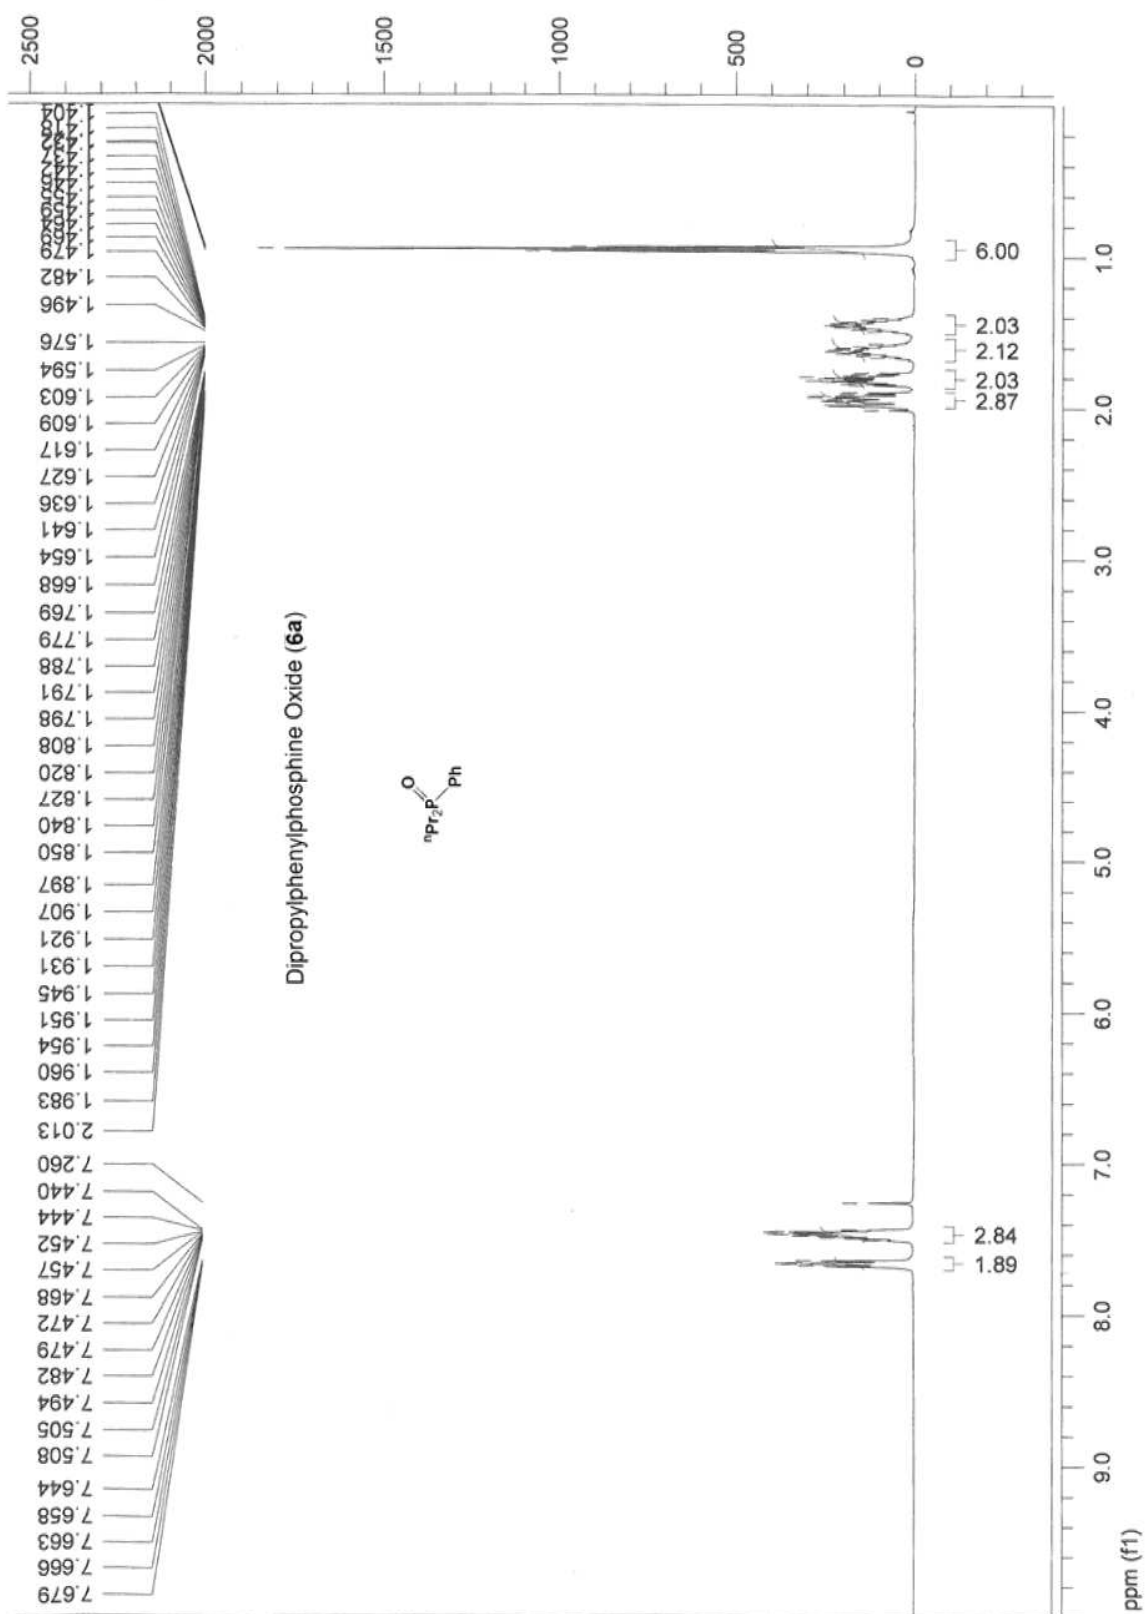

Dibutylphenylphosphine Oxide (**6b**)

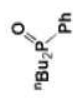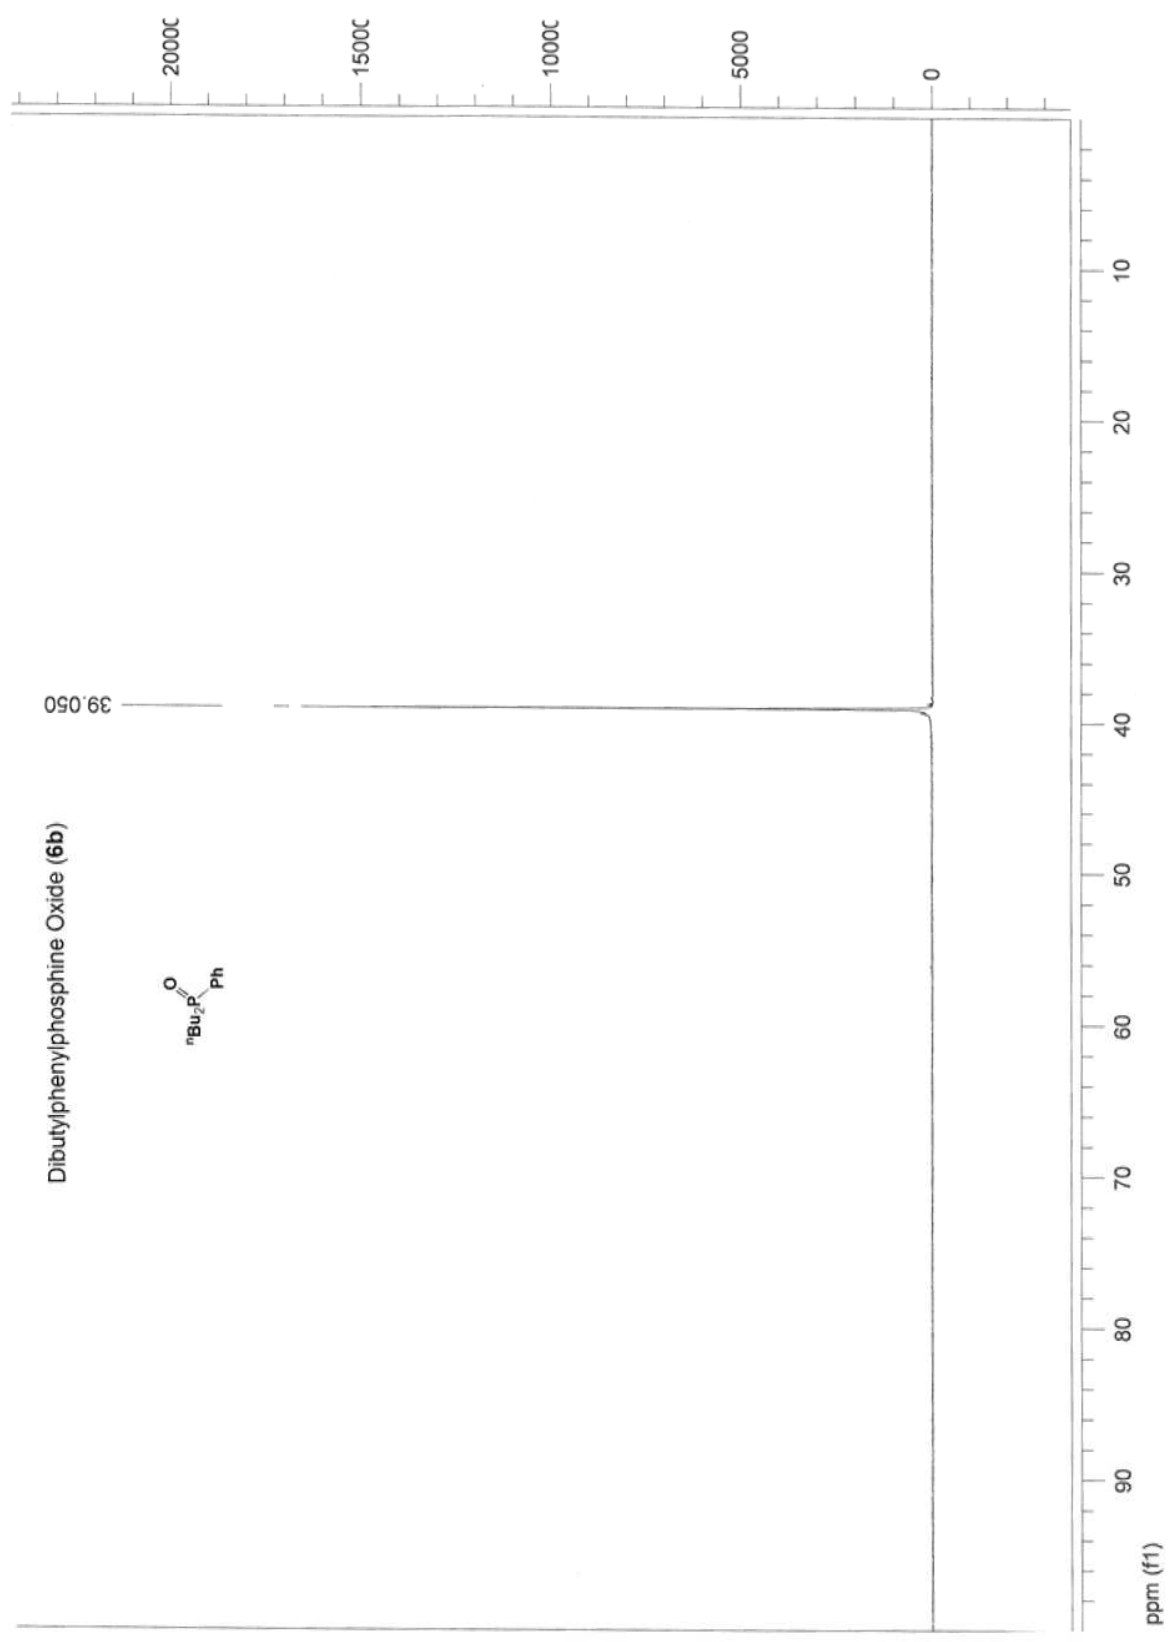

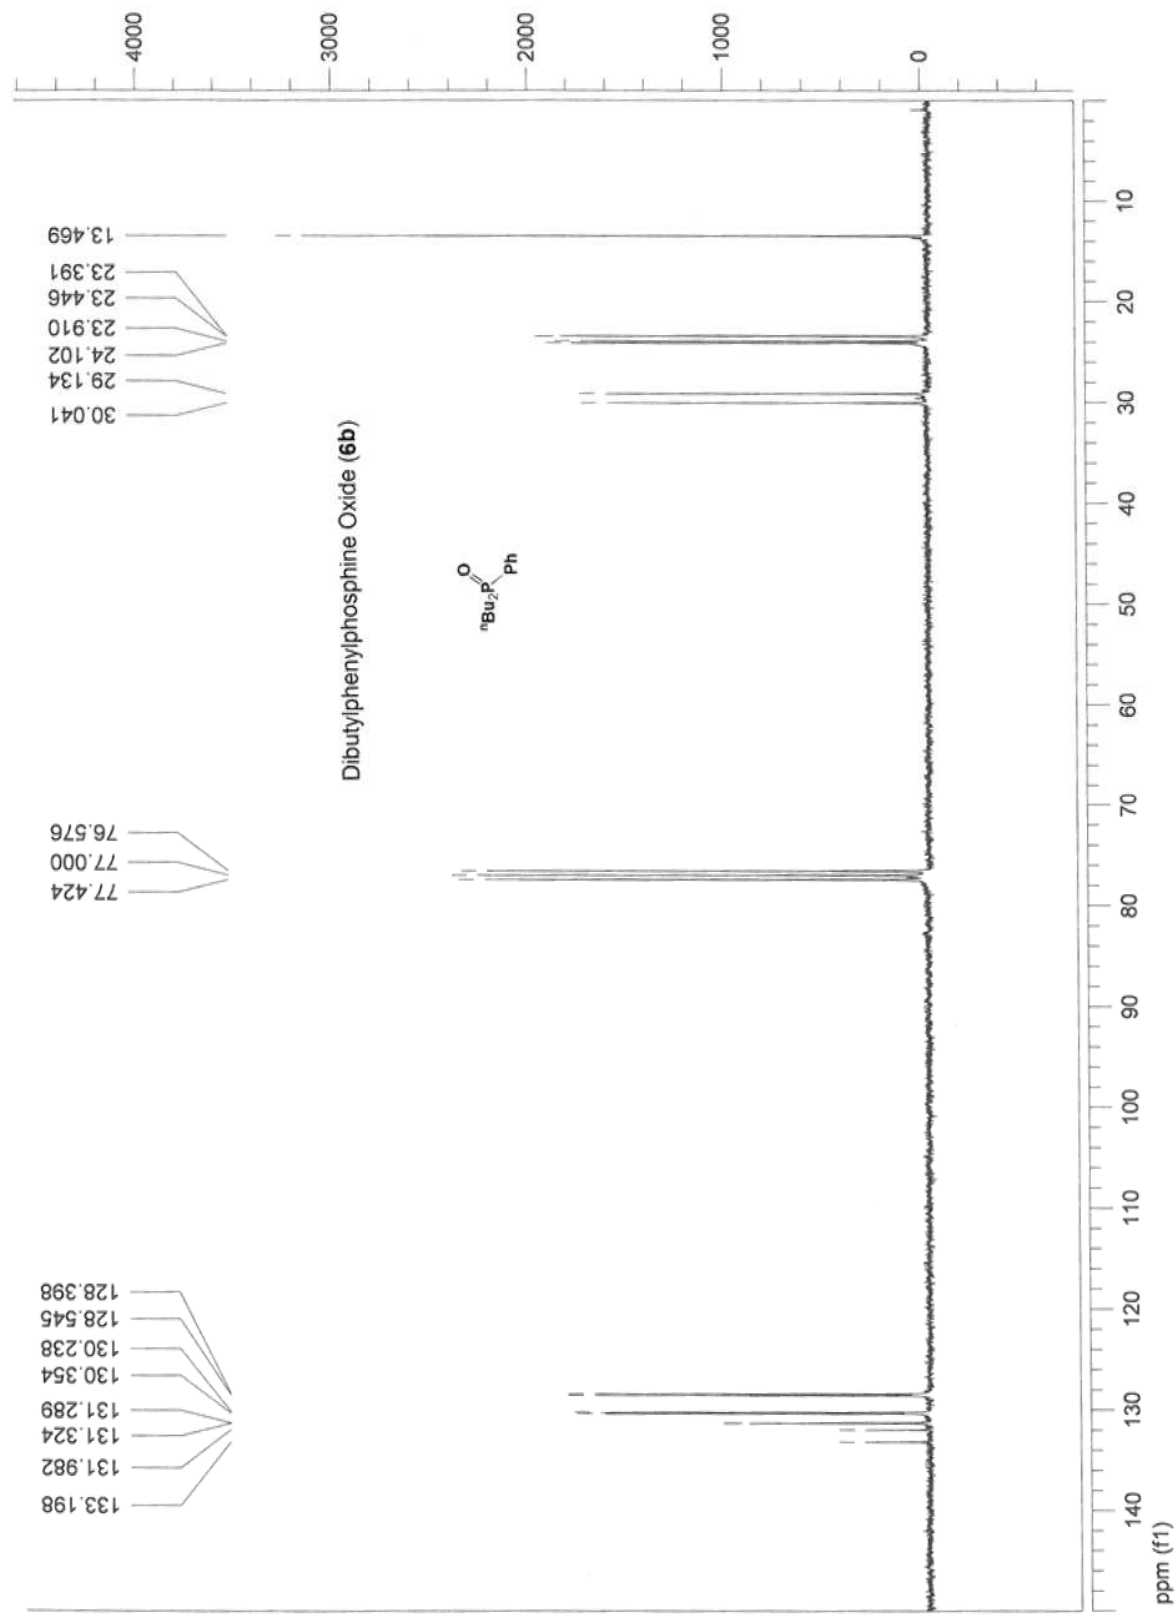

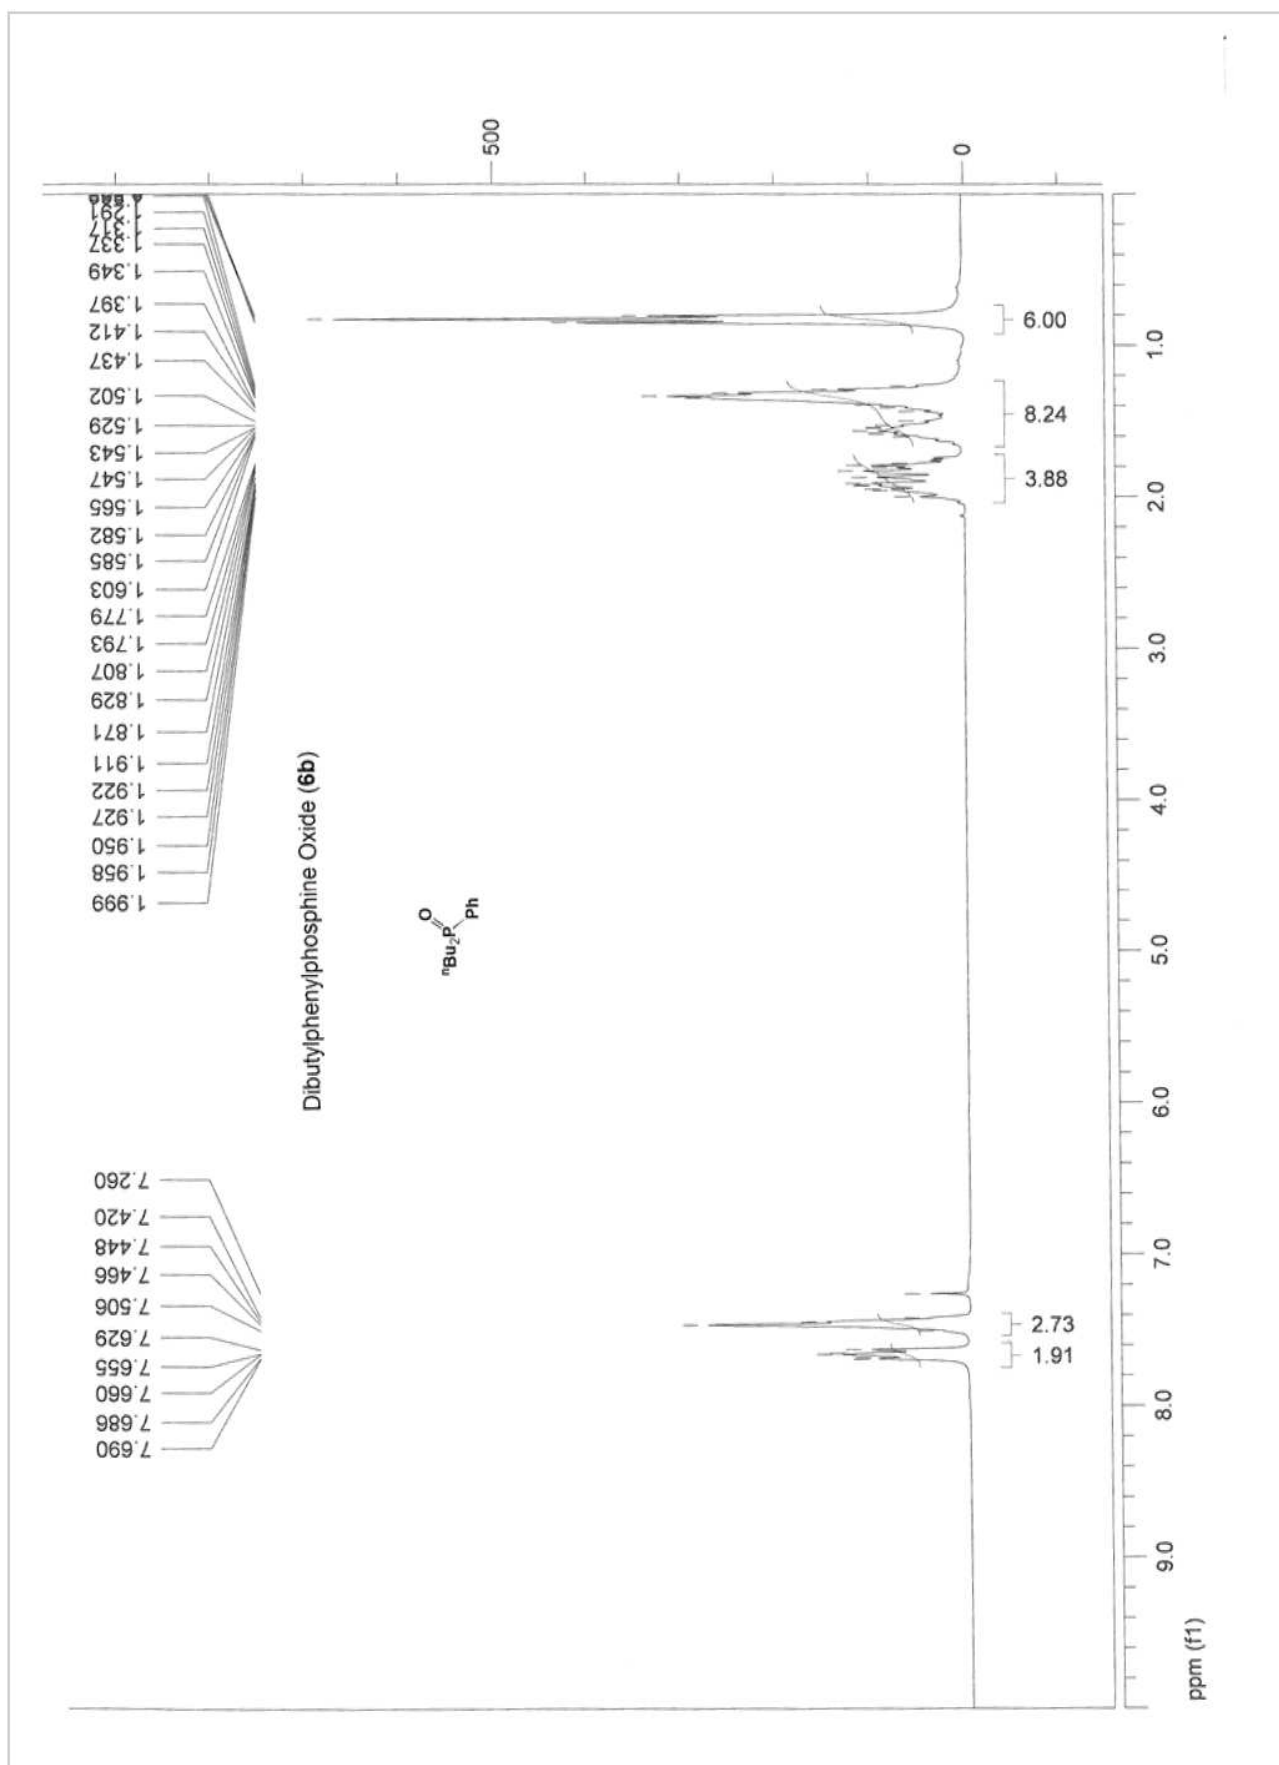



Dibenzylphenylphosphine Oxide (**6c**)

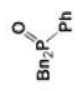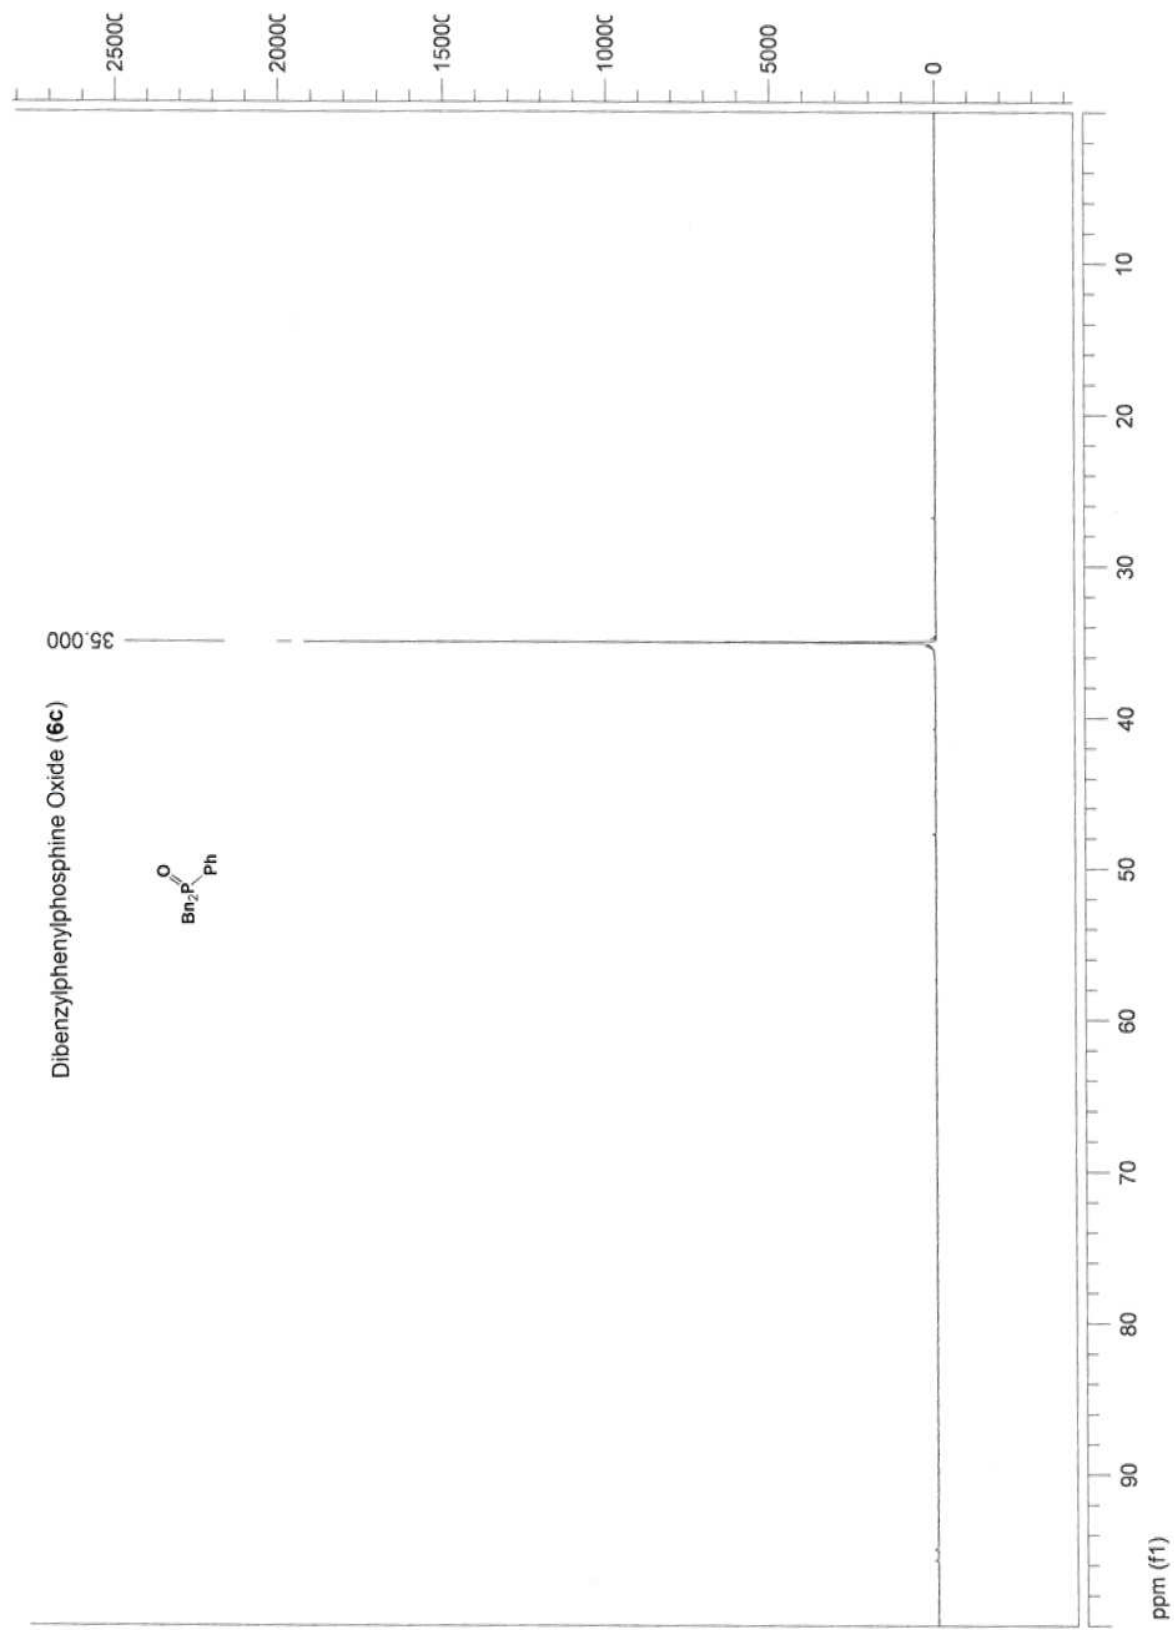

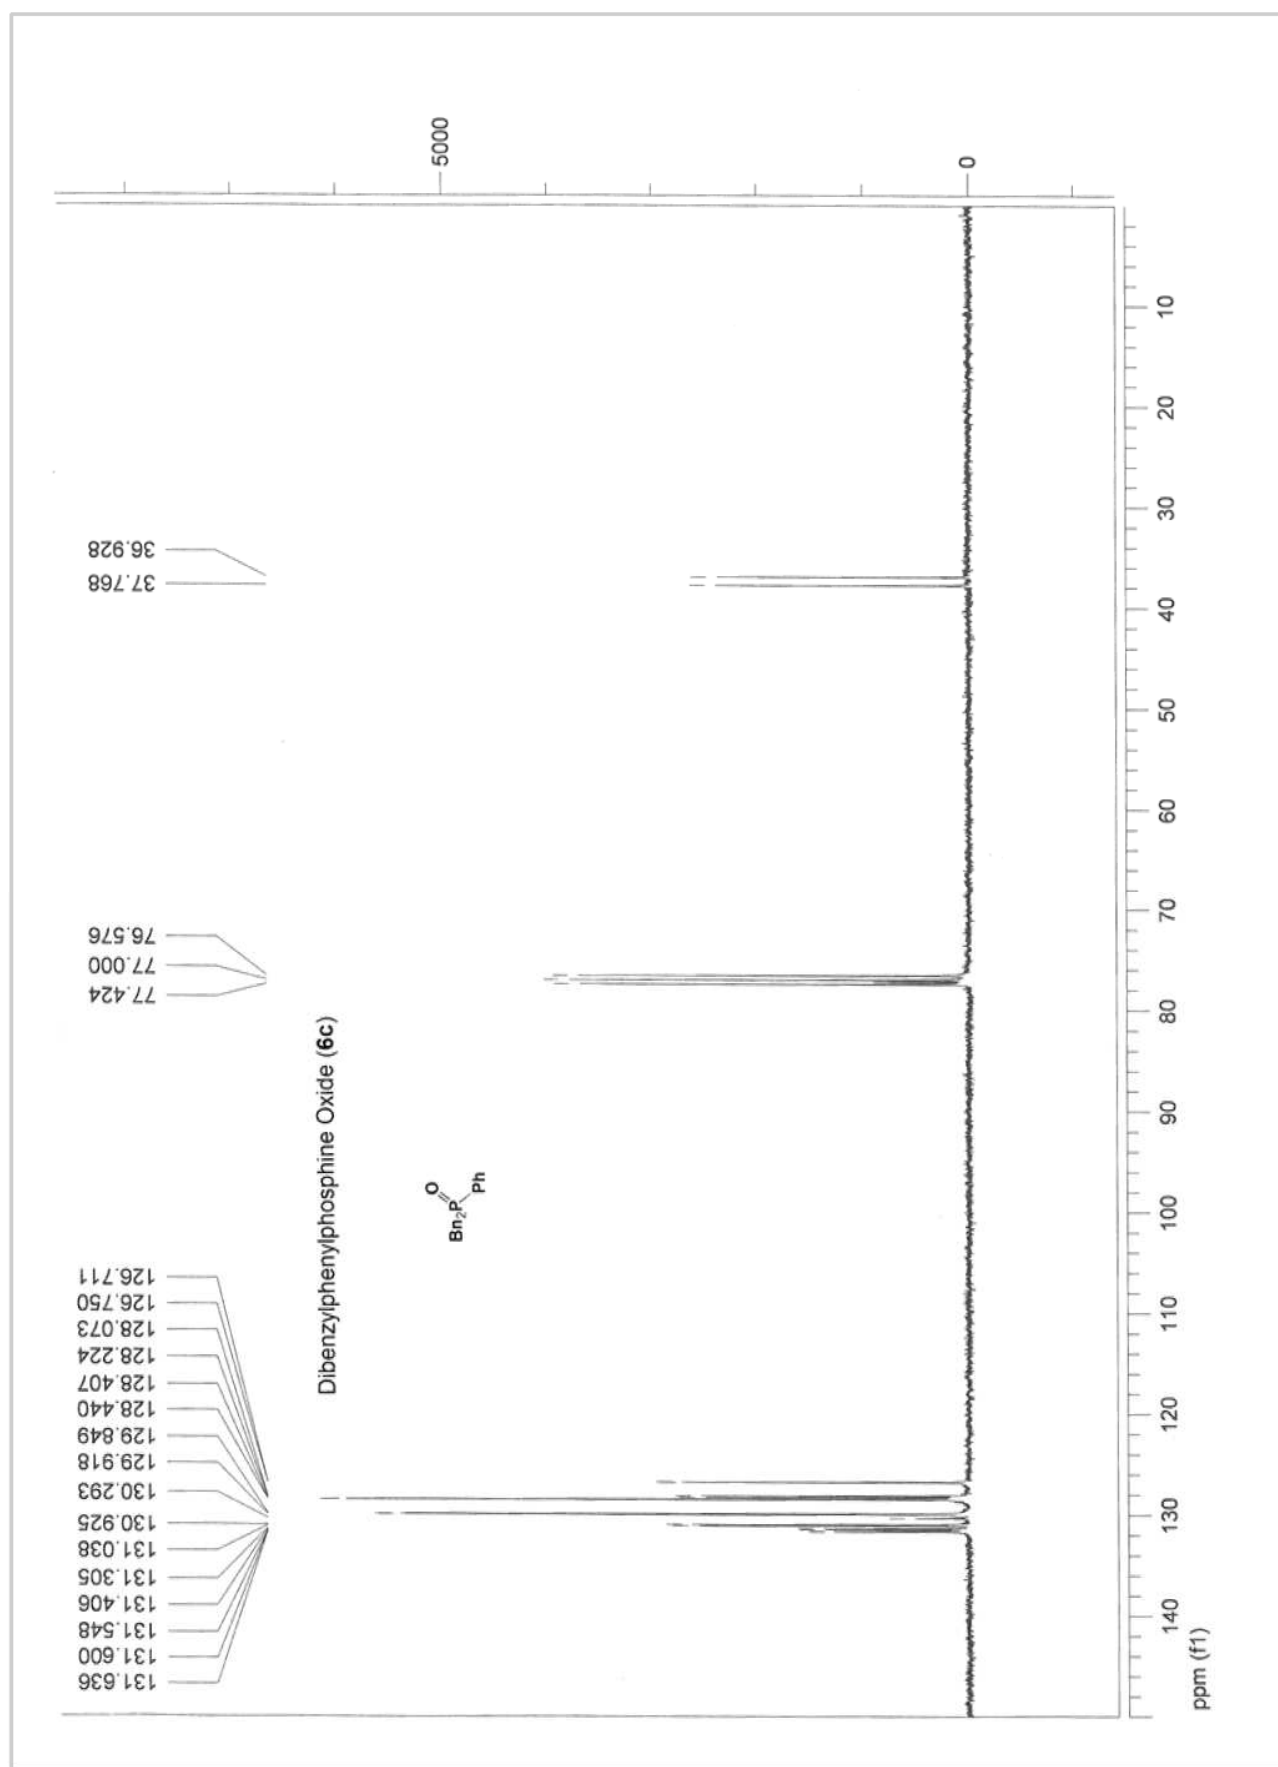

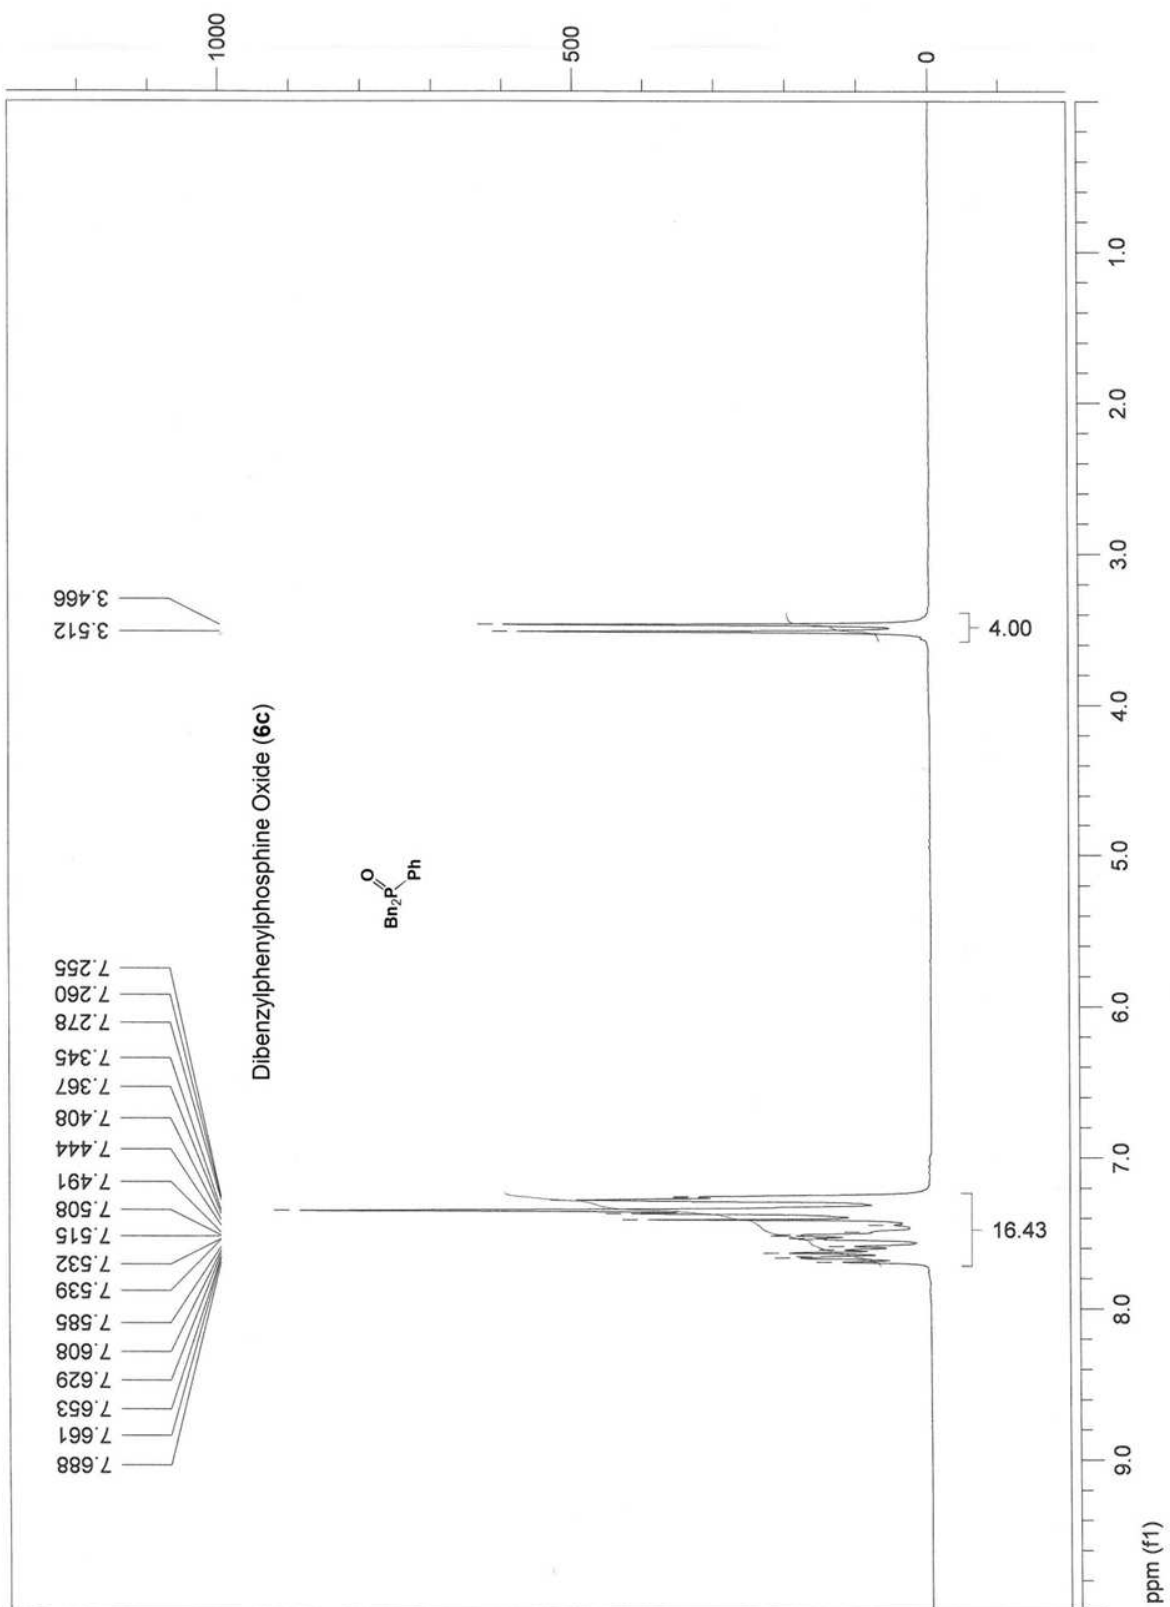

Supplement: c4ra03292f1.pdf [file c4ra03292f1.pdf]
